# Supplementary material for: Three-component coupling reaction for the synthesis of fully substituted triazoles: reactivity control of Cu-acetylide toward alkyl azides and diazo compounds
Source: Royal Society of Chemistry journal article supplement (doi:10.1039/d1qo01112j), 2021-01-01

## Supporting Information

### **Three-component Coupling Reaction for the Synthesis of Fully Substituted Triazoles: Reactivity Control of Cu-Acetylide toward Alkyl Azides and Diazo Compounds**

Fa-Jie Chen,<sup>a,b</sup> Phani Mamidipalli,<sup>b</sup> Venkata Reddy Sabbasani,<sup>b</sup> Huaqing Liu,<sup>b</sup> Yuanzhi Xia<sup>a\*</sup> and Daesung Lee<sup>b\*</sup>

<sup>a</sup> Department College of Chemistry and Materials Engineering, Wenzhou University, Wenzhou 325035, P. R. China

<sup>b</sup> Department of Chemistry, University of Illinois at Chicago, 845 West Taylor Street, Chicago, IL 60607, USA  
[phone: 001-(312)-996-5189; fax number: 001-(312)-996-0431; e-mail address: dsunglee@uic.edu]

| <b>Table of Contents</b> |                                                             | <b>Page</b> |
|--------------------------|-------------------------------------------------------------|-------------|
| I.                       | General Information                                         | S-2         |
| II.                      | General Procedure for the Preparation of Starting Materials | S-3         |
| III.                     | General Procedure for the Three-component Coupling          | S-4         |
| IV.                      | General Procedure for the Synthesis of Cyclic Triazoles     | S-4         |
| V.                       | Characterization Data                                       | S-5         |
| VI.                      | <sup>1</sup> H NMR and <sup>13</sup> C NMR Spectra          | S-20        |

## I. General Information

All reactions were carried out under an inert nitrogen or argon atmosphere, unless otherwise indicated. Compounds were purchased from Aldrich unless otherwise noted. CH<sub>3</sub>CN were purified based on standard procedures. Flash column chromatography was performed using silica gel 60 Å (32-63 mesh) purchased from SiliCycle. Analytical thin layer chromatography (TLC) was performed on 0.25 mm SiliCycle precoated silica gel 60 (particle size 0.040–0.063 mm). Iodide, KMnO<sub>4</sub>, UV light (254 nm) and vanillin were used as the TLC stains. <sup>1</sup>H NMR and <sup>13</sup>C NMR spectra were recorded on a Bruker AV-500 spectrometer. <sup>1</sup>H and <sup>13</sup>C chemical shifts were referenced to internal solvent resonances and reported relative to SiMe<sub>4</sub>; multiplicities are indicated by s (singlet), d (doublet), t (triplet), q (quartet), m (multiplet) and br (broad). Coupling constants, *J*, are reported in Hz (Hertz). Electrospray ionization (ESI) mass spectra were recorded on a Micromass LCT equipped with a time-of-flight analyzer on a Waters Micromass Q-ToF Ultima in the University of Illinois at Urbana-Champaign. Electron impact (EI) mass spectra were obtained using a Micromass AutoSpec™.

## II. General Procedure for the Preparation of Starting Materials

*N*-Propargylamides **S2** was prepared following the reported procedure by Albert Padwa and co-worker.<sup>1</sup> Diazoamides **S3** and **S4** were prepared following a modified procedure of Armido Studer and co-workers.<sup>2</sup>

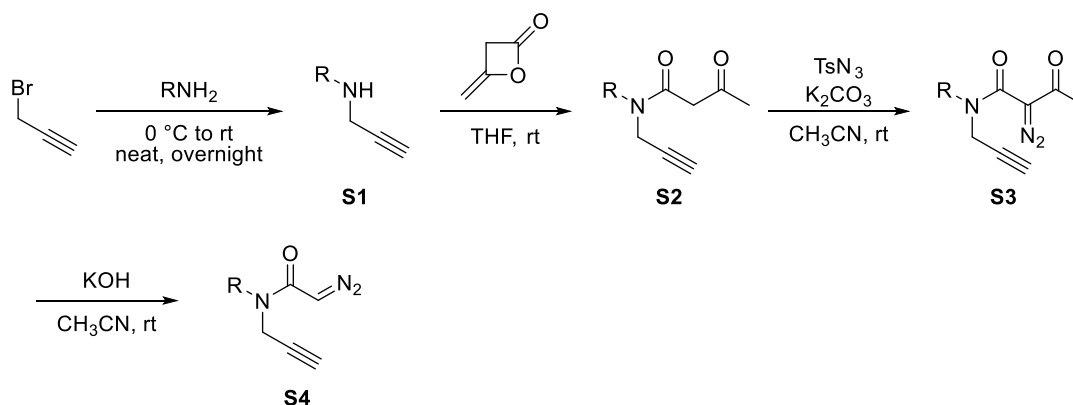

**Preparation of S1:** Propargyl bromide (1.0 equiv., 80 wt. % in toluene) was added dropwise to amine (6.0 equiv.) at 0 °C. The mixture was warmed to room temperature and stirred overnight. NaOH (1 M, 4 mL/mmol) and Et<sub>2</sub>O (4 mL/mmol) was added and stirred for 5 minutes. The mixture was extracted with Et<sub>2</sub>O and the combined organic layer was dried over

<sup>1</sup> Verniest, G.; Padwa, A. Gold- and Silver-Mediated Cycloisomerizations of *N*-Propargylamides. *Org. Lett.* **2008**, *10*, 4379.

<sup>2</sup> Döben, N.; Yan, H.; Kischkewitz, M.; Mao, J.; Studer, A. Intermolecular Acetoxyaminoalkylation of  $\alpha$ -Diazo Amides with (Diacetoxyiodo)benzene and Amines. *Org. Lett.* **2018**, *20*, 7933.

anhydrous Na<sub>2</sub>SO<sub>4</sub>, filtered and concentrated under reduced pressure. The residue was purified by flash column chromatography to afford *N*-propargylamine **S1**.

**Preparation of S2:** To a solution of diketene (5 mmol, 50% in CH<sub>2</sub>Cl<sub>2</sub>) in dry THF (10 mL) was added a solution of *N*-propargylamine **S1** (5 mmol) in 2 mL of dry THF at rt over 3 min. The solution was stirred for 15 h at rt and then concentrated under reduced pressure. The residue was purified by flash column chromatography to give *N*-propargylamides **S2**.

**Preparation of S3:** To a solution of *N*-propargylamides **S2** (1.0 equiv.) in CH<sub>3</sub>CN (2 mL) was added *p*-TsN<sub>3</sub> (1.0 equiv.) and K<sub>2</sub>CO<sub>3</sub> (1.12 equiv.) and the reaction mixture was stirred at room temperature. After the starting material was consumed (monitored by TLC), the mixture was filtered and concentrated under reduced pressure. The residue was purified by flash column chromatography to afford the diazo transfer product **S3**.

**Preparation of S4:** Diazoamide **S3** (1.0 equiv.) was dissolved in MeCN (1 mL/mmol) and KOH (8% aqueous solution, 1 mL/mmol) was added dropwise over 5 min. The reaction mixture was stirred for 1 hour (monitored by TLC). The reaction mixture was concentrated under reduced pressure and extracted with ethyl acetate. The combined organic layer was washed with sat. NH<sub>4</sub>Cl, dried over anhydrous Na<sub>2</sub>SO<sub>4</sub>, and concentrated under reduced pressure. The residue was purified by flash column chromatography to afford diazoamide **S4**.

Diazoacetates **S6** were synthesized following the reported procedure by Tohru Fukuyama and co-workers.<sup>3</sup>

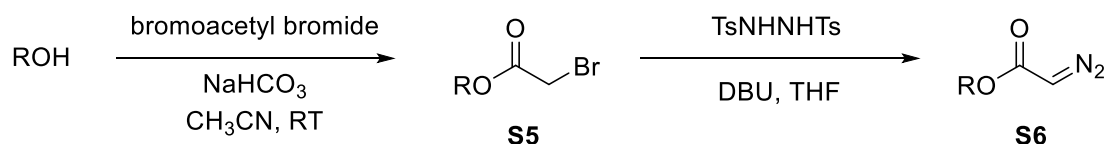

**Preparation of S5:** Bromoacetyl bromide (1.31 mL, 15 mmol, 1.5 equiv.) was added slowly to a mixture of alcohol (10 mmol, 1.0 equiv.) and NaHCO<sub>3</sub> (2.52 g, 30 mmol, 3.0 equiv.) in CH<sub>3</sub>CN (50 mL) at 0 °C. After stirring for 10 min at the temperature, the reaction was quenched with H<sub>2</sub>O. The mixture was extracted with CH<sub>2</sub>Cl<sub>2</sub> three times. The combined organic phase was washed with brine and dried over Na<sub>2</sub>SO<sub>4</sub>. The solvent was removed under reduced pressure and the residue was purified by flash column chromatography to afford the bromoacetate.

**Preparation of S6:** The bromoacetate (1.0 mmol, 1.0 equiv.) and *N,N'*-ditosylhydrazine (681 mg, 2.0 mmol) were dissolved in THF (5.0 mL) and cooled to 0 °C. DBU (0.75 mL, 5.0 mmol)

<sup>3</sup> Toma, T.; Shimokawa, J.; Fukuyama, T. *N,N'*-Ditosylhydrazine: A Convenient Reagent for Facile Synthesis of Diazoacetates. *Org. Lett.* **2007**, *9*, 3195.

was added dropwise and stirred at the temperature for 30 minutes (monitored by TLC). After the quenching of the reaction by the addition of saturated NaHCO<sub>3</sub> solution, this mixture was extracted with Et<sub>2</sub>O three times. The organic phase was washed with brine, dried over Na<sub>2</sub>SO<sub>4</sub> and evaporated to give the crude diazoacetate. Purification of the crude diazoacetate was performed with neutral silica gel to give 3-phenylpropyl 2-diazoacetate.

### III. General Procedure for the Three-component Coupling Reaction

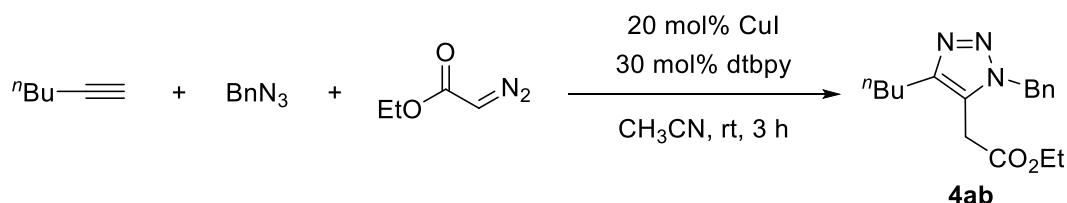

1-Hexyne (16 mg, 0.2 mmol), benzyl azide (53.3 mg, 0.4 mmol, 2.0 equiv.) and ethyl diazoacetate (68.7 mg, 0.6 mmol, 3.0 equiv.) were dissolved in dry CH<sub>3</sub>CN (1.0 mL), then dtbpy (16.1 mg, 0.06 mmol, 0.3 equiv.) and CuI (7.6 mg, 0.04 mmol, 0.2 equiv.) were added and the reaction mixture was stirred under N<sub>2</sub> atmosphere for 3 h. On completion of the reaction, 1 mL of aq. NH<sub>4</sub>Cl and 1 mL of ethyl acetate were added to the reaction mixture and stirred for 5 min. Then reaction mixture was diluted with EtOAc (10 mL) and organic layer was separated and washed with brine. This organic layer dried over Na<sub>2</sub>SO<sub>4</sub>, filtered and concentrated under reduced pressure to afford the crude material. The crude material was purified by using flash column chromatography to afford product **4ab**.

### IV. General Procedure for the Synthesis of Cyclic Triazoles

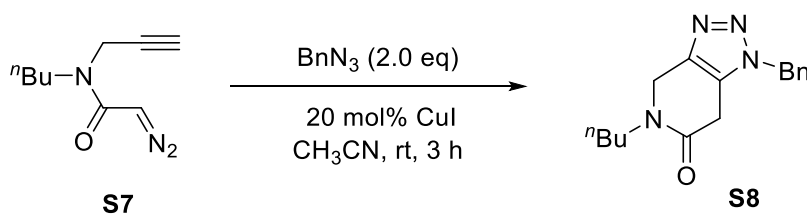

Diazoamide **S7** (35.8 mg, 0.2 mmol), benzyl azide (53.3 mg, 0.4 mmol, 2.0 equiv.) were dissolved in dry CH<sub>3</sub>CN (1.0 mL) and CuI (7.6 mg, 0.04 mmol, 0.2 equiv.) were added, and the reaction mixture was stirred under N<sub>2</sub> atmosphere for 3 h. On completion of the reaction, 1 mL of aq. NH<sub>4</sub>Cl and 1 mL of ethyl acetate were added to the reaction mixture and stirred for 5 min. Then reaction mixture was diluted with EtOAc (10 mL) and organic layer was separated and washed with brine. This organic layer dried over Na<sub>2</sub>SO<sub>4</sub>, filtered and concentrated under reduced pressure to afford the crude material. The crude material was purified by using flash column chromatography to afford product **S8**.

## V. Characterization Data

**Ethyl 2-(1-benzyl-4-butyl-1H-1,2,3-triazol-5-yl)acetate (4ab):** The compound **4ab** was

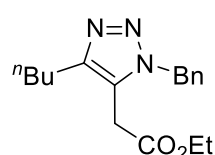

prepared according to the general procedure and was purified by flash column chromatography (hexane: ethyl acetate = 5:1 to 1:1). **4ab** was obtained as a yellow oil (40.0 mg, 66% yield). <sup>1</sup>H NMR (500 MHz, CDCl<sub>3</sub>) δ 7.31 (t, *J* = 7.8 Hz, 3H), 7.14 (d, *J* = 6.7 Hz, 2H), 5.57 (s, 2H), 4.04 (q, *J* = 7.1 Hz, 2H), 3.44 (s, 2H), 2.61 (t, *J* = 7.7 Hz, 2H), 1.69–1.61 (m, 2H), 1.37–1.32 (m, 2H), 1.18 (t, *J* = 7.1 Hz, 3H), 0.91 (t, *J* = 7.3 Hz, 3H); <sup>13</sup>C NMR (126 MHz, CDCl<sub>3</sub>) δ 168.28, 147.35, 134.92, 129.09, 128.46, 127.41, 126.25, 61.75, 52.47, 31.69, 28.96, 24.88, 22.50, 14.13, 13.96; HRMS (ESI) calcd for C<sub>17</sub>H<sub>24</sub>N<sub>3</sub>O<sub>2</sub> [M + H]<sup>+</sup> 302.1869, found 302.1865.

**Ethyl 2-(1-benzyl-4-hexyl-1H-1,2,3-triazol-5-yl)acetate (4b):** The compound **4b** was

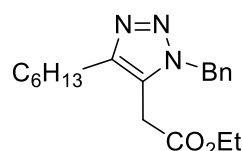

prepared according to the general procedure and was purified by flash column chromatography (hexane: ethyl acetate = 2:1). **4b** was obtained as a light-yellow oil (50.8 mg, 77%). <sup>1</sup>H NMR (500 MHz, CDCl<sub>3</sub>) δ 7.35–7.28 (m, 3H), 7.14 (d, *J* = 6.7 Hz, 2H), 5.56 (s, 2H), 4.03 (q, *J* = 6.9 Hz, 2H), 3.43 (s, 2H), 2.60 (t, *J* = 7.6 Hz, 2H), 1.70–1.62 (m, 2H), 1.35–1.24 (m, 8H), 1.18 (t, *J* = 7.0 Hz, 3H), 0.86 (t, *J* = 6.9 Hz, 3H); <sup>13</sup>C NMR (126 MHz, CDCl<sub>3</sub>) δ 168.26, 147.37, 134.91, 129.07, 128.44, 127.38, 126.23, 61.73, 52.46, 31.70, 29.53, 29.09, 28.95, 25.19, 22.66, 14.16, 14.13; HRMS (ESI) calcd for C<sub>19</sub>H<sub>27</sub>N<sub>3</sub>O<sub>2</sub> [M + H]<sup>+</sup> 330.2182, found 330.2179.

**Ethyl 2-(1-benzyl-4-(trimethylsilyl)-1H-1,2,3-triazol-5-yl)acetate (4c):** The compound **4c**

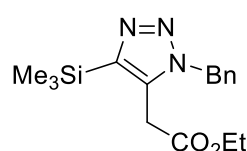

was prepared according to the general procedure and was purified by flash column chromatography (hexane: ethyl acetate = 2:1). **4c** was obtained as a light-yellow oil (37.8 mg, 60% yield). <sup>1</sup>H NMR (500 MHz, C<sub>6</sub>D<sub>6</sub>) δ 7.36 (dd, *J* = 14.5, 7.8 Hz, 3H), 7.19 (d, *J* = 6.8 Hz, 2H), 5.64 (s, 2H), 4.05 (q, *J* = 7.1 Hz, 2H), 3.60 (s, 2H), 1.20 (t, *J* = 7.1 Hz, 3H), 0.36 (s, 9H); <sup>13</sup>C NMR (126 MHz, C<sub>6</sub>D<sub>6</sub>) δ 168.22, 145.84, 135.21, 134.89, 129.01, 128.38, 127.45, 61.72, 51.74, 29.91, 14.07, –0.92; HRMS (ESI) calcd for C<sub>16</sub>H<sub>24</sub>N<sub>3</sub>O<sub>2</sub>Si [M + H]<sup>+</sup> 318.1638, found 318.1639.

**Ethyl 2-(1-benzyl-4-(3-hydroxypropyl)-1H-1,2,3-triazol-5-yl)acetate (4d):** The compound

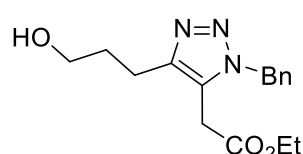

**4d** was prepared according to the general procedure and was purified by flash column chromatography (hexane: ethyl acetate = 1:1 to acetone). **4d** was obtained as a green oil (38.6 mg, 64% yield). <sup>1</sup>H NMR (500 MHz, CDCl<sub>3</sub>) δ 7.36–7.29 (m, 3H), 7.14 (d, *J* = 6.8 Hz, 2H), 5.56 (s, 2H), 4.02 (q, *J* = 7.0 Hz, 2H), 3.81–3.58 (m, 2H), 3.51 (s, 2H), 2.80–2.72 (m, 2H), 2.00–1.91 (m, 2H), 1.18 (t, *J* = 7.1 Hz, 3H), 1.12 (s, 1H); <sup>13</sup>C NMR (126 MHz, CDCl<sub>3</sub>) δ

168.24, 134.51, 129.10, 129.02, 128.45, 127.31, 61.80, 61.43, 52.62, 31.40, 28.92, 21.30, 14.03; HRMS (ESI) calcd for C<sub>16</sub>H<sub>22</sub>N<sub>3</sub>O<sub>2</sub> [M + H]<sup>+</sup> 304.1661, found 304.1663.

**1-Benzyl-4-(3-(benzyloxy)propyl)-5-(2-(ethylperoxy)-2λ<sup>2</sup>-ethyl)-1H-1,2,3-triazole (4e):**

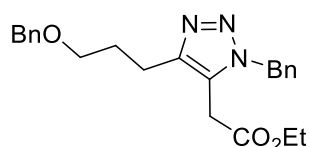

The compound **4e** was prepared according to the general procedure and was purified by flash column chromatography (hexane: ethyl acetate = 1:1). **4e** was obtained as a yellow oil (59.0 mg, 75% yield). <sup>1</sup>H NMR (500 MHz, CDCl<sub>3</sub>) δ 7.35–7.24 (m, 8H), 7.14 (d, *J* = 6.3 Hz, 2H), 5.55 (s, 2H), 4.46 (s, 2H), 4.01 (q, *J* = 7.1 Hz, 2H), 3.50 (t, *J* = 6.1 Hz, 2H), 3.43 (s, 2H), 2.74 (t, *J* = 7.4 Hz, 2H), 2.06–1.96 (m, 1H), 1.17 (t, *J* = 7.1 Hz, 3H); <sup>13</sup>C NMR (126 MHz, CDCl<sub>3</sub>) δ 168.27, 146.65, 138.67, 134.85, 129.10, 128.64, 128.49, 128.47, 128.08, 127.82, 127.71, 127.62, 127.41, 126.66, 72.88, 69.32, 61.73, 52.52, 29.28, 28.78, 21.61, 14.13; HRMS (ESI) calcd for C<sub>23</sub>H<sub>28</sub>N<sub>3</sub>O<sub>2</sub> [M + H]<sup>+</sup> 394.2131, found 394.2131.

**Ethyl 2-(1-benzyl-4-(3-((*tert*-butyldimethylsilyl)oxy)propyl)-1H-1,2,3-triazol-5-yl)acetate (4f):**

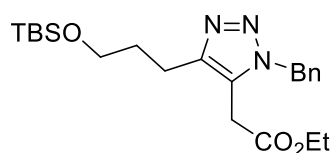

The compound **4f** was prepared according to the general procedure and was purified by flash column chromatography (hexane: ethyl acetate = 3:1). **4f** was obtained as a yellow oil (54.0 mg, 65% yield). <sup>1</sup>H NMR (500 MHz, CDCl<sub>3</sub>) δ 7.35–7.28 (m, 3H), 7.13 (d, *J* = 6.4 Hz, 2H), 5.55 (s, 2H), 4.03 (q, *J* = 7.1 Hz, 2H), 3.61 (t, *J* = 5.7 Hz, 2H), 3.46 (s, 2H), 2.70 (t, *J* = 7.5 Hz, 2H), 1.91–1.84 (m, 2H), 1.18 (t, *J* = 7.1 Hz, 3H), 0.87 (s, 9H), 0.01 (s, 6H); <sup>13</sup>C NMR (126 MHz, CDCl<sub>3</sub>) δ 168.26, 146.85, 134.85, 129.07, 128.45, 127.39, 126.63, 62.06, 61.69, 52.50, 32.39, 28.78, 26.03, 22.20, 21.22, 14.12, –5.21; HRMS (ESI) calcd for C<sub>22</sub>H<sub>36</sub>N<sub>3</sub>O<sub>3</sub>Si [M + H]<sup>+</sup> 418.2526, found 413.2518.

**Ethyl 2-(4-(3-((*tert*-butyldimethylsilyl)oxy)propyl)-1-octyl-1H-1,2,3-triazol-5-yl)acetate (4f')**

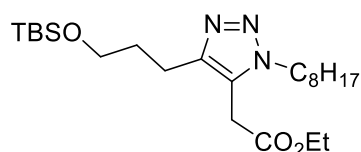

The compound **4f'** was prepared according to the general procedure and was purified by flash column chromatography (hexane: ethyl acetate = 1:1). **4f'** was obtained as a yellow oil (40.1 mg, 61% yield). <sup>1</sup>H NMR (500 MHz, CDCl<sub>3</sub>) δ 4.21 (t, *J* = 7.4 Hz, 2H), 4.14 (q, *J* = 7.1 Hz, 2H), 3.64 (s, 2H), 3.61 (t, *J* = 6.05 Hz, 4H), 2.70 (t, *J* = 7.5 Hz, 2H), 1.86 (m, 4H), 1.33–1.18 (m, 13H), 0.9–0.82 (m, 12H), 0.02 (s, 6H); <sup>13</sup>C NMR (125 MHz, CDCl<sub>3</sub>) δ 168.2, 145.8, 126.0, 61.9, 61.6, 48.3, 32.3, 31.7, 29.6, 29.0, 28.7, 26.6, 25.9, 22.5, 21.1, 18.2, 14.0, –5.3; HRMS (ESI) calcd for C<sub>23</sub>H<sub>46</sub>N<sub>3</sub>O<sub>3</sub>Si [M + H]<sup>+</sup> 440.3308, found 440.3298.

**Ethyl 2-(1-benzyl-4-(hydroxymethyl)-1*H*-1,2,3-triazol-5-yl)acetate (4g):** The compound **4g** was prepared according to the general procedure and was purified by flash column chromatography (ethyl acetate). **4g** was obtained as a brown oil (141.0 mg, 71% yield). <sup>1</sup>H NMR (500 MHz, CDCl<sub>3</sub>) δ 7.36–7.29 (m, 3H), 7.15 (d, *J* = 6.1 Hz, 2H), 5.57 (s, 2H), 4.77 (s, 2H), 4.03 (q, *J* = 6.8 Hz, 2H), 3.62 (s, 2H), 2.45 (brs, 1H), 1.18 (t, *J* = 7.0 Hz, 3H); <sup>13</sup>C NMR (126 MHz, CDCl<sub>3</sub>) δ 168.39, 146.78, 134.42, 129.18, 128.66, 128.15, 127.43, 62.07, 56.48, 52.59, 28.94, 14.09; HRMS (ESI) calcd for C<sub>14</sub>H<sub>18</sub>N<sub>3</sub>O<sub>3</sub> [M + H]<sup>+</sup> 276.1348, found 276.1349.

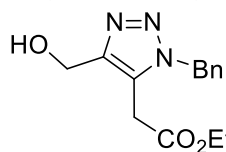

**Ethyl 2-(4-(hydroxymethyl)-1-octyl-1*H*-1,2,3-triazol-5-yl)acetate (4g'):** The compound **4g'** was prepared according to the general procedure and was purified by flash column chromatography (hexane: ethyl acetate = 1:1 to 1:2). **4g'** was obtained as a light-yellow oil (83.0 mg, 70% yield). <sup>1</sup>H NMR (500 MHz, CDCl<sub>3</sub>) δ 4.75 (s, 2H), 4.24 (t, *J* = 7.2 Hz, 2H), 4.17 (q, *J* = 7.0 Hz, 2H), 3.78 (s, 2H), 2.81 (s, 1H), 1.90–1.81 (m, 2H), 1.32–1.29 (m, 3H), 1.28–1.21 (m, 10H), 0.86 (t, *J* = 6.5 Hz, 3H); <sup>13</sup>C NMR (126 MHz, CDCl<sub>3</sub>) δ 168.54, 146.41, 127.96, 62.10, 56.33, 48.54, 31.77, 30.04, 29.10, 29.09, 28.98, 26.66, 22.65, 14.14, 14.12; HRMS (ESI) calcd for C<sub>15</sub>H<sub>28</sub>N<sub>3</sub>O<sub>3</sub> [M + H]<sup>+</sup> 298.2131, found 298.2129.

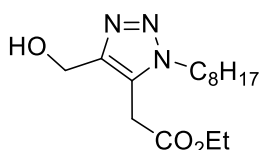

**Ethyl 2-(1-benzyl-4-(((*tert*-butyldimethylsilyl)oxy)methyl)-1*H*-1,2,3-triazol-5-yl)acetate (4h):** The compound **4h** was prepared according to the general procedure and was purified by flash column chromatography (hexane: ethyl acetate = 5:1). **4h** was obtained as a yellow oil (59.7 mg, 77% yield). <sup>1</sup>H NMR (500 MHz, CDCl<sub>3</sub>) δ 4.82 (s, 2H), 4.14 (q, *J* = 6.9 Hz, 2H), 3.78 (s, 2H), 3.60 (s, 2H), 1.24 (t, *J* = 7.0 Hz, 3H), 0.87 (s, 9H), 0.18 (s, 9H), 0.06 (s, 6H); <sup>13</sup>C NMR (126 MHz, CDCl<sub>3</sub>) δ 168.51, 144.94, 128.42, 61.60, 58.25, 38.87, 29.02, 25.98, 14.23, –1.70, –5.29; HRMS (ESI) calcd for C<sub>20</sub>H<sub>32</sub>N<sub>3</sub>O<sub>3</sub>Si [M + H]<sup>+</sup> 390.2213, found 390.2206.

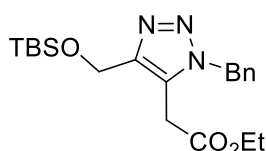

**Ethyl 2-(4-(((*tert*-butyldimethylsilyl)oxy)methyl)-1-((trimethylsilyl)methyl)-1*H*-1,2,3-triazol-5-yl)acetate (4h'):** The compound **4h'** was prepared according to the general procedure and was purified by flash column chromatography (hexane: ethyl acetate = 1:1). **4h'** was obtained as a yellow oil (59.7 mg, 77% yield). <sup>1</sup>H NMR (500 MHz, CDCl<sub>3</sub>) δ 4.83 (s, 2H), 4.15 (q, *J* = 7.1 Hz, 2H), 3.79 (s, 2H), 3.60 (s, 2H), 1.25 (t, *J* = 7.1 Hz, 3H), 0.88 (s, 9H), 0.19 (s, 9H), 0.07 (s, 6H); <sup>13</sup>C NMR (125 MHz, CDCl<sub>3</sub>) δ 168.4, 144.8, 128.3, 61.5, 58.1, 38.7, 28.9, 25.9, 18.3, 14.1, –1.7, –5.3; HRMS (ESI) calcd for C<sub>17</sub>H<sub>36</sub>N<sub>3</sub>O<sub>3</sub>Si<sub>2</sub> [M + H]<sup>+</sup> 386.2295, found 386.2286.

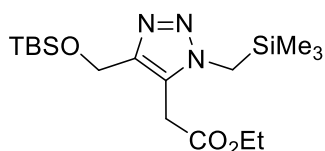

**Ethyl 2-(1-benzyl-4-(1-hydroxyethyl)-1*H*-1,2,3-triazol-5-yl)acetate (4i')**: The compound **4i**

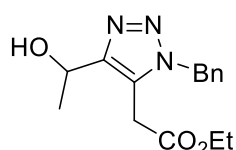

was prepared according to the general procedure and converted to **4i'** after purification. **4i'** was purified by flash column chromatography (hexane: ethyl acetate = 1:1). **4i'** was obtained as a light-yellow oil (45.7 mg, 79% yield). <sup>1</sup>H NMR (500 MHz, CDCl<sub>3</sub>) δ 7.35–7.27 (m, 3H), 7.14 (d, *J* = 6.4 Hz, 2H), 5.54 (s, 2H), 5.08–5.01 (m, 1H), 4.00 (q, *J* = 7.0 Hz, 2H), 3.66 (s, 2H), 2.48 (brs, 1H), 1.62 (d, *J* = 6.4 Hz, 3H), 1.16 (t, *J* = 7.1 Hz, 3H); <sup>13</sup>C NMR (126 MHz, CDCl<sub>3</sub>) δ 168.69, 150.03, 134.52, 129.13, 128.59, 127.41, 126.71, 63.67, 61.96, 52.40, 29.03, 23.31, 14.07; HRMS (ESI) calcd for C<sub>15</sub>H<sub>20</sub>N<sub>3</sub>O<sub>3</sub> [M + H]<sup>+</sup> 290.1505, found 290.1506.

**Ethyl (*E*)-2-(1-benzyl-4-(1-((*tert*-butyldimethylsilyl)oxy)-3,7-dimethylocta-2,6-dien-1-yl)-1*H*-1,2,3-triazol-5-yl)acetate (4j)**: The compound **4j** was prepared

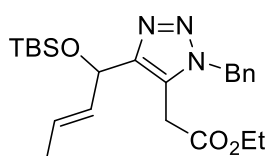

according to the general procedure and was purified by flash column chromatography (hexane: ethyl acetate = 5:1). **4j** was obtained as a mixture of triazole, light-yellow oil (66.3 mg, 45% yield of **4j**). Characteristic data for **4j**: <sup>1</sup>H NMR (500 MHz, CDCl<sub>3</sub>) δ 7.12 (d, *J* = 6.2 Hz, 2H), 5.49 (s, 2H), 4.08 – 3.98 (m, 2H), 3.75 (d, *J* = 17.4 Hz, 1H), 3.53 (d, *J* = 17.4 Hz, 1H), 1.64 (d, *J* = 6.3 Hz, 3H), 1.18 (t, *J* = 7.1 Hz, 3H), 0.81 (s, 9H), –0.02 (s, 3H), –0.08 (s, 3H); <sup>13</sup>C NMR (126 MHz, CDCl<sub>3</sub>) δ 168.47, 148.72, 132.65, 129.03, 127.37, 126.36, 125.61, 69.86, 61.51, 52.38, 28.78, 25.90, 17.57, 14.13, –4.83; HRMS (ESI) calcd for C<sub>23</sub>H<sub>36</sub>N<sub>3</sub>O<sub>3</sub>Si [M + H]<sup>+</sup> 430.2526, found 430.2517.

**Ethyl 2-(1-benzyl-4-(((3*aS*,7*aS*)-3-oxo-1,4,7,7*a*-tetrahydroisobenzofuran-3*a*(3*H*)-yl)methyl)-1*H*-1,2,3-triazol-5-yl)acetate (4k)**: The compound **4k**

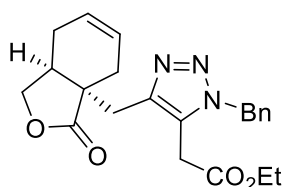

was prepared according to the general procedure and was purified by flash column chromatography (hexane: ethyl acetate = 5:1 to 1:1). **4k** was obtained as a light-yellow oil (43.5 mg, 55% yield). <sup>1</sup>H NMR (500 MHz, CDCl<sub>3</sub>) δ 7.37–7.27 (m, 3H), 7.10 (d, *J* = 7.2 Hz, 2H), 5.85–5.79 (m, 1H), 5.78–5.72 (m, 1H), 5.58 (d, *J* = 15.6 Hz, 1H), 5.41 (d, *J* = 15.6 Hz, 1H), 4.14 (t, *J* = 8.3 Hz, 1H), 4.02 (t, *J* = 7.1 Hz, 2H), 3.85 (t, *J* = 9.4 Hz, 1H), 3.69 (d, *J* = 17.5 Hz, 1H), 3.56 (d, *J* = 17.5 Hz, 1H), 3.05–2.94 (m, 2H), 2.94–2.87 (m, 1H), 2.63–2.53 (m, 1H), 2.35–2.29 (m, 1H), 2.11–2.04 (m, 1H), 2.02–1.92 (m, 1H), 1.17 (t, *J* = 7.1 Hz, 3H); <sup>13</sup>C NMR (126 MHz, CDCl<sub>3</sub>) δ 181.35, 168.40, 142.61, 134.51, 129.07, 128.99, 128.51, 127.41, 125.51, 123.58, 70.44, 61.64, 52.59, 44.70, 34.91, 29.60, 29.55, 28.58, 22.19, 14.08; HRMS (ESI) calcd for C<sub>22</sub>H<sub>26</sub>N<sub>3</sub>O<sub>4</sub> [M + H]<sup>+</sup> 396.1923, found 396.1921.



**Ethyl 2-(4-(((3*a*S,7*a*S)-3-oxo-1,4,7,7*a*-tetrahydroisobenzofuran-3*a*(3*H*)-yl)methyl)-1-((trimethylsilyl)methyl)-1*H*-1,2,3-triazol-5-yl)acetate (**4k'**):**

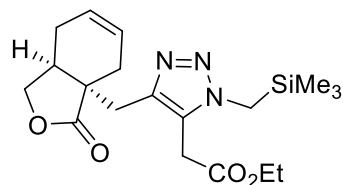

The compound **4k'** was prepared according to the general procedure and was purified by flash column chromatography (hexane: ethyl acetate = 5: 1 to 1:1). **4k'** was obtained as a light-yellow oil (35.2 mg, 45% yield). <sup>1</sup>H NMR (500 MHz, CDCl<sub>3</sub>) δ

5.86–5.75 (m, 2H), 4.21–4.10 (m, 3H), 3.97–3.84 (m, 2H), 3.66 (d, *J* = 17.4 Hz, 1H), 3.54 (s, 2H), 3.05–2.91 (m, 3H), 2.63–2.55 (m, 1H), 2.34 (d, *J* = 17.6 Hz, 1H), 2.14–2.06 (m, 1H), 1.98 (d, *J* = 18.1 Hz, 1H), 1.26 (t, *J* = 7.1 Hz, 3H), 0.18 (s, 9H); <sup>13</sup>C NMR (126 MHz, CDCl<sub>3</sub>) δ 181.50, 168.77, 141.25, 129.46, 125.52, 123.62, 70.48, 61.68, 44.80, 39.05, 34.82, 29.66, 28.83, 22.18, 14.25, -1.62; HRMS (ESI) calcd for C<sub>19</sub>H<sub>30</sub>N<sub>3</sub>O<sub>4</sub>Si [M + H]<sup>+</sup> 392.2006, found 392.1996.

**2,5-Dioxopyrrolidin-1-yl**

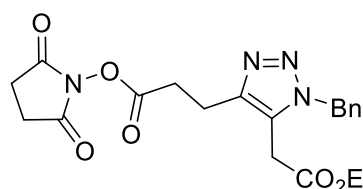

**3-(1-benzyl-5-(2-ethoxy-2-oxoethyl)-1*H*-1,2,3-triazol-4-yl)propanoate (**4l**):**

The compound **4l** was prepared according to the general procedure and was purified by flash column chromatography (hexane: ethyl acetate = 1:1 to 1:2).

**4l** was obtained as a yellow oil (60.1 mg, 73% yield). <sup>1</sup>H NMR (500 MHz, CDCl<sub>3</sub>) δ 7.31 (t, *J* = 7.9 Hz, 3H), 7.13 (d, *J* = 7.1 Hz, 2H), 5.56 (s, 2H), 4.02 (q, *J* = 7.1 Hz, 2H), 3.50 (s, 2H), 3.12 (t, *J* = 6.9 Hz, 2H), 3.04 (t, *J* = 7.5 Hz, 2H), 2.81 (s, 4H), 1.17 (t, *J* = 7.1 Hz, 3H); <sup>13</sup>C NMR (126 MHz, CDCl<sub>3</sub>) δ 168.99, 168.29, 167.98, 144.26, 134.62, 129.13, 128.52, 127.40, 127.23, 61.86, 52.58, 30.60, 28.83, 25.70, 20.15, 14.12; HRMS (ESI) calcd for C<sub>16</sub>H<sub>20</sub>N<sub>3</sub>O<sub>4</sub> [M – OSu + H]<sup>+</sup> 318.1454, found 318.1454.

**Ethyl 1-benzyl-5-(2-ethoxy-2-oxoethyl)-1*H*-1,2,3-triazole-4-carboxylate (**4m**):**

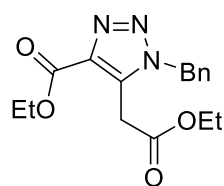

The compound **4m** was prepared according to the general procedure and was purified by flash column chromatography (hexane: ethyl acetate = 3:1 to 1:1). **4m** was obtained as a mixture of triazole, yellow oil (80.0 mg, 30% yield of **4m**). Characteristic data for **4m**:

<sup>1</sup>H NMR (500 MHz, CDCl<sub>3</sub>) δ 5.57 (s, 2H), 4.00 (q, *J* = 7.1 Hz, 2H), 3.90 (s, 2H), 1.12 (t, *J* = 7.0 Hz, 3H); <sup>13</sup>C NMR (126 MHz, CDCl<sub>3</sub>) δ 167.19, 161.29, 140.53, 129.23, 129.09, 128.21, 127.34, 61.75, 54.38, 52.53, 29.24, 13.95; HRMS (ESI) calcd for C<sub>16</sub>H<sub>20</sub>N<sub>3</sub>O<sub>4</sub> [M + H]<sup>+</sup> 318.1454, found 318.1454.

**Ethyl 2-(1-benzyl-4-((N-(but-3-en-1-yl)-4-methylphenyl)sulfonamido)-1*H*-1,2,3-triazol-5-yl)acetate (**4n**):**

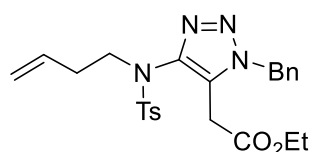

The compound **4n** was prepared according to the general procedure and was purified by flash column chromatography (hexane: ethyl acetate = 2:1). **4n** was obtained as a yellow oil (48.9 mg, 52% yield). <sup>1</sup>H NMR (500 MHz, CDCl<sub>3</sub>) δ

7.50 (d, *J* = 8.1 Hz, 2H), 7.39–7.34 (m, 3H), 7.27 (d, *J* = 7.7 Hz, 2H), 7.15 (d, *J* = 6.5 Hz, 2H),

5.62 (s, 2H), 4.94–4.87 (m, 2H), 4.13 (q,  $J = 7.1$  Hz, 2H), 3.67 (t,  $J = 7.0$  Hz, 2H), 3.61 (s, 2H), 2.41 (s, 3H), 2.15 (q,  $J = 6.6$  Hz, 2H), 1.24 (t,  $J = 7.1$  Hz, 3H);  $^{13}\text{C}$  NMR (126 MHz,  $\text{CDCl}_3$ )  $\delta$  168.19, 144.12, 143.01, 134.74, 134.50, 134.20, 129.75, 129.25, 128.76, 128.06, 127.44, 119.77, 116.98, 61.77, 53.63, 49.53, 32.62, 28.85, 21.74, 14.20; HRMS (ESI) calcd for  $\text{C}_{24}\text{H}_{29}\text{N}_4\text{O}_4\text{S}$   $[\text{M} + \text{H}]^+$  469.1910, found 469.1900.

**Ethyl 2-(1-benzyl-4-((4-phenyl-1*H*-1,2,3-triazol-1-yl)methyl)-1*H*-1,2,3-triazol-5-**

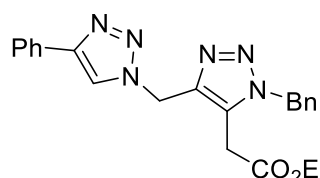

**yl)acetate (4o):** The compound **4o** was prepared according to the general procedure and was purified by flash column chromatography (hexane: ethyl acetate = 1:1 to 1:2). **4o** was obtained as a brown oil (56.3 mg, 70% yield).  $^1\text{H}$  NMR (500

MHz,  $\text{CDCl}_3$ )  $\delta$  7.91 (s, 1H), 7.77 (d,  $J = 7.3$  Hz, 2H), 7.38 (t,  $J = 7.1$  Hz, 2H), 7.32–7.27 (m, 4H), 7.14 (d,  $J = 5.7$  Hz, 2H), 5.67 (s, 2H), 5.54 (s, 2H), 3.93 (q,  $J = 6.8$  Hz, 2H), 3.64 (s, 2H), 1.08 (t,  $J = 6.9$  Hz, 3H);  $^{13}\text{C}$  NMR (126 MHz,  $\text{CDCl}_3$ )  $\delta$  167.34, 148.24, 140.99, 133.84, 130.45, 129.63, 129.16, 128.84, 128.74, 128.22, 127.46, 125.68, 119.87, 62.00, 52.77, 45.00, 28.62, 13.91; HRMS (ESI) calcd for  $\text{C}_{22}\text{H}_{23}\text{N}_6\text{O}_2$   $[\text{M} + \text{H}]^+$  403.1882, found 403.1875.

**Ethyl 2-(1-benzyl-4-(pyridin-2-yl)-1*H*-1,2,3-triazol-5-yl)acetate (4p):** The compound **4p**

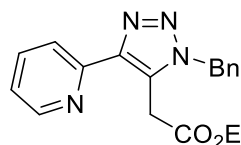

was prepared according to the general procedure and was purified by flash column chromatography (hexane: ethyl acetate = 1:1). **4p** was obtained as light-yellow solid (24.9 mg, 37% yield).  $^1\text{H}$  NMR (500

MHz,  $\text{CDCl}_3$ )  $\delta$  8.51 (d,  $J = 4.0$  Hz, 1H), 8.22 (d,  $J = 7.9$  Hz, 1H), 7.74 (t,  $J = 7.7$  Hz, 1H), 7.36–7.28 (m, 3H), 7.20 (d,  $J = 7.0$  Hz, 2H), 7.17–7.13 (m, 1H), 5.62 (s, 2H), 4.22 (s, 2H), 4.03 (q,  $J = 7.1$  Hz, 2H), 1.14 (t,  $J = 7.1$  Hz, 3H);  $^{13}\text{C}$  NMR (126 MHz,  $\text{CDCl}_3$ )  $\delta$  168.71, 151.59, 148.96, 144.96, 136.68, 134.56, 129.43, 129.14, 128.57, 127.42, 122.33, 120.95, 61.43, 52.42, 30.02, 14.15; HRMS (ESI) calcd for  $\text{C}_{18}\text{H}_{19}\text{N}_4\text{O}_2$   $[\text{M} + \text{H}]^+$  323.1508, found 323.1505.

**Ethyl 2-(1-benzyl-4-(pyridin-3-yl)-1*H*-1,2,3-triazol-5-yl)acetate (4q):** The compound **4q**

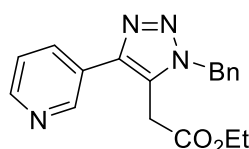

was prepared according to the general procedure and was purified by flash column chromatography (hexane: ethyl acetate = 1:5). **4q** was obtained as a mixture of triazole, light-yellow solid (43.2 mg, 22% yield of **4q**). Characteristic data for **4q**:  $^1\text{H}$  NMR (500 MHz,  $\text{CDCl}_3$ )  $\delta$

8.10 (d,  $J = 5.4$  Hz, 1H), 7.21 (d,  $J = 6.7$  Hz, 2H), 5.66 (s, 2H), 4.06 (q,  $J = 6.9$  Hz, 2H), 3.66 (s, 2H), 1.18 (t,  $J = 6.9$  Hz, 3H);  $^{13}\text{C}$  NMR (126 MHz,  $\text{CDCl}_3$ )  $\delta$  167.76, 148.99, 146.80, 145.69, 144.22, 134.17, 128.97, 128.18, 127.46, 62.14, 52.72, 29.54, 14.05; HRMS (ESI) calcd for  $\text{C}_{18}\text{H}_{19}\text{N}_4\text{O}_2$   $[\text{M} + \text{H}]^+$  323.1508, found 323.1505.

**Ethyl 2-(4-butyl-1-octyl-1*H*-1,2,3-triazol-5-yl)acetate (5a):** The compound **5a** was prepared

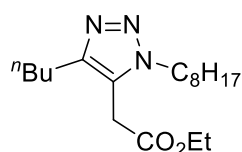

according to the general procedure and was purified by flash column chromatography (hexane: ethyl acetate = 2:1). **5a** was obtained as a light-yellow oil (40.0 mg, 62% yield). <sup>1</sup>H NMR (500 MHz, CDCl<sub>3</sub>) δ 4.22 (t, *J* = 7.3 Hz, 2H), 4.15 (q, *J* = 6.9 Hz, 2H), 3.61 (s, 2H), 2.62 (t, *J* = 7.5 Hz, 2H), 1.90–1.82 (m, 2H), 1.68–1.60 (m, 2H), 1.39–1.21 (m, *J* = 24.9, 13.9, 7.0 Hz, 20H), 0.91 (t, *J* = 7.2 Hz, 3H), 0.86 (t, *J* = 6.3 Hz, 3H); <sup>13</sup>C NMR (126 MHz, CDCl<sub>3</sub>) δ 168.43, 146.45, 125.80, 61.83, 48.49, 31.83, 31.69, 30.12, 29.18, 29.06, 26.77, 24.89, 22.71, 22.52, 14.17, 13.96; HRMS (ESI) calcd for C<sub>18</sub>H<sub>34</sub>N<sub>3</sub>O [M + H]<sup>+</sup> 324.2651, found 324.2648.

**Ethyl 2-(4-butyl-1-((trimethylsilyl)methyl)-1*H*-1,2,3-triazol-5-yl)acetate (5b):** The

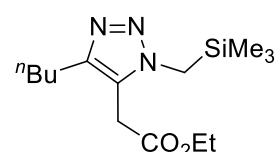

compound **5b** was prepared according to the general procedure and was purified by flash column chromatography (hexane: ethyl acetate = 5:1 to 1:1). **5b** was obtained as a light-yellow oil (41.0 mg, 69% yield). <sup>1</sup>H NMR (500 MHz, CDCl<sub>3</sub>) δ 4.11 (q, *J* = 7.1 Hz, 2H), 3.57 (s, 2H), 3.56 (s, 2H), 2.56 (t, *J* = 7.6 Hz, 2H), 1.61 (q, *J* = 7.3 Hz, 2H), 1.31 (m, 2H), 1.20 (t, *J* = 7.1 Hz, 3H), 0.87 (t, *J* = 7.3 Hz, 3H), 0.14 (s, 9H); <sup>13</sup>C NMR (125 MHz, CDCl<sub>3</sub>) δ 168.3, 145.6, 126.4, 61.5, 38.8, 31.4, 29.0, 24.8, 22.3, 14.0, 13.8, -1.7; HRMS (ESI) calcd for C<sub>14</sub>H<sub>28</sub>N<sub>3</sub>O<sub>2</sub>Si [M + H]<sup>+</sup> 298.1951, found 298.1953.

**Ethyl 2-(1-(but-2-en-1-yl)-4-butyl-1*H*-1,2,3-triazol-5-yl)acetate (5c):** The compound **5c** was

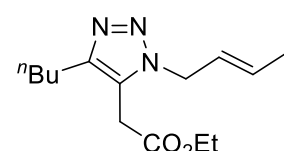

prepared according to the general procedure and was purified by flash column chromatography (hexane: ethyl acetate = 1:1 to 2:1). **5c** was obtained as a light-yellow oil (21.5 mg, 40% yield). <sup>1</sup>H NMR (500 MHz, CDCl<sub>3</sub>) δ 5.70–5.60 (m, 1H), 5.60–5.50 (m, 1H), 4.88 (d, *J* = 5.5 Hz, 2H), 4.13 (q, *J* = 7.1 Hz, 2H), 3.61 (s, 2H), 2.60 (t, *J* = 7.7 Hz, 2H), 1.68 (d, *J* = 5.7 Hz, 3H), 1.65–1.59 (m, 2H), 1.36–1.31 (m, 2H), 1.23 (t, *J* = 7.1 Hz, 3H), 0.90 (t, *J* = 7.3 Hz, 3H); <sup>13</sup>C NMR (126 MHz, CDCl<sub>3</sub>) δ 168.41, 146.92, 130.71, 129.37, 124.56, 123.69, 61.72, 50.73, 31.70, 28.93, 24.81, 22.47, 17.72, 14.18, 13.93; HRMS (ESI) calcd for C<sub>14</sub>H<sub>24</sub>N<sub>3</sub>O<sub>2</sub> [M + H]<sup>+</sup> 266.1869, found 266.1872.

**Ethyl 2-(4-butyl-1-(3-methylbut-2-en-1-yl)-1*H*-1,2,3-triazol-5-yl)acetate (5d):** The

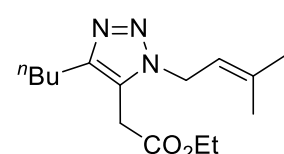

compound **5d** was prepared according to the general procedure and was purified by flash column chromatography (hexane: ethyl acetate = 2:1). **5d** was obtained as a light-yellow oil (26.9 mg, 48% yield). <sup>1</sup>H NMR (500 MHz, CDCl<sub>3</sub>) δ 5.27 (t, *J* = 6.1 Hz, 1H), 4.96 (d, *J* = 6.7 Hz, 2H), 4.15 (t, *J* = 7.0 Hz, 2H), 3.60 (s, 2H), 2.61 (t, *J* = 7.7 Hz, 2H), 1.79 (s, 3H), 1.75 (s, 3H), 1.68–1.61 (m, 2H), 1.38–1.33 (m, 2H), 1.25 (t, *J* = 7.0 Hz, 3H), 0.91 (t, *J* = 7.3 Hz,

3H);  $^{13}\text{C}$  NMR (126 MHz,  $\text{CDCl}_3$ )  $\delta$  168.53, 146.95, 138.05, 125.81, 118.12, 61.76, 47.15, 31.77, 28.91, 25.77, 24.89, 22.54, 18.21, 14.23, 13.99; HRMS (ESI) calcd for  $\text{C}_{15}\text{H}_{26}\text{N}_3\text{O}_2$  [ $\text{M} + \text{H}$ ] $^+$  280.2025, found 280.2020.

**Ethyl 2-(1-(but-2-yn-1-yl)-4-butyl-1H-1,2,3-triazol-5-yl)acetate (5e):** The compound **5e** was

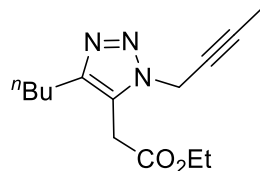

prepared according to the general procedure and was purified by flash column chromatography (hexane: ethyl acetate = 2:1). **5e** was obtained as a yellow oil (40.5 mg, 77% yield).  $^1\text{H}$  NMR (500 MHz,  $\text{CDCl}_3$ )  $\delta$  5.13 (s, 2H), 4.17 (q,  $J = 7.1$  Hz, 2H), 3.80 (s, 2H), 2.62 (t,  $J = 7.6$  Hz,

2H), 1.82 (s, 3H), 1.68–1.62 (m, 2H), 1.37–1.33 (m, 2H), 1.26 (t,  $J = 7.1$  Hz, 3H), 0.92 (t,  $J = 7.3$  Hz, 3H);  $^{13}\text{C}$  NMR (126 MHz,  $\text{CDCl}_3$ )  $\delta$  168.50, 147.16, 126.18, 83.03, 71.27, 61.84, 39.16, 31.71, 28.99, 24.84, 22.50, 14.24, 13.97, 3.67; HRMS (ESI) calcd for  $\text{C}_{14}\text{H}_{22}\text{N}_3\text{O}_2$  [ $\text{M} + \text{H}$ ] $^+$  264.1712, found 264.1712.

**Ethyl 2-(4-butyl-1-(4-methylbenzyl)-1H-1,2,3-triazol-5-yl)acetate (5f):** The compound **5f**

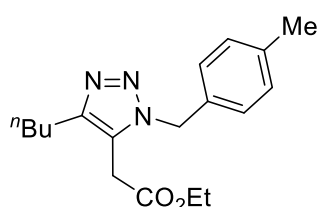

was prepared according to the general procedure and was purified by flash column chromatography (hexane: ethyl acetate = 5:1 to 1:1). **5f** was obtained as a yellow oil (44.7 mg, 71% yield).  $^1\text{H}$  NMR (500 MHz,  $\text{CDCl}_3$ )  $\delta$  7.12 (d,  $J = 7.4$  Hz, 2H), 7.04 (d,  $J = 7.4$  Hz, 2H), 5.52 (s, 2H), 4.05 (q,  $J = 6.9$  Hz, 2H), 3.43 (s, 2H),

2.60 (t,  $J = 7.5$  Hz, 2H), 2.31 (s, 3H), 1.68–1.60 (m, 2H), 1.35–1.31 (m, 2H), 1.19 (t,  $J = 7.0$  Hz, 3H), 0.90 (t,  $J = 7.0$  Hz, 3H);  $^{13}\text{C}$  NMR (126 MHz,  $\text{CDCl}_3$ )  $\delta$  168.33, 147.30, 138.28, 131.85, 129.73, 127.43, 126.17, 61.72, 52.33, 31.69, 28.94, 24.86, 22.49, 21.21, 14.12, 13.95; HRMS (ESI) calcd for  $\text{C}_{18}\text{H}_{26}\text{N}_3\text{O}_2$  [ $\text{M} + \text{H}$ ] $^+$  316.2025, found 316.2024.

**Ethyl 2-(1-(4-bromobenzyl)-4-butyl-1H-1,2,3-triazol-5-yl)acetate (5g):** The compound **5g**

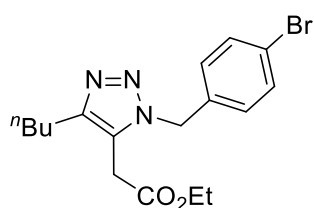

was prepared according to the general procedure and was purified by flash column chromatography (hexane: ethyl acetate = 3:1 to 1:1). **5g** was obtained as a light-yellow oil (50.4 mg, 66% yield).  $^1\text{H}$  NMR (500 MHz,  $\text{CDCl}_3$ )  $\delta$  7.44 (d,  $J = 8.2$  Hz, 2H), 7.02 (d,  $J = 8.1$  Hz, 2H), 5.50 (s, 2H), 4.03 (q,  $J = 7.1$  Hz, 2H), 3.43 (s, 2H),

2.61 (t,  $J = 7.5$  Hz, 2H), 1.69–1.58 (m, 2H), 1.37–1.30 (m, 2H), 1.18 (t,  $J = 7.1$  Hz, 3H), 0.90 (t,  $J = 7.3$  Hz, 3H);  $^{13}\text{C}$  NMR (126 MHz,  $\text{CDCl}_3$ )  $\delta$  168.12, 147.49, 133.87, 132.21, 129.13, 126.24, 122.55, 61.84, 51.76, 31.62, 28.91, 24.82, 22.45, 14.09, 13.91; HRMS (ESI) calcd for  $\text{C}_{17}\text{H}_{23}\text{N}_3\text{O}_2\text{Br}$  [ $\text{M} + \text{H}$ ] $^+$  380.0974, found 380.0963.

**Ethyl 2-(4-butyl-1-(4-nitrobenzyl)-1*H*-1,2,3-triazol-5-yl)acetate (5h):** The compound **5h**

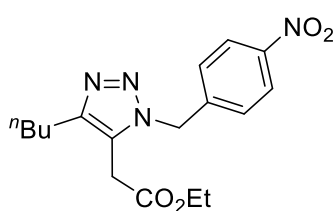

was prepared according to the general procedure and was purified by flash column chromatography (hexane: ethyl acetate = 1:1). **5h** was obtained as a light-yellow oil (45.1 mg, 65% yield). <sup>1</sup>H NMR (500 MHz, CDCl<sub>3</sub>) δ 8.18 (d, *J* = 8.4 Hz, 2H), 7.31 (d, *J* = 8.4 Hz, 2H), 5.66 (s, 2H), 4.05 (q, *J* = 7.1 Hz, 2H),

3.47 (s, 2H), 2.63 (t, *J* = 7.7 Hz, 2H), 1.70–1.62 (m, 2H), 1.39–1.31 (m, 2H), 1.18 (t, *J* = 7.1 Hz, 3H), 0.91 (t, *J* = 7.3 Hz, 3H); <sup>13</sup>C NMR (126 MHz, CDCl<sub>3</sub>) δ 168.04, 148.02, 147.54, 142.08, 128.26, 126.38, 124.27, 61.99, 51.41, 31.61, 31.55, 28.94, 24.83, 22.46, 14.12, 13.92; HRMS (ESI) calcd for C<sub>17</sub>H<sub>23</sub>N<sub>4</sub>O<sub>4</sub>[M + H]<sup>+</sup> 347.1719, found 347.1716.

**Ethyl 2-(4-butyl-1-(3-cyanopropyl)-1*H*-1,2,3-triazol-5-yl)acetate (5i):** The compound **5i**

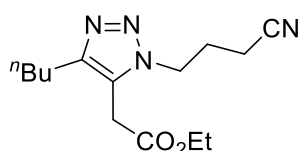

was prepared according to the general procedure and was purified by flash column chromatography (hexane: ethyl acetate = 1:1 to 0:1). **5i** was obtained as a light-yellow oil (36.7 mg, 66% yield).

<sup>1</sup>H NMR (500 MHz, CDCl<sub>3</sub>) δ 4.35 (t, *J* = 6.4 Hz, 2H), 4.17 (q, *J* = 7.1 Hz, 2H), 3.65 (s, 2H), 2.61 (t, *J* = 7.5 Hz, 2H), 2.47 (t, *J* = 6.9 Hz, 2H), 2.38–2.32 (m, 2H), 1.67–1.59 (m, 2H), 1.38–1.31 (m, 2H), 1.26 (t, *J* = 7.1 Hz, 3H), 0.91 (t, *J* = 7.4 Hz, 3H); <sup>13</sup>C NMR (126 MHz, CDCl<sub>3</sub>) δ 168.34, 146.70, 126.46, 118.70, 62.06, 46.25, 31.59, 28.80, 25.39, 24.76, 22.41, 14.82, 14.17, 13.89; HRMS (ESI) calcd for C<sub>14</sub>H<sub>23</sub>N<sub>4</sub>O<sub>2</sub>[M + H]<sup>+</sup> 279.1821, found 279.1824.

**Diethyl 2,2'-(4-butyl-1*H*-1,2,3-triazole-1,5-diyl)diacetate (5j):** The compound **5j** was

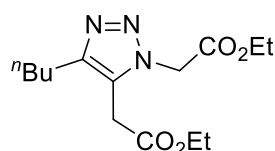

prepared according to the general procedure and was purified by flash column chromatography (hexane: ethyl acetate = 5: 1 to 1:1). **5j** was obtained as a mixture of triazole, light-yellow oil (45.0 mg, 76% yield of **5j**). Characteristic data for **5j**: <sup>1</sup>H NMR (500 MHz, CDCl<sub>3</sub>) δ 5.17

(s, 2H), 4.26–4.18 (m, 2H), 4.12 (q, *J* = 7.1 Hz, 2H), 3.63 (s, 2H), 2.63 (t, *J* = 7.6 Hz, 2H), 1.67–1.59 (m, 2H), 0.89 (t, *J* = 7.2 Hz, 3H); <sup>13</sup>C NMR (126 MHz, CDCl<sub>3</sub>) δ 168.33, 127.10; HRMS (ESI) calcd for C<sub>14</sub>H<sub>24</sub>N<sub>3</sub>O<sub>4</sub> [M + H]<sup>+</sup> 298.1767, found 298.1764.

**Allyl 2-(4-butyl-5-(2-ethoxy-2-oxoethyl)-1*H*-1,2,3-triazol-1-yl)acetate (5k):** The compound

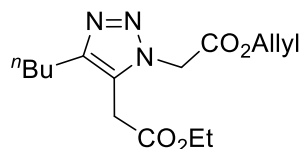

**5k** was prepared according to the general procedure and was purified by flash column chromatography (hexane: ethyl acetate = 3:1 to 1:1). **5k** was obtained as a mixture of triazole, yellow oil (45.2 mg, 73% yield of **5k**). <sup>1</sup>H NMR (500 MHz, CDCl<sub>3</sub>) δ 5.91–

5.83 (m, *J* = 7.4, 5.7, 3.8 Hz, 1H), 5.33–5.25 (m, 2H), 5.23 (s, 2H), 4.65 (d, *J* = 5.4 Hz, 2H), 4.13 (q, *J* = 7.0 Hz, 2H), 3.64 (s, 2H), 2.64 (t, *J* = 7.5 Hz, 2H), 1.69–1.61 (m, 2H), 1.36–1.31

(m, 2H), 1.23 (t,  $J = 7.1$  Hz, 3H), 0.90 (t,  $J = 7.2$  Hz, 3H);  $^{13}\text{C}$  NMR (126 MHz,  $\text{CDCl}_3$ )  $\delta$  168.40, 166.49, 146.86, 131.04, 127.12, 122.03, 119.70, 119.61, 66.74, 61.95, 49.66, 31.65, 29.01, 24.81, 22.38, 14.14, 13.92; HRMS (ESI) calcd for  $\text{C}_{15}\text{H}_{24}\text{N}_3\text{O}_4$   $[\text{M} + \text{H}]^+$  310.1767, found 310.1766.

**Benzyl 2-(4-butyl-5-(2-ethoxy-2-oxoethyl)-1H-1,2,3-triazol-1-yl)acetate (5l):** The

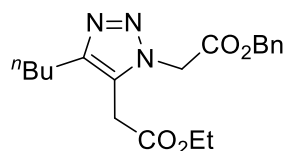

compound **5l** was prepared according to the general procedure and was purified by flash column chromatography (hexane: ethyl acetate = 1:1). **5l** was obtained as a mixture triazole, yellow oil (50.8 mg, 71% yield of **5l**).  $^1\text{H}$  NMR (500 MHz,  $\text{CDCl}_3$ )  $\delta$  7.36–7.33 (m, 3H),

7.32–7.29 (m, 2H), 5.24 (s, 2H), 5.19 (s, 2H), 4.10 (q,  $J = 7.1$  Hz, 2H), 3.61 (s, 2H), 2.64 (t,  $J = 7.6$  Hz, 2H), 1.68–1.61 (m, 2H), 1.38–1.32 (m,  $J = 14.8, 6.8$  Hz, 2H), 1.21 (t,  $J = 7.1$  Hz, 3H), 0.91 (t,  $J = 7.1$  Hz, 3H);  $^{13}\text{C}$  NMR (126 MHz,  $\text{CDCl}_3$ )  $\delta$  168.35, 166.62, 146.83, 134.70, 128.79, 128.50, 127.12, 122.04, 67.92, 61.90, 50.82, 49.70, 31.64, 28.95, 24.78, 22.35, 13.91; HRMS (ESI) calcd for  $\text{C}_{19}\text{H}_{26}\text{N}_3\text{O}_4$   $[\text{M} + \text{H}]^+$  360.1923, found 360.1917.

**Ethyl 2-(4-butyl-1-(2-oxo-2-phenylethyl)-1H-1,2,3-triazol-5-yl)acetate (5m):**

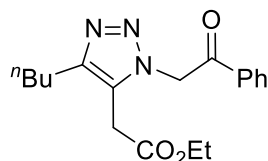

The compound **5m** was prepared according to the general procedure and was purified by flash column chromatography (hexane: ethyl acetate = 1:1). **5m** was obtained as a light-yellow oil (44.1 mg, 67% yield).  $^1\text{H}$  NMR (500 MHz,  $\text{CDCl}_3$ )  $\delta$  8.00 (d,  $J = 7.6$  Hz, 2H), 7.66

(t,  $J = 7.3$  Hz, 1H), 7.53 (t,  $J = 7.6$  Hz, 2H), 5.94 (s, 2H), 4.11 (q,  $J = 7.6$  Hz, 2H), 3.61 (s, 2H), 2.68 (t,  $J = 7.6$  Hz, 2H), 1.74–1.65 (m, 2H), 1.43–1.33 (m, 2H), 1.21 (t,  $J = 7.1$  Hz, 3H), 0.93 (t,  $J = 7.3$  Hz, 3H);  $^{13}\text{C}$  NMR (126 MHz,  $\text{CDCl}_3$ )  $\delta$  191.06, 168.74, 146.87, 134.63, 134.22, 129.25, 128.33, 127.67, 61.90, 54.72, 31.73, 29.19, 24.90, 22.46, 14.13, 13.98; HRMS (ESI) calcd for  $\text{C}_{18}\text{H}_{24}\text{N}_3\text{O}_3$   $[\text{M} + \text{H}]^+$  330.1818, found 330.1817.

**Benzyl 2-(1-benzyl-4-butyl-1H-1,2,3-triazol-5-yl)acetate (6a):** The compound **6a** was

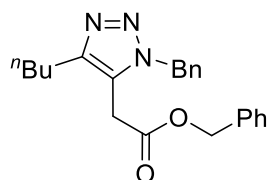

prepared according to the general procedure and was purified by flash column chromatography (hexane: ethyl acetate = 2:1). **6a** was obtained as a light-yellow oil (45.0 mg, 62% yield).  $^1\text{H}$  NMR (500 MHz,  $\text{CDCl}_3$ )  $\delta$  7.38–7.34 (m, 3H), 7.30–7.28 (m, 3H), 7.27–7.24 (m,

2H), 7.11–7.05 (m, 2H), 5.52 (s, 2H), 5.02 (s, 2H), 3.47 (s, 2H), 2.59 (t,  $J = 7.5$  Hz, 2H), 1.65–1.57 (m, 2H), 1.35–1.26 (m, 2H), 0.87 (t,  $J = 7.2$  Hz, 2H);  $^{13}\text{C}$  NMR (126 MHz,  $\text{CDCl}_3$ )  $\delta$  168.10, 147.43, 135.14, 134.78, 129.10, 128.81, 128.53, 128.48, 127.42, 126.05, 67.49, 52.53, 31.66, 28.93, 24.86, 22.50, 13.93; HRMS (ESI) calcd for  $\text{C}_{22}\text{H}_{26}\text{N}_3\text{O}_2$   $[\text{M} + \text{H}]^+$  364.2025, found 364.2019.

**Hexyl 2-(1-benzyl-4-butyl-1*H*-1,2,3-triazol-5-yl)acetate (6b):** The compound **6b** was

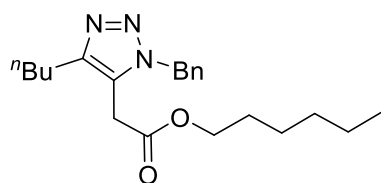

prepared according to the general procedure and was purified by flash column chromatography (hexane: ethyl acetate = 3:1). **6b** was obtained as a light-yellow oil (42.5 mg, 60% yield). <sup>1</sup>H NMR (500 MHz, CDCl<sub>3</sub>) δ 7.34–7.28

(m, 3H), 7.14 (d, *J* = 7.0 Hz, 2H), 5.56 (s, 2H), 3.97 (t, *J* = 6.7 Hz, 2H), 3.44 (s, 2H), 2.61 (t, *J* = 7.6 Hz, 2H), 1.69–1.59 (m, 2H), 1.57–1.49 (m, 2H), 1.35–1.24 (m, 8H), 0.93–0.89 (m, 3H), 0.89–0.86 (m, 3H); <sup>13</sup>C NMR (126 MHz, CDCl<sub>3</sub>) δ 168.36, 147.30, 134.91, 129.09, 128.45, 127.40, 126.25, 65.93, 52.45, 31.69, 31.44, 30.75, 28.95, 28.47, 25.56, 24.88, 22.61, 22.52, 14.08, 13.95; HRMS (ESI) calcd for C<sub>21</sub>H<sub>32</sub>N<sub>3</sub>O<sub>2</sub> [M + H]<sup>+</sup> 358.2495, found 358.2485.

**(1*R*,3*S*,5*r*,7*r*)-Adamantan-2-yl 2-(1-benzyl-4-butyl-1*H*-1,2,3-triazol-5-yl)acetate (6c):** The

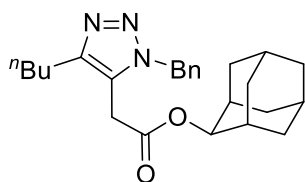

compound **6c** was prepared according to the general procedure and was purified by flash column chromatography (hexane: ethyl acetate = 3:1). **6c** was obtained as a light-yellow oil (45.0 mg, 55% yield). <sup>1</sup>H NMR (500 MHz, CDCl<sub>3</sub>) δ 7.34–7.28 (m, 3H), 7.15 (d,

*J* = 6.8 Hz, 2H), 5.58 (s, 2H), 4.86 (s, 1H), 3.47 (s, 2H), 2.63 (t, *J* = 7.6 Hz, 2H), 1.90–1.87 (m, 2H), 1.85–1.80 (m, *J* = 7.9 Hz, 4H), 1.80–1.72 (m, 6H), 1.68–1.62 (m, 2H), 1.54–1.48 (m, 2H), 1.38–1.32 (m, 2H), 0.91 (t, *J* = 7.3 Hz, 3H); <sup>13</sup>C NMR (126 MHz, CDCl<sub>3</sub>) δ 167.71, 147.22, 134.91, 129.11, 128.46, 127.41, 126.48, 78.89, 52.44, 37.29, 36.33, 31.85, 31.78, 29.39, 27.11, 26.93, 24.93, 13.94; HRMS (ESI) calcd for C<sub>25</sub>H<sub>34</sub>N<sub>3</sub>O<sub>2</sub> [M + H]<sup>+</sup> 408.2651, found 408.2641.

**Allyl 2-(1-benzyl-4-butyl-1*H*-1,2,3-triazol-5-yl)acetate (6d):** The compound **6d** was

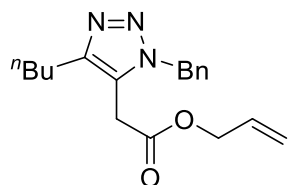

prepared according to the general procedure and was purified by flash column chromatography (hexane: ethyl acetate = 3:1). **6d** was obtained as a light-yellow oil (45.1 mg, 73% yield). <sup>1</sup>H NMR (500

MHz, CDCl<sub>3</sub>) δ 7.37–7.29 (m, *J* = 7.2 Hz, 3H), 7.14 (d, *J* = 6.1 Hz, 2H), 5.85–5.76 (m, 1H), 5.57 (s, 2H), 5.25 (d, *J* = 6.0 Hz, 1H), 5.23 (s, 1H), 4.47 (d, *J* = 5.4 Hz, 2H), 3.47 (s, 2H), 2.62 (t, *J* = 7.6 Hz, 2H), 1.70–1.62 (m, 2H), 1.39–1.30 (m, 2H), 0.91 (t, *J* = 7.3 Hz, 3H); <sup>13</sup>C NMR (126 MHz, CDCl<sub>3</sub>) δ 167.96, 147.45, 134.87, 131.40, 129.27, 129.13, 128.50, 127.44, 126.07, 119.33, 66.32, 52.53, 31.69, 28.88, 24.90, 22.53, 13.97; HRMS (ESI) calcd for C<sub>18</sub>H<sub>24</sub>N<sub>3</sub>O<sub>2</sub> [M + H]<sup>+</sup> 314.1868, found 314.1864.

**1-Benzyl-5-butyl-1,4,5,7-tetrahydro-6*H*-[1,2,3]triazolo[4,5-*c*]pyridin-6-one (8a):** The

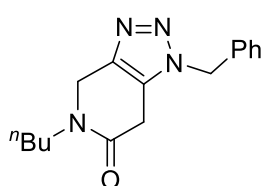

compound **8a** was prepared according to the general procedure and was purified by flash column chromatography (hexane: ethyl acetate = 1:1). **8a** was obtained as a light-yellow oil (43.2 mg, 76% yield). <sup>1</sup>H NMR (500 MHz, CDCl<sub>3</sub>) δ 7.34 (m, 3H), 7.22 (m, 2H), 5.46 (s, 2H),

4.57 (t,  $J = 2.7$  Hz, 2H), 3.47 (m, 2H), 3.37 (t,  $J = 2.6$  Hz, 2H), 1.57 (m, 2H), 1.33 (m, 2H), 0.92 (t,  $J = 7.3$  Hz, 2H);  $^{13}\text{C}$  NMR (125 MHz,  $\text{CDCl}_3$ )  $\delta$  163.9, 137.3, 133.7, 129.2, 128.9, 127.8, 110.2, 52.6, 48.0, 45.4, 28.9, 28.3, 20.1, 13.8; HRMS (ESI) calcd for  $\text{C}_{16}\text{H}_{21}\text{N}_4\text{O}$  [ $\text{M} + \text{H}$ ] $^+$  285.1710, found 285.1711.

**5-Butyl-1-octyl-1,4,5,7-tetrahydro-6H-[1,2,3]triazolo[4,5-c]pyridin-6-one (8b):** The

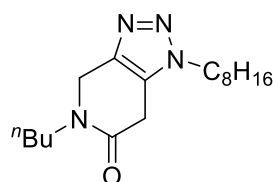

compound **8b** was prepared according to the general procedure and was purified by flash column chromatography (hexane: ethyl acetate = 1:1). **8b** was obtained as a light-yellow oil (44.1 mg, 72% yield).  $^1\text{H}$  NMR (500 MHz,  $\text{CDCl}_3$ )  $\delta$  4.60 (s, 2H), 4.22 (t,  $J = 7.1$  Hz, 2H), 3.61 (s, 2H), 3.53 (m, 2H), 1.86 (m, 2H), 1.61 (m, 2H), 1.31 (m, 12H), 0.94 (t,  $J = 7.3$  Hz, 3H), 0.86 (t,  $J = 6.6$  Hz, 3H);  $^{13}\text{C}$  NMR (125 MHz,  $\text{CDCl}_3$ )  $\delta$  164.0, 136.6, 127.5, 48.4, 48.0, 45.4, 31.6, 29.8, 29.0, 28.9, 28.3, 26.5, 22.5, 20.1, 14.0, 13.8; HRMS (ESI) calcd for  $\text{C}_{17}\text{H}_{31}\text{N}_4\text{O}$  [ $\text{M} + \text{H}$ ] $^+$  307.2492, found 307.2501.

**Ethyl 2-(5-butyl-6-oxo-4,5,6,7-tetrahydro-1H-[1,2,3]triazolo[4,5-c]pyridin-1-yl)acetate (8c):** The compound **8c** was prepared according to the general

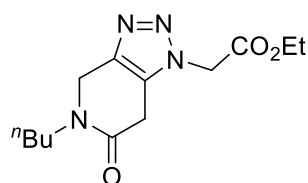

procedure and was purified by flash column chromatography (hexane: ethyl acetate = 1:1). **8c** was obtained as a light-yellow oil (40.1 mg, 73% yield).  $^1\text{H}$  NMR (500 MHz,  $\text{CDCl}_3$ )  $\delta$  5.06 (s, 2H),

4.61 (s, 2H), 4.26 (q,  $J = 7.0$  Hz, 2H), 3.59 (s, 2H), 3.52 (m, 2H), 1.61 (m, 2H), 1.36 (td,  $J = 14.9, 7.4$  Hz, 2H), 1.30 (t,  $J = 7.1$  Hz, 3H), 0.94 (t,  $J = 7.3$  Hz, 3H);  $^{13}\text{C}$  NMR (125 MHz,  $\text{CDCl}_3$ )  $\delta$  165.8, 163.8, 137.2, 129.1, 62.6, 49.1, 48.0, 45.3, 28.9, 28.1, 20.1, 14.1, 13.8; HRMS (ESI) calcd for  $\text{C}_{13}\text{H}_{21}\text{N}_4\text{O}_3$  [ $\text{M} + \text{H}$ ] $^+$  281.1608, found 281.1609.

**5-Allyl-1-benzyl-1,4,5,7-tetrahydro-6H-[1,2,3]triazolo[4,5-c]pyridin-6-one (8d):** The

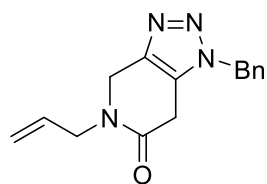

compound **8d** was prepared according to the general procedure and was purified by flash column chromatography (hexane: ethyl acetate = 1:1). **8d** was obtained as a light-yellow oil (41.9 mg, 78% yield).  $^1\text{H}$  NMR (500 MHz,  $\text{CDCl}_3$ )  $\delta$  7.35 (m, 3H), 7.22 (m, 2H), 5.77 (tdd,  $J =$

16.6, 10.8, 6.1 Hz, 1H), 5.48 (s, 2H), 5.22 (m, 2H), 4.55 (t,  $J = 2.8$  Hz, 2H), 4.12 (d,  $J = 6.1$  Hz, 2H), 3.40 (t,  $J = 2.8$  Hz, 2H);  $^{13}\text{C}$  NMR (125 MHz,  $\text{CDCl}_3$ )  $\delta$  163.9, 137.3, 133.6, 131.6, 129.3, 128.9, 127.8, 127.7, 118.6, 52.6, 50.3, 44.8, 28.3; HRMS (ESI) calcd for  $\text{C}_{15}\text{H}_{17}\text{N}_4\text{O}$  [ $\text{M} + \text{H}$ ] $^+$  269.1397, found 269.1400.



**5-Allyl-1-octyl-1,4,5,7-tetrahydro-6H-[1,2,3]triazolo[4,5-c]pyridin-6-one (8e):** The

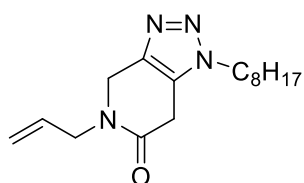

compound **8e** was prepared according to the general procedure and was purified by flash column chromatography (hexane: ethyl acetate = 1:1). **8e** was obtained as a light-yellow oil (42.9 mg, 74% yield). <sup>1</sup>H NMR (500 MHz, CDCl<sub>3</sub>) δ 5.85–5.73 (m, 1H), 5.23 (m, 2H), 4.56 (s, 2H), 4.22 (t, *J* = 7.1 Hz, 2H), 4.15 (d, *J* = 6.0 Hz, 2H), 3.63 (s, 2H), 1.85 (m, 2H), 1.26 (m, 10H), 0.85 (t, *J* = 6.7 Hz, 3H); <sup>13</sup>C NMR (125 MHz, CDCl<sub>3</sub>) δ 164.0, 136.6, 131.6, 127.3, 118.6, 50.3, 48.4, 44.9, 31.7, 29.8, 29.0, 28.9, 28.3, 26.5, 22.5, 14.0; HRMS (ESI) calcd for C<sub>16</sub>H<sub>27</sub>N<sub>4</sub>O [M + H]<sup>+</sup> 291.2179, found 291.2188.

**1-Benzyl-5-(4-methoxybenzyl)-1,4,5,7-tetrahydro-6H-[1,2,3]triazolo[4,5-c]pyridin-6-one (8f):** The compound **8f** was prepared according to the

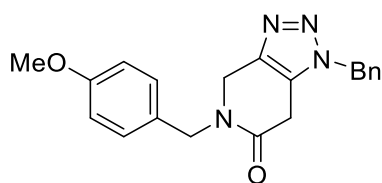

general procedure and was purified by flash column chromatography (hexane: ethyl acetate = 1:1). **8f** was obtained as a light-yellow oil (53.6 mg, 77% yield). <sup>1</sup>H NMR (500 MHz, CDCl<sub>3</sub>) δ 7.35 (m, 3H), 7.23 (m, 4H), 6.84 (d, *J* = 7.3 Hz, 2H), 5.46 (s, 2H), 4.64 (s, 2H), 4.49 (s, 2H), 3.77 (s, 3H), 3.43 (s, 2H); <sup>13</sup>C NMR (125 MHz, CDCl<sub>3</sub>) δ 164.1, 159.3, 137.2, 133.6, 130.1, 129.8, 129.2, 129.1, 129.1, 128.9, 128.9, 128.1, 128.0, 127.8, 127.6, 114.1, 55.3, 52.6, 50.5, 44.6, 28.4; HRMS (ESI) calcd for C<sub>20</sub>H<sub>21</sub>N<sub>4</sub>O<sub>2</sub> [M + H]<sup>+</sup> 349.1659, found 349.1662.

**5-(4-Methoxybenzyl)-1-octyl-1,4,5,7-tetrahydro-6H-[1,2,3]triazolo[4,5-c]pyridin-6-one (8g):** The compound **8g** was prepared according to the

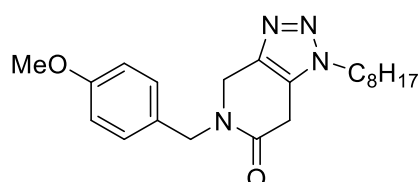

general procedure and was purified by flash column chromatography (hexane: ethyl acetate = 1:1). **8g** was obtained as a light-yellow oil (57.8 mg, 78% yield). <sup>1</sup>H NMR (500 MHz, CDCl<sub>3</sub>) δ 7.26 (d, *J* = 8.4 Hz, 2H), 6.86 (d, *J* = 8.4 Hz, 2H), 4.69 (s, 2H), 4.51 (s, 2H), 4.22 (t, *J* = 7.2 Hz, 2H), 3.79 (s, 3H), 3.67 (s, 2H), 1.85 (m, 2H), 1.33–1.21 (m, 10H), 0.87 (t, *J* = 6.8 Hz, 3H); <sup>13</sup>C NMR (125 MHz, CDCl<sub>3</sub>) δ 164.2, 159.3, 136.6, 129.9, 128.1, 127.2, 114.1, 55.3, 50.5, 48.4, 44.7, 31.7, 29.8, 29.0, 28.9, 28.4, 26.5, 22.6, 14.0; HRMS (ESI) calcd for C<sub>21</sub>H<sub>31</sub>N<sub>4</sub>O<sub>2</sub> [M + H]<sup>+</sup> 371.2442, found 371.2444.

**5-(4-Methoxybenzyl)-1-((trimethylsilyl)methyl)-1,4,5,7-tetrahydro-6H-**

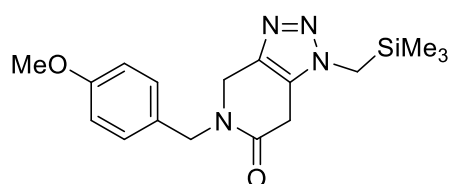

**[1,2,3]triazolo[4,5-c]pyridin-6-one (8h):** The compound **8h** was prepared according to the general procedure and was purified by flash column chromatography (hexane: ethyl acetate = 1:1). **8h** was obtained as a light-yellow oil (55.1 mg, 80% yield). <sup>1</sup>H NMR (500 MHz, CDCl<sub>3</sub>) δ 7.26 (d, *J* =

8.5 Hz, 2H), 6.86 (d,  $J = 8.5$  Hz, 2H), 4.69 (s, 2H), 4.51 (t,  $J = 2.7$  Hz, 2H), 3.79 (s, 3H), 3.62 (m, 4H), 0.17 (s, 9H);  $^{13}\text{C}$  NMR (125 MHz,  $\text{CDCl}_3$ )  $\delta$  164.5, 159.3, 136.1, 129.9, 128.2, 127.6, 114.1, 55.3, 50.5, 44.9, 39.3, 28.5, -2.0; HRMS (ESI) calcd for  $\text{C}_{17}\text{H}_{25}\text{N}_4\text{O}_2$  Si  $[\text{M} + \text{H}]^+$  345.1741, found 345.1746.

**Ethyl 2-(5-(4-methoxybenzyl)-6-oxo-4,5,6,7-tetrahydro-1H-[1,2,3]triazolo[4,5-c]pyridin-**

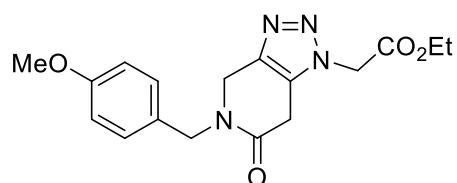

**1-yl)acetate (8i):** The compound **8i** was prepared according to the general procedure and was purified by flash column chromatography (hexane: ethyl acetate = 1:1). **8i** was obtained as a light-yellow oil (52.5 mg, 76%

yield).  $^1\text{H}$  NMR (500 MHz,  $\text{CDCl}_3$ )  $\delta$  7.25 (d,  $J = 8.6$  Hz, 2H), 6.86 (d,  $J = 8.4$  Hz, 2H), 5.06 (s, 2H), 4.69 (s, 2H), 4.52 (s, 2H), 4.26 (q,  $J = 7.1$  Hz, 2H), 3.78 (s, 3H), 3.67 (s, 2H), 1.30 (t,  $J = 7.1$  Hz, 3H);  $^{13}\text{C}$  NMR (125 MHz,  $\text{CDCl}_3$ )  $\delta$  165.8, 164.0, 159.3, 137.1, 129.8, 128.8, 128.1, 114.2, 62.6, 55.3, 50.5, 49.1, 44.6, 28.2, 14.1; HRMS (ESI) calcd for  $\text{C}_{17}\text{H}_{21}\text{N}_4\text{O}_4$   $[\text{M} + \text{H}]^+$  345.1557, found 345.1558.

**1-Benzyl-5-(4-bromophenyl)-1,4,5,7-tetrahydro-6H-[1,2,3]triazolo[4,5-c]pyridin-6-one**

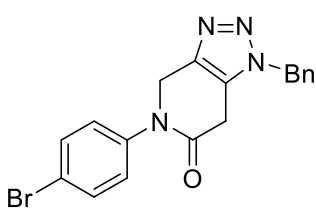

**(8j):** The compound **8j** was prepared according to the general procedure and was purified by flash column chromatography (hexane: ethyl acetate = 1:1). **8j** was obtained as a light-yellow oil (39.7 mg, 52% yield).  $^1\text{H}$  NMR (500 MHz,  $\text{CDCl}_3$ )  $\delta$  7.58 (d,  $J = 8.2$  Hz, 2H), 7.39 (d,  $J = 6.6$  Hz, 2H), 7.27 (d,  $J = 6.6$  Hz, 2H), 7.15 (d,  $J = 8.2$  Hz, 2H), 5.53 (s, 2H), 4.89 (s, 2H), 3.56 (s, 2H);  $^{13}\text{C}$  NMR (125 MHz,  $\text{CDCl}_3$ )  $\delta$  164.7, 141.2, 137.2, 133.5, 132.9, 129.3, 129.1, 129.0, 128.4, 127.8, 127.6, 121.6, 52.7, 49.1, 28.8; HRMS (ESI) calcd for  $\text{C}_{18}\text{H}_{16}\text{BrN}_4\text{O}$   $[\text{M} + \text{H}]^+$  383.0502, found 383.0512.

**7-Acetyl-4,4-dimethyl-1-(4-nitrobenzyl)-4,7-dihydropyrano[3,4-d][1,2,3]triazol-6(1H)-**

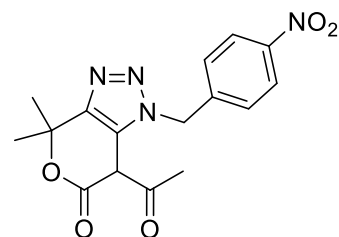

**one (8k):** The compound **8k** was prepared according to the general procedure and was purified by flash column chromatography (hexane: ethyl acetate = 1:1 to 1:3). **8k** was obtained as a light-yellow oil (18.6 mg, 27% yield).  $^1\text{H}$  NMR (500 MHz,  $\text{CDCl}_3$ )  $\delta$  8.17 (d,  $J = 8.6$  Hz, 2H), 7.50 (d,  $J = 8.6$  Hz, 2H), 5.91 (s, 1H), 4.99 (s, 2H), 2.40 (s, 3H), 2.08 (s, 3H), 1.89 (s, 3H);  $^{13}\text{C}$  NMR (126 MHz,  $\text{CDCl}_3$ )  $\delta$  167.89, 164.40, 159.49, 147.52, 144.65, 128.60, 124.05, 117.33, 48.49, 28.15, 27.66, 20.93; HRMS (ESI) calcd for  $\text{C}_{16}\text{H}_{17}\text{N}_2\text{O}_5$   $[\text{M} - \text{N}_2 + \text{H}]^+$  317.1137, found 317.1135.

***N*-((1-Benzyl-1*H*-1,2,3-triazol-4-yl)methyl)-*N*-butyl-2-diazo-3-oxobutanamide (**8I'**):** The

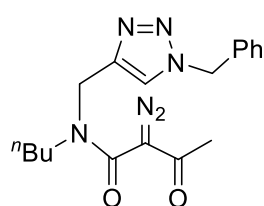

compound **8I'** was prepared according to the general procedure with 30 mol % of dtbpy as additive and was purified by flash column chromatography (hexane: ethyl acetate = 2:1 to 1:1). **8I'** was obtained as a light-yellow oil (34.0 mg, 48%). <sup>1</sup>H NMR (500 MHz, CDCl<sub>3</sub>) δ 7.57 (s, 1H), 7.36–7.31 (m, 3H), 7.24 (d, *J* = 6.1 Hz, 2H), 5.49 (s, 2H),

4.57 (s, 2H), 3.29 (t, *J* = 7.5 Hz, 2H), 2.27 (s, 3H), 1.60–1.52 (m, 2H), 1.29–1.20 (m, 2H), 0.87 (t, *J* = 7.2 Hz, 3H); <sup>13</sup>C NMR (126 MHz, CDCl<sub>3</sub>) δ 161.22, 144.14, 134.65, 129.20, 128.86, 128.08, 123.29, 54.30, 48.45, 42.42, 29.84, 27.29, 20.03, 13.75; HRMS (ESI) calcd for C<sub>18</sub>H<sub>23</sub>N<sub>6</sub>O<sub>2</sub> [M + H]<sup>+</sup> 355.1882, found 355.1874.

**5-Butyl-3-methyl-5,6-dihydro-4*H*-furo[3,4-*c*]pyrrol-4-one (**8I''**):** The compound **8I''** was

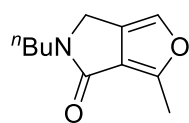

prepared according to the general procedure and was purified by flash column chromatography (hexane: ethyl acetate = 2:1). **8I''** was obtained as a light-yellow oil (20.0 mg, 52%). <sup>1</sup>H NMR (500 MHz, CDCl<sub>3</sub>) δ 7.10 (s, 1H),

4.21 (s, 2H), 3.45 (t, *J* = 7.3 Hz, 2H), 2.47 (s, 3H), 1.61–1.52 (m, 2H), 1.39–1.30 (m, 2H), 0.94 (t, *J* = 7.3 Hz, 3H); <sup>13</sup>C NMR (126 MHz, CDCl<sub>3</sub>) δ 164.03, 148.04, 131.18, 129.79, 126.60, 125.52, 44.30, 42.51, 30.30, 20.15, 13.90, 12.83; HRMS (ESI) calcd for C<sub>11</sub>H<sub>16</sub>NO<sub>2</sub> [M + H]<sup>+</sup> 194.1181, found 194.1182.

## VI. <sup>1</sup>H NMR and <sup>13</sup>C NMR Spectra

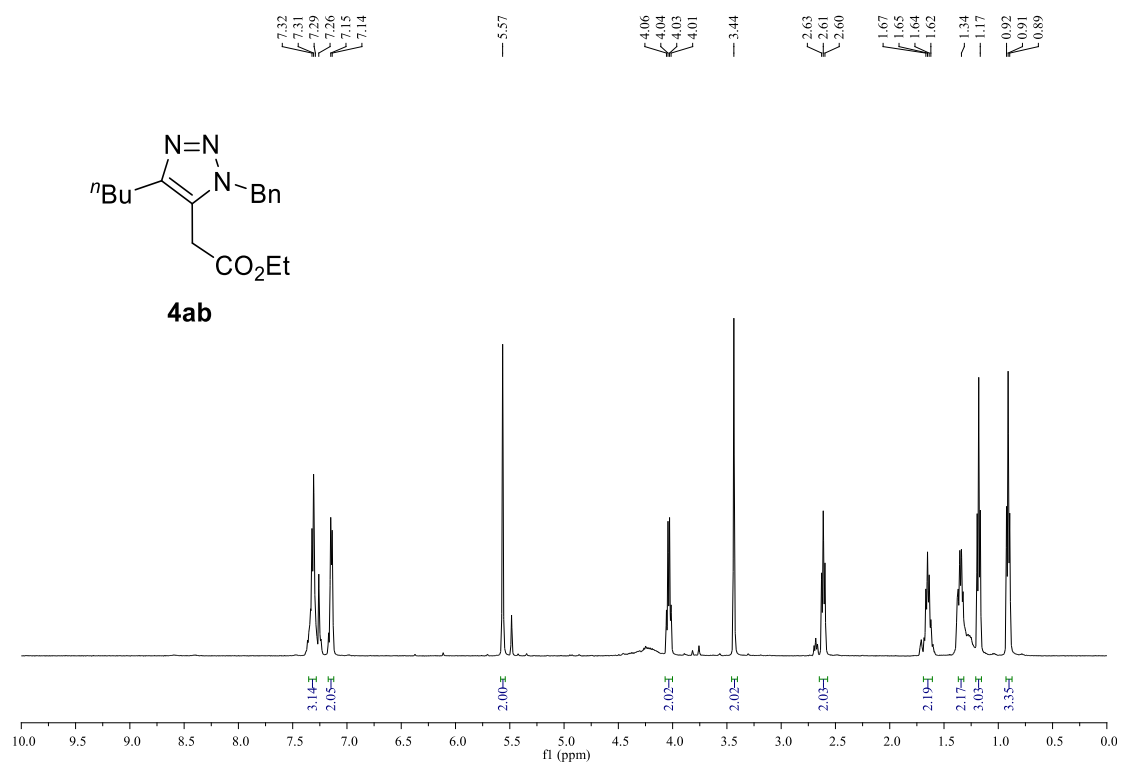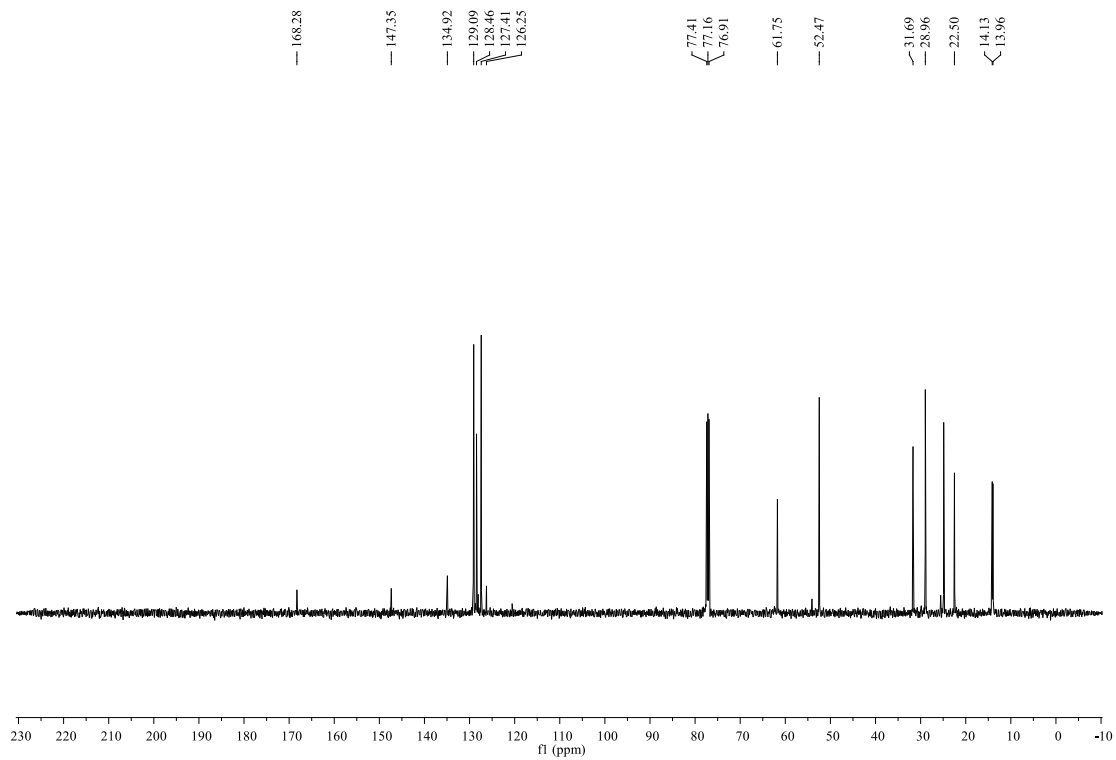

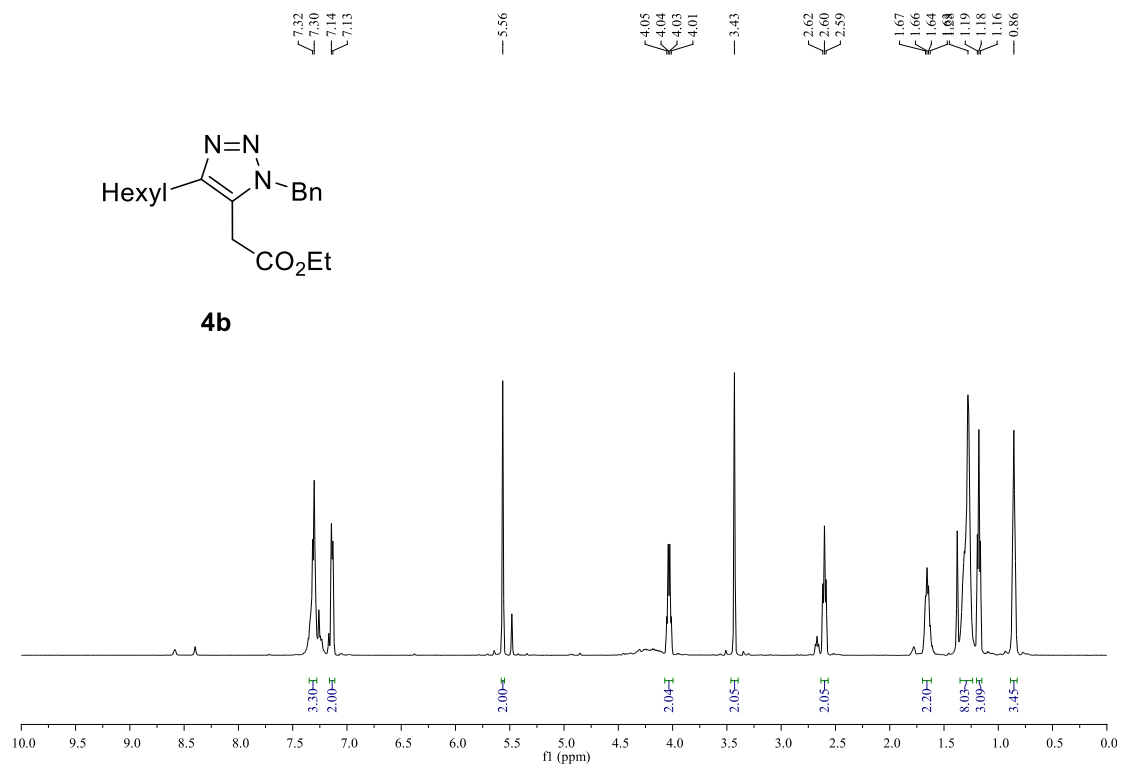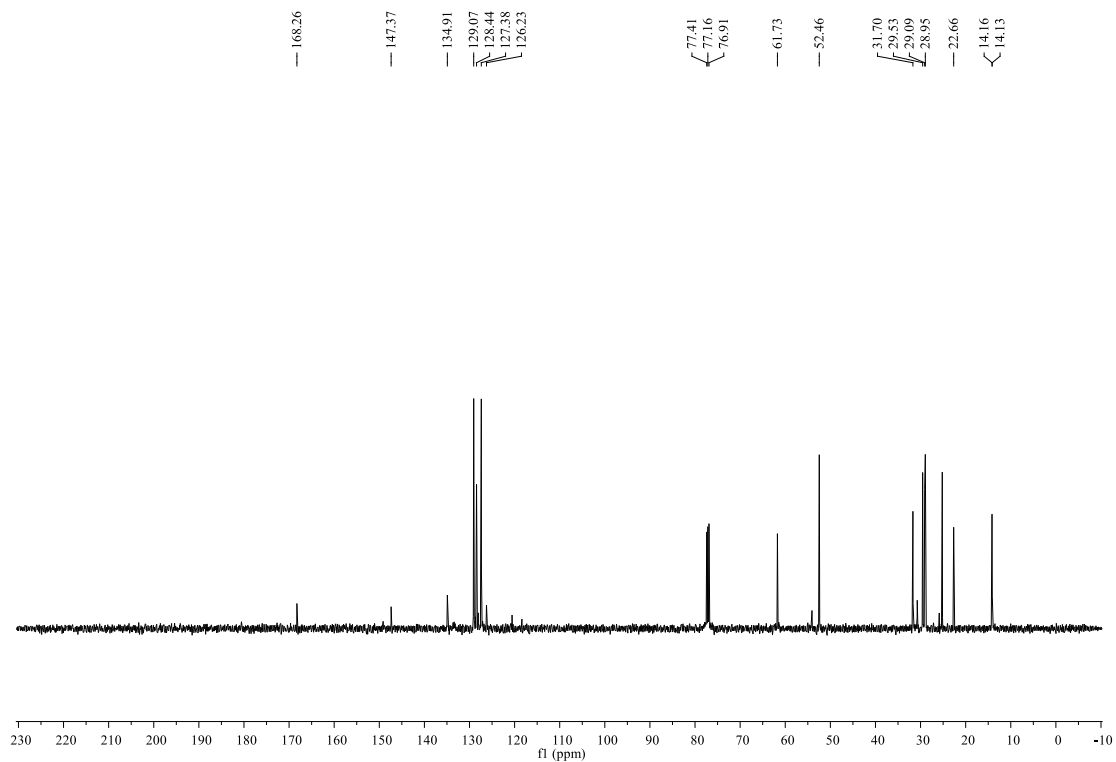

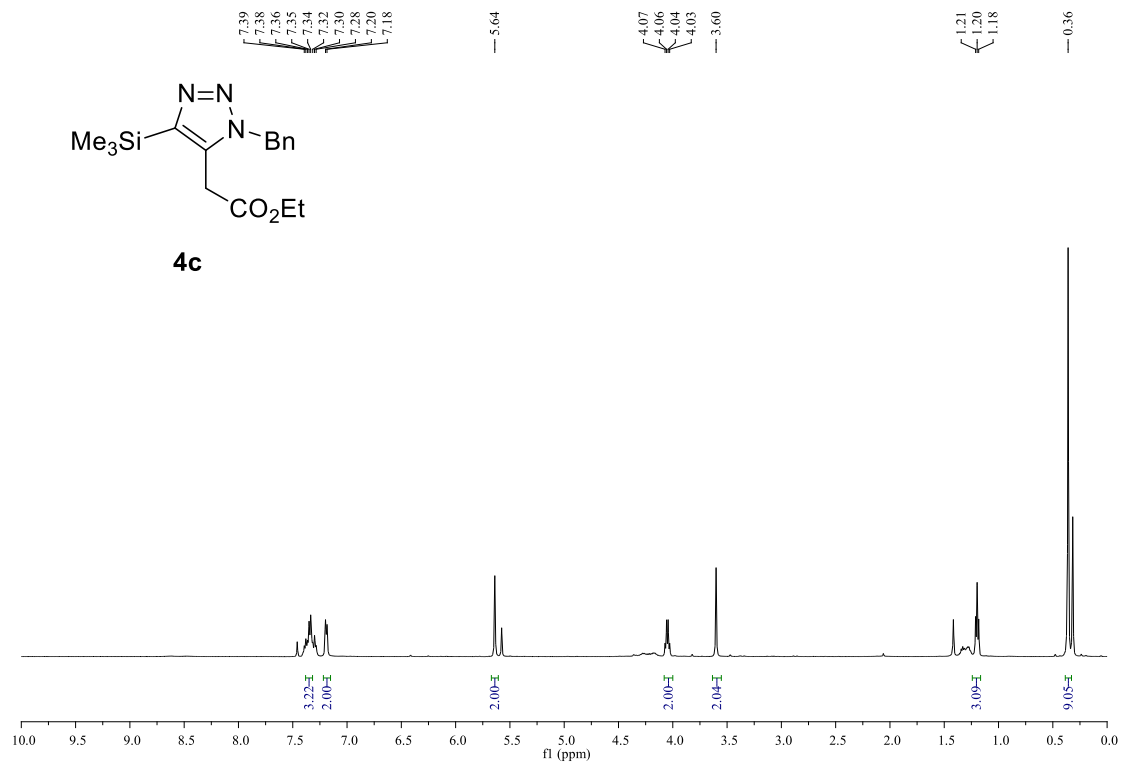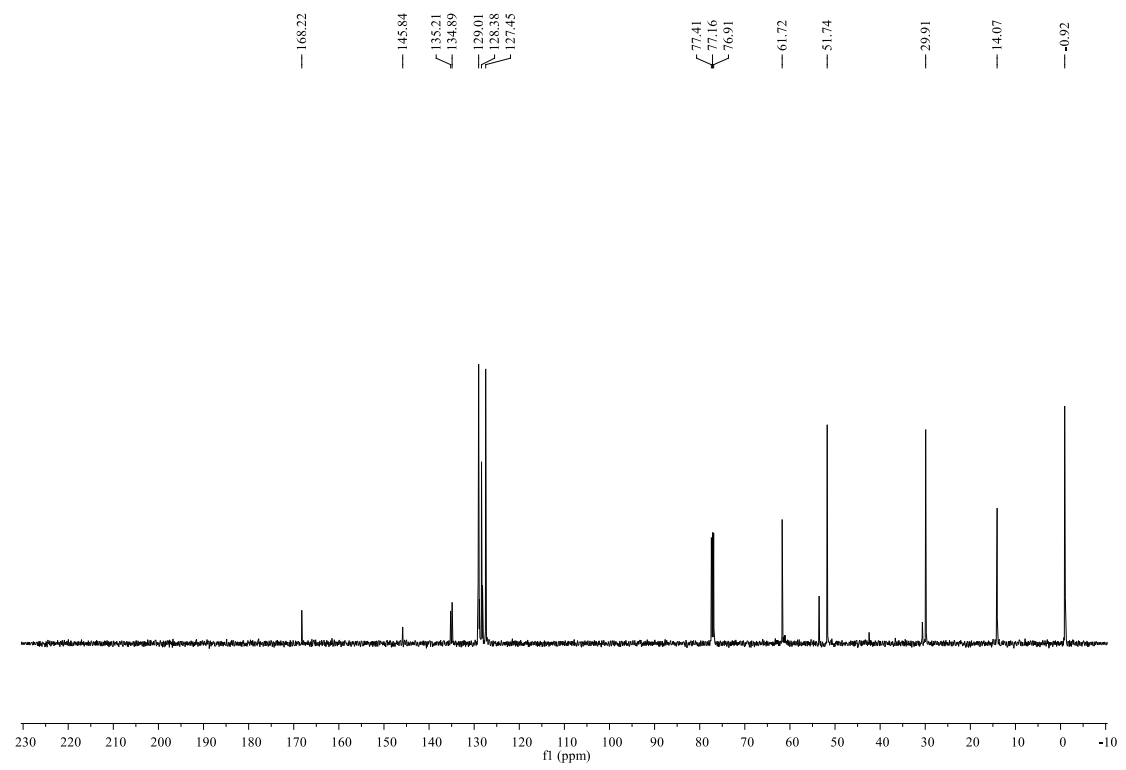

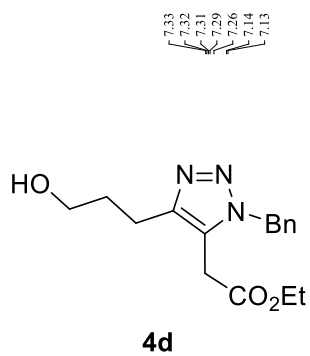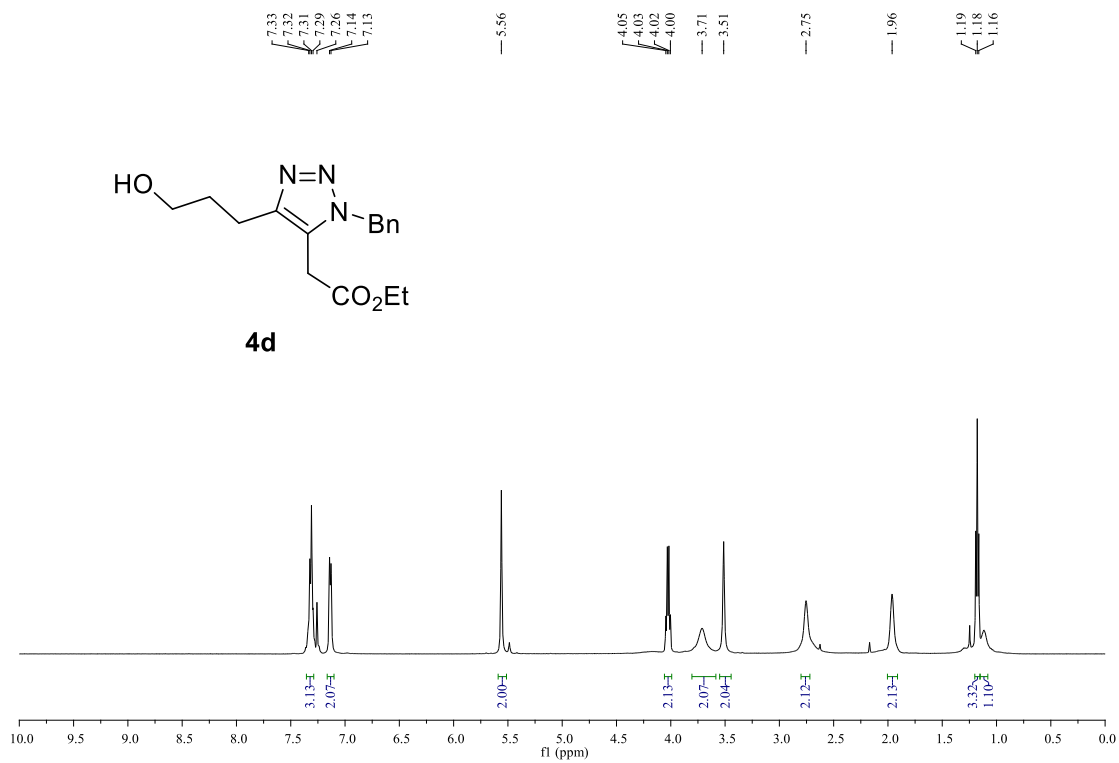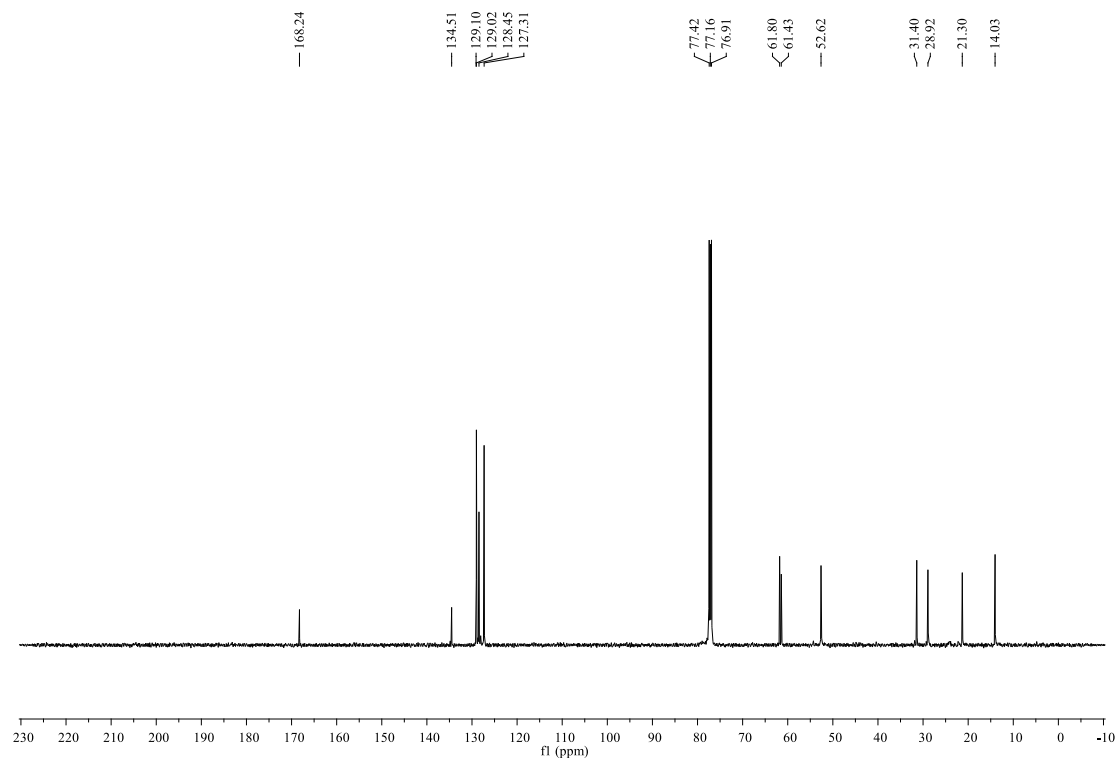

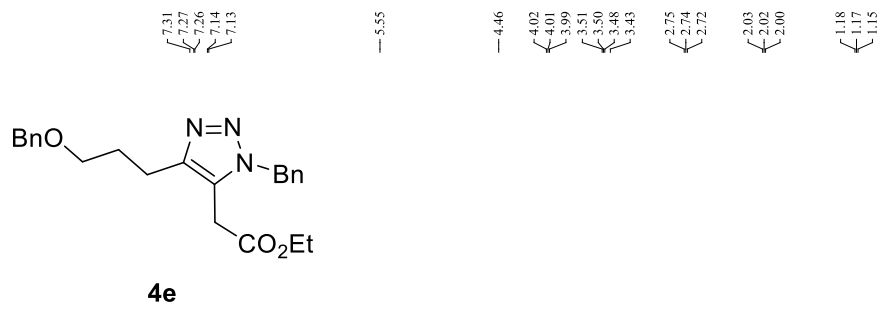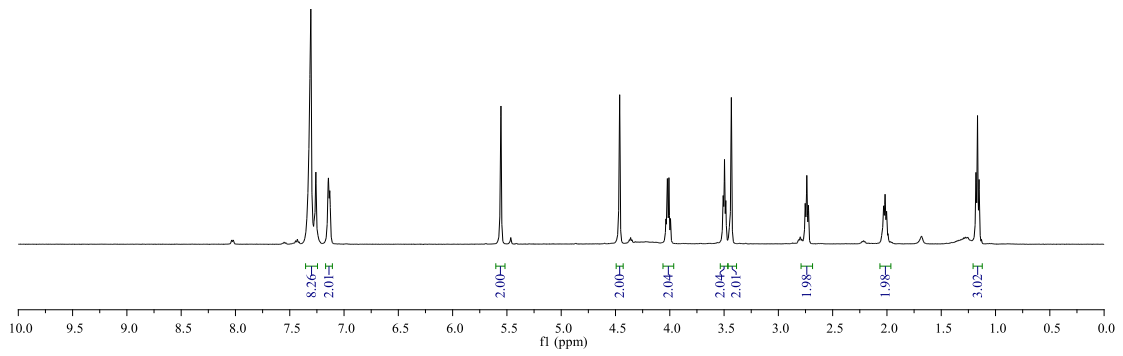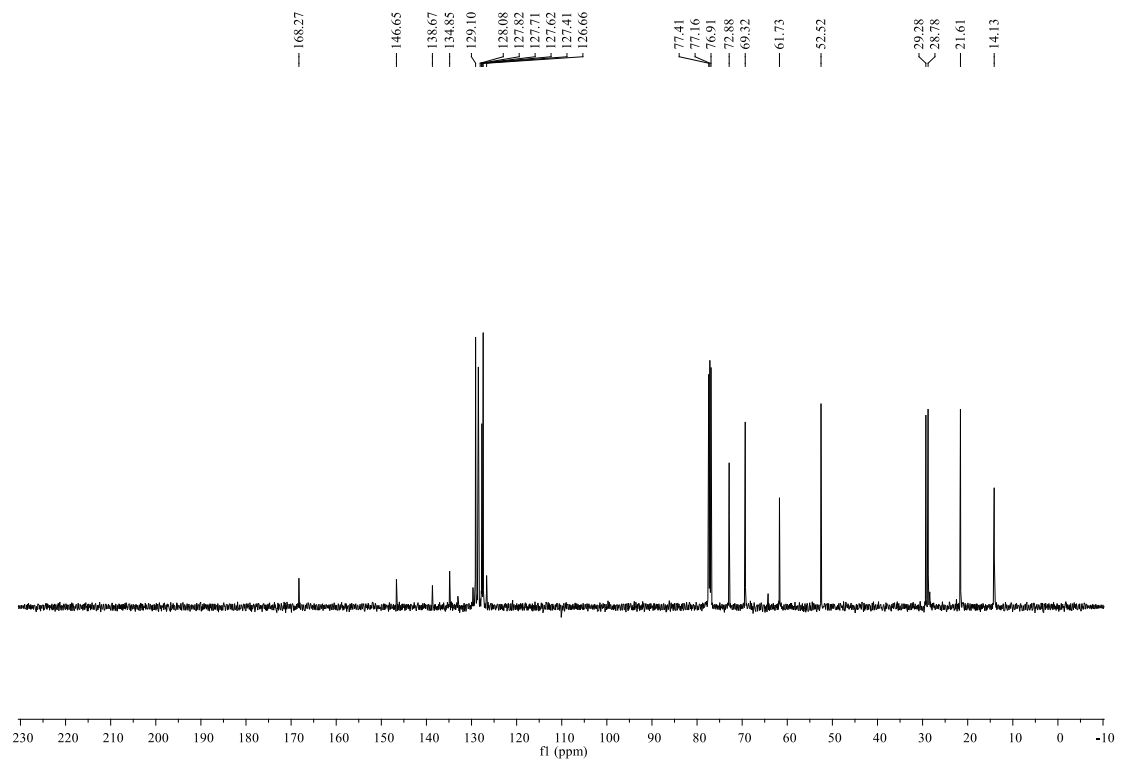



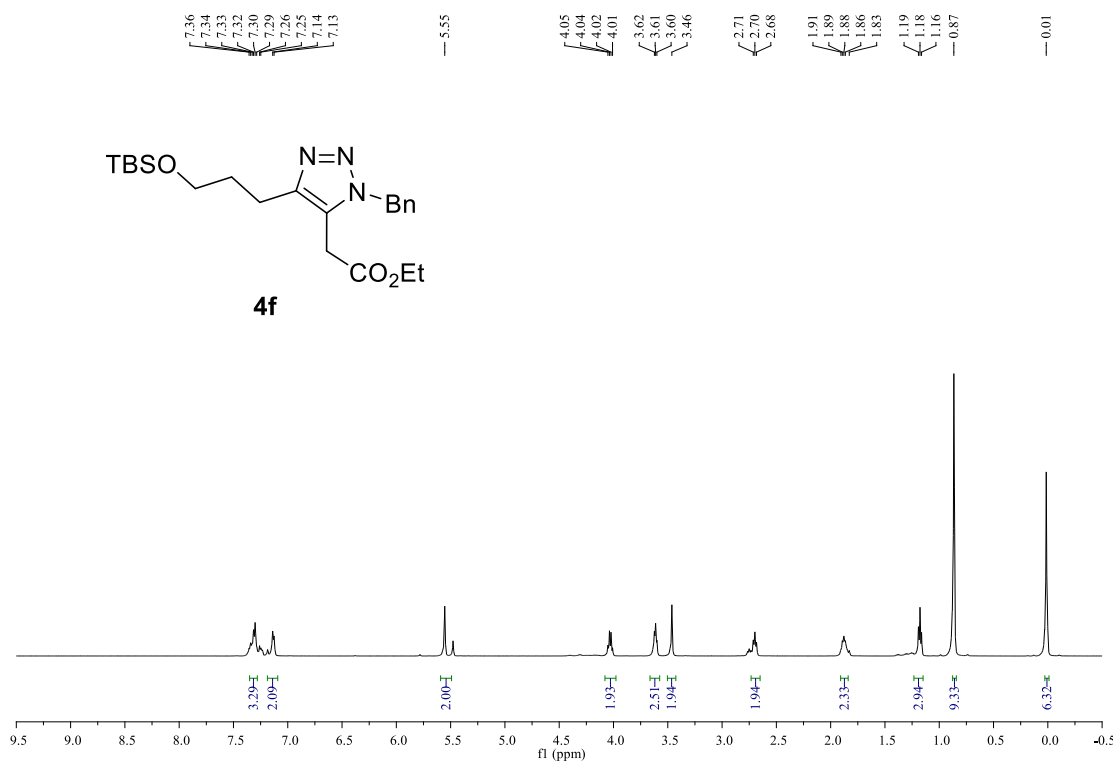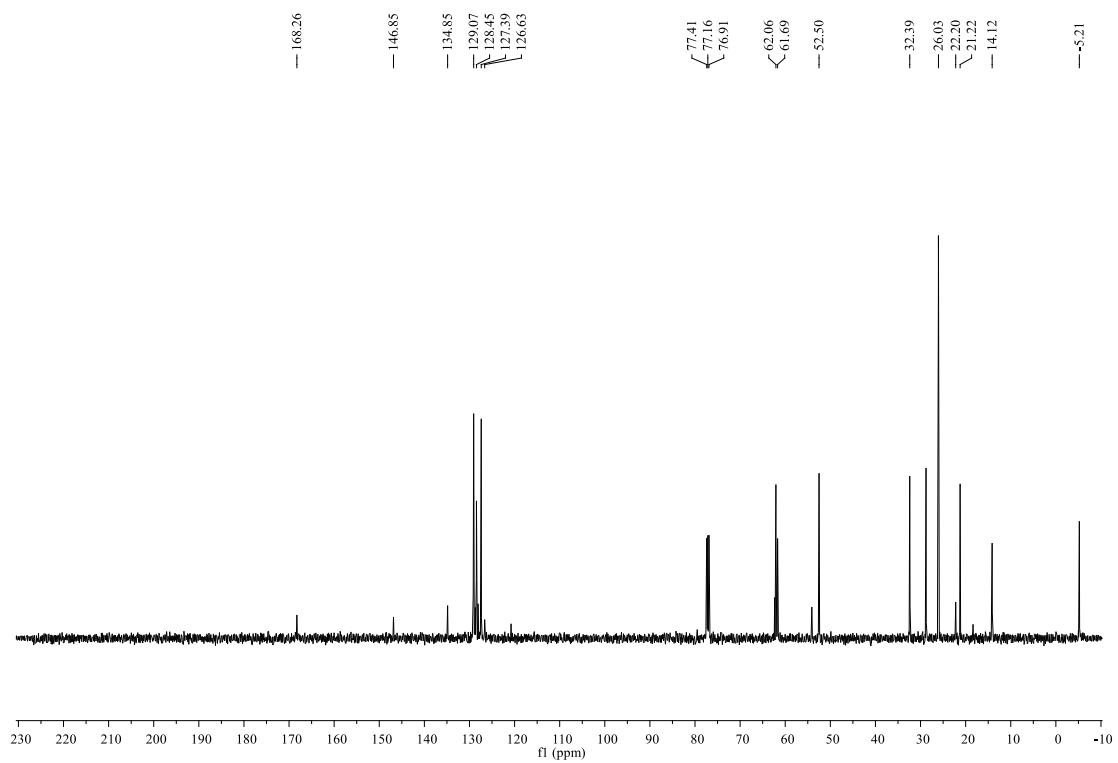

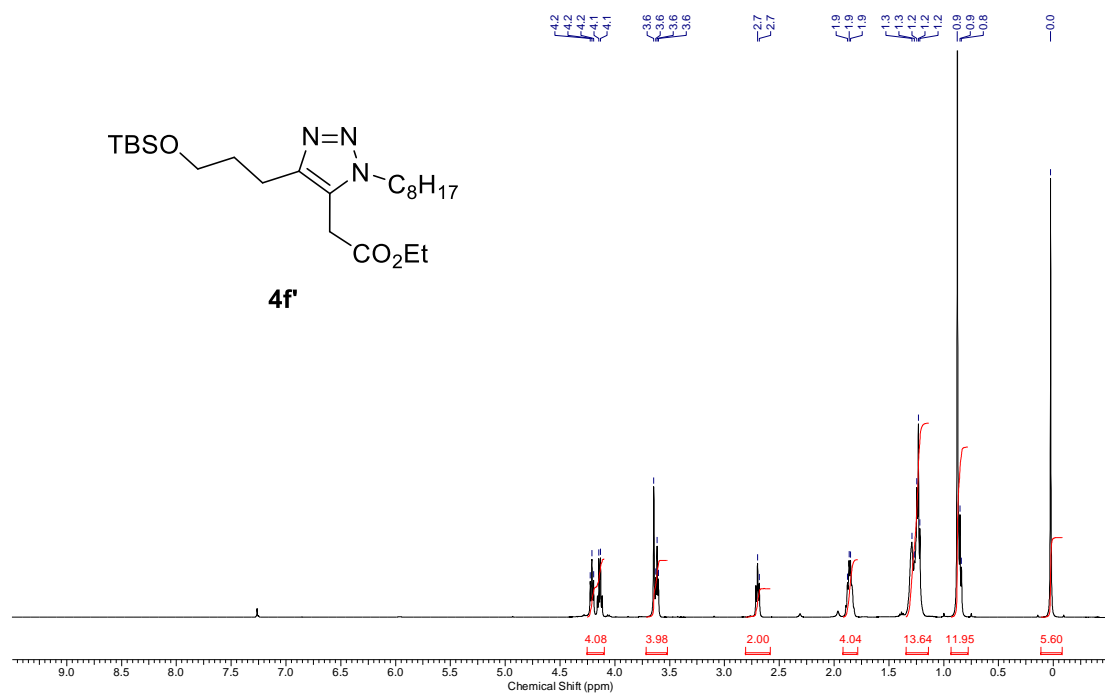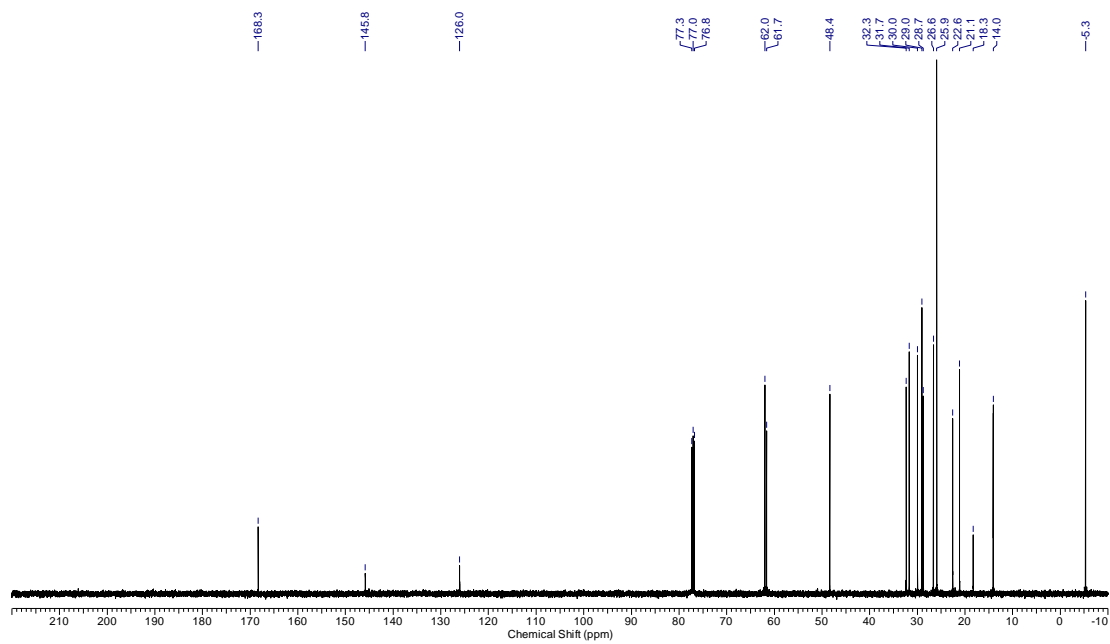

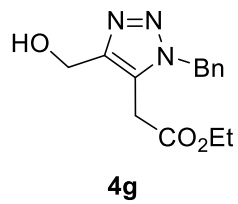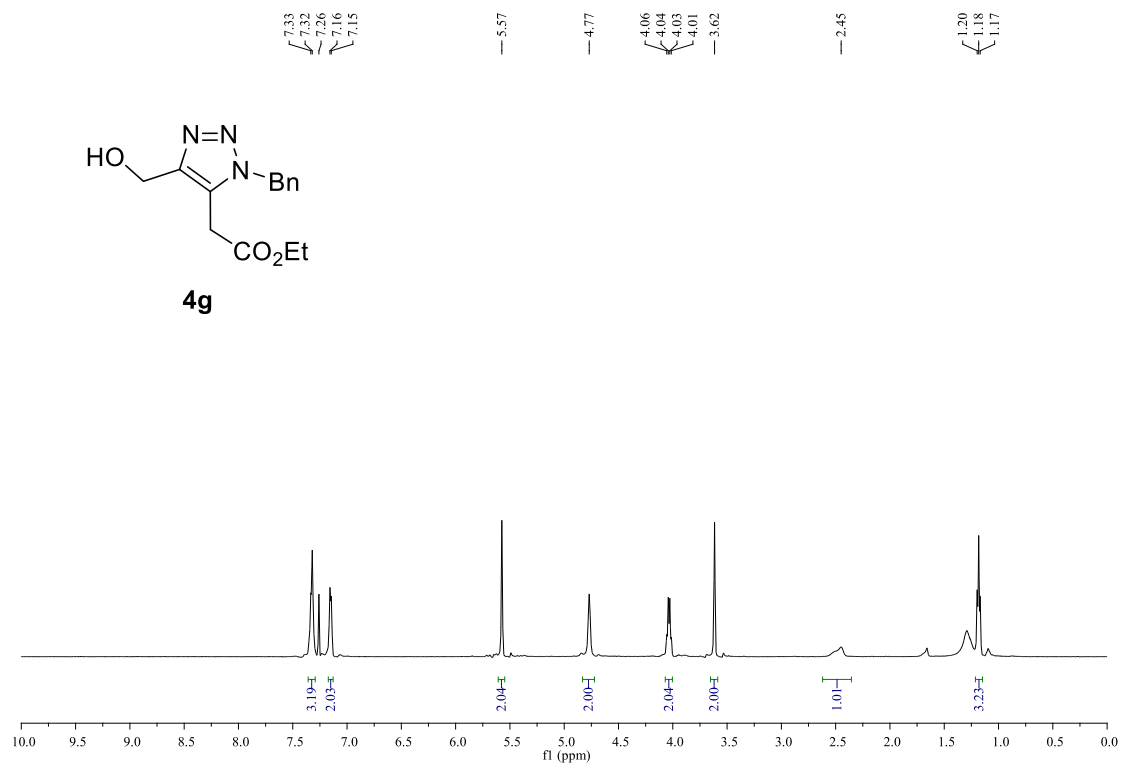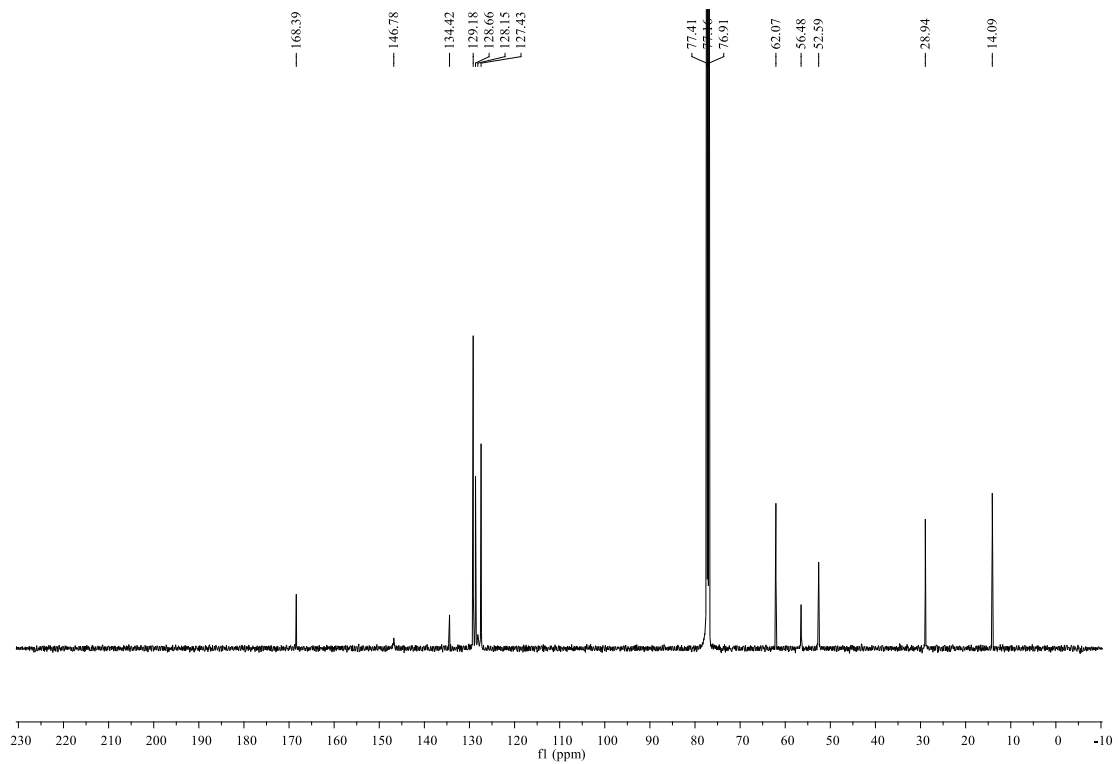

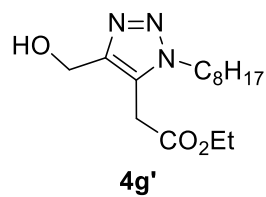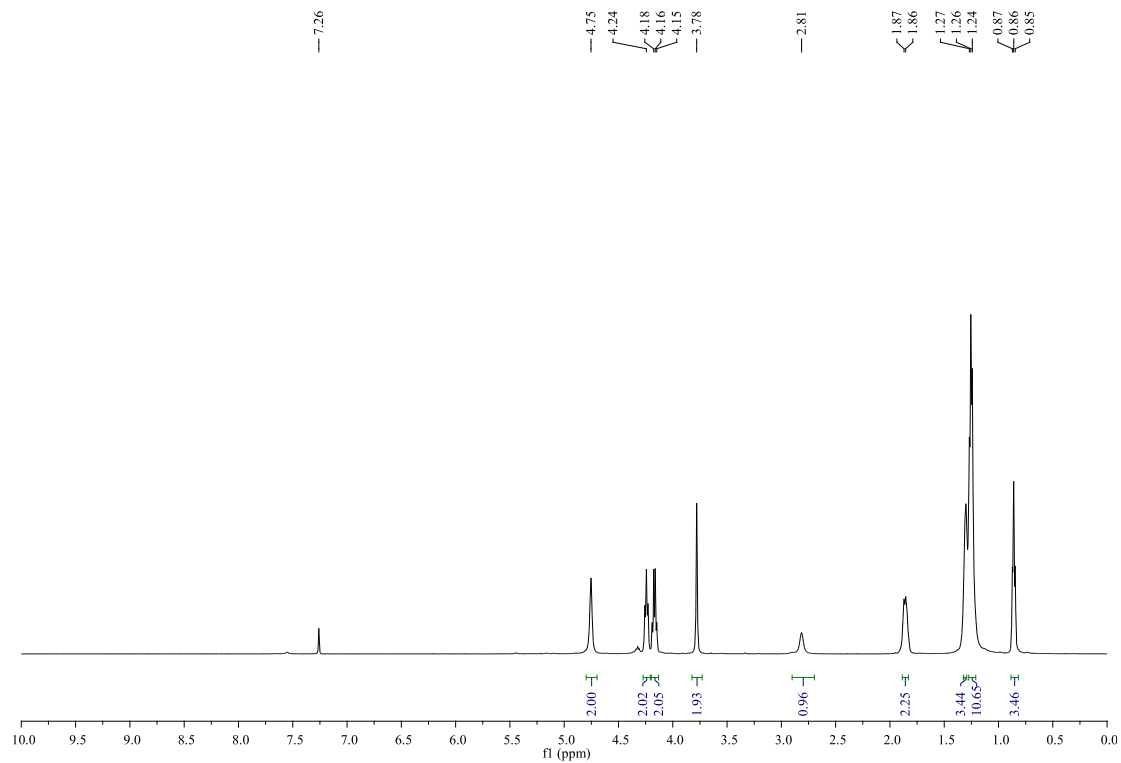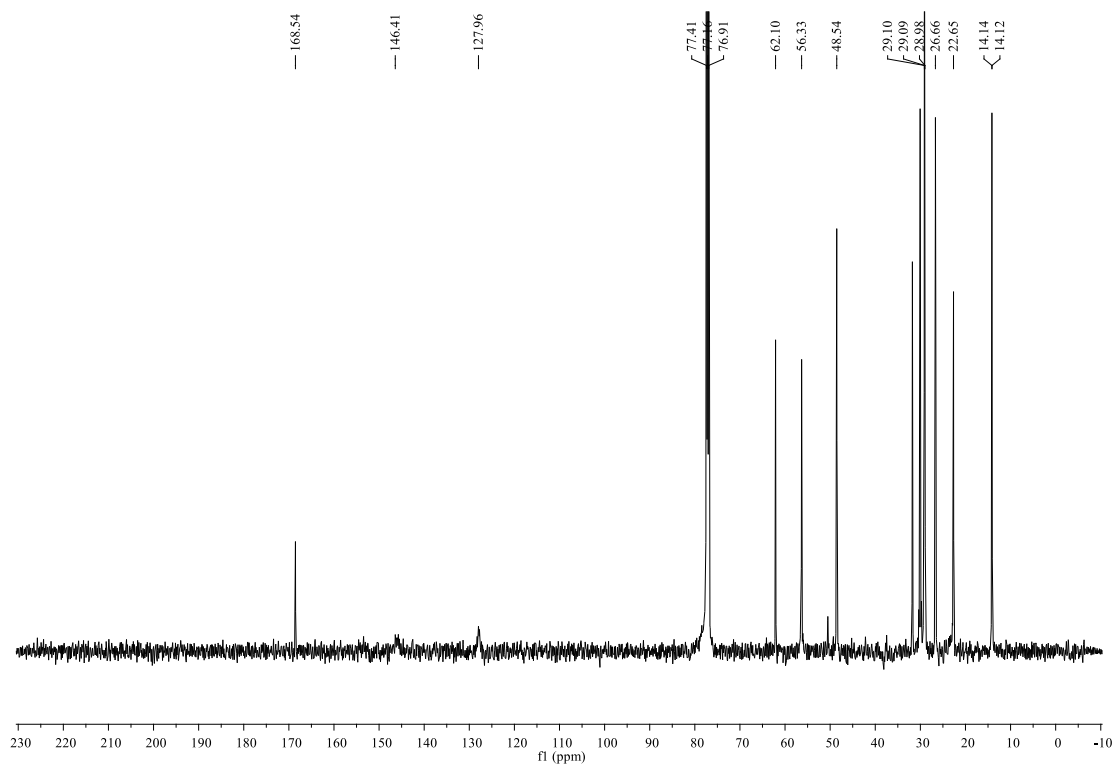

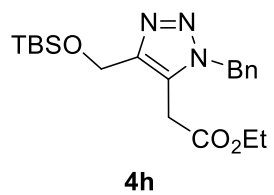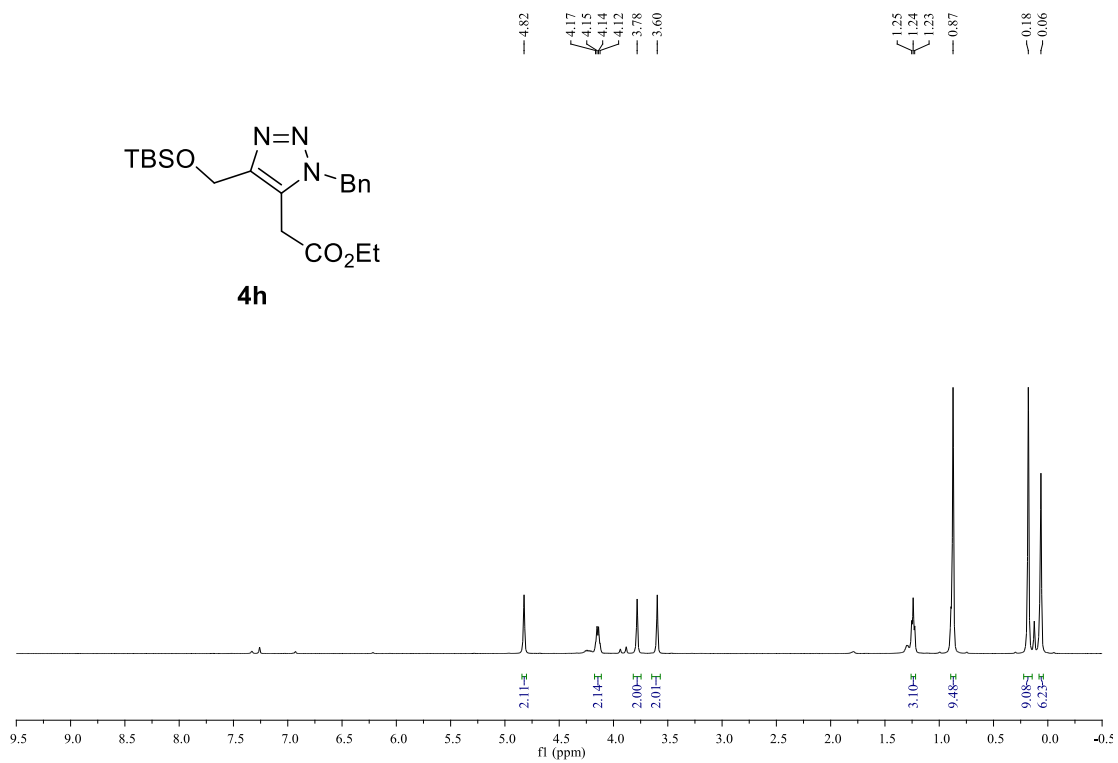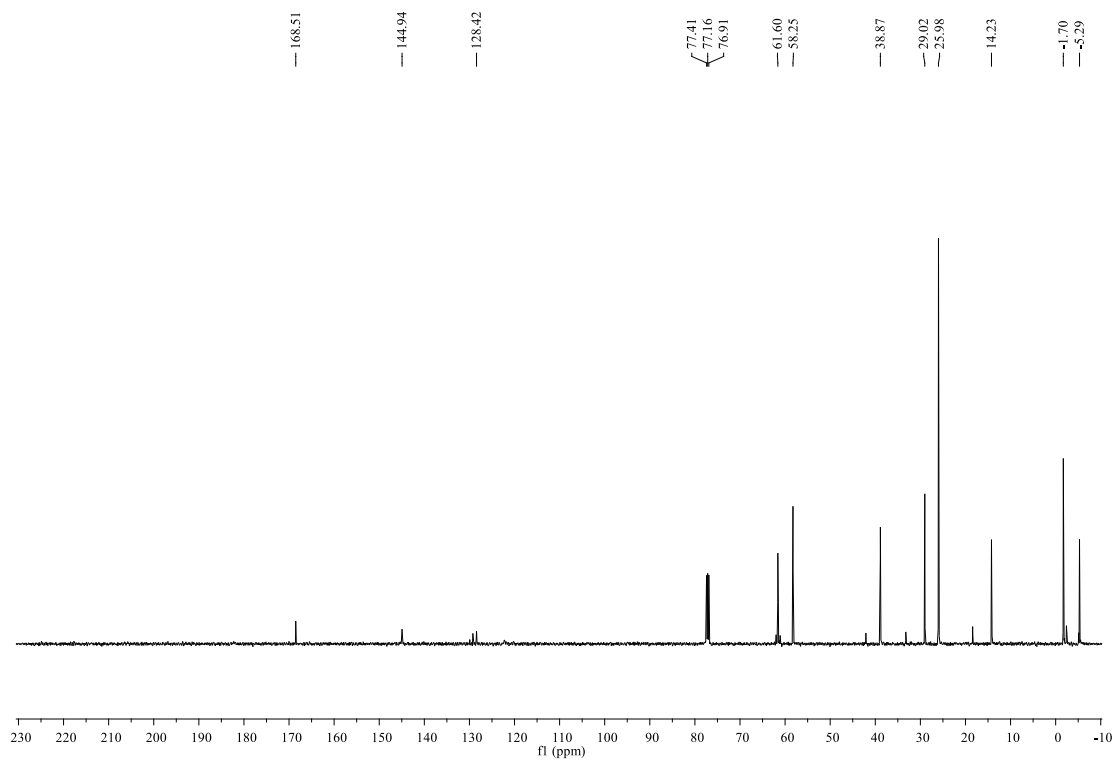

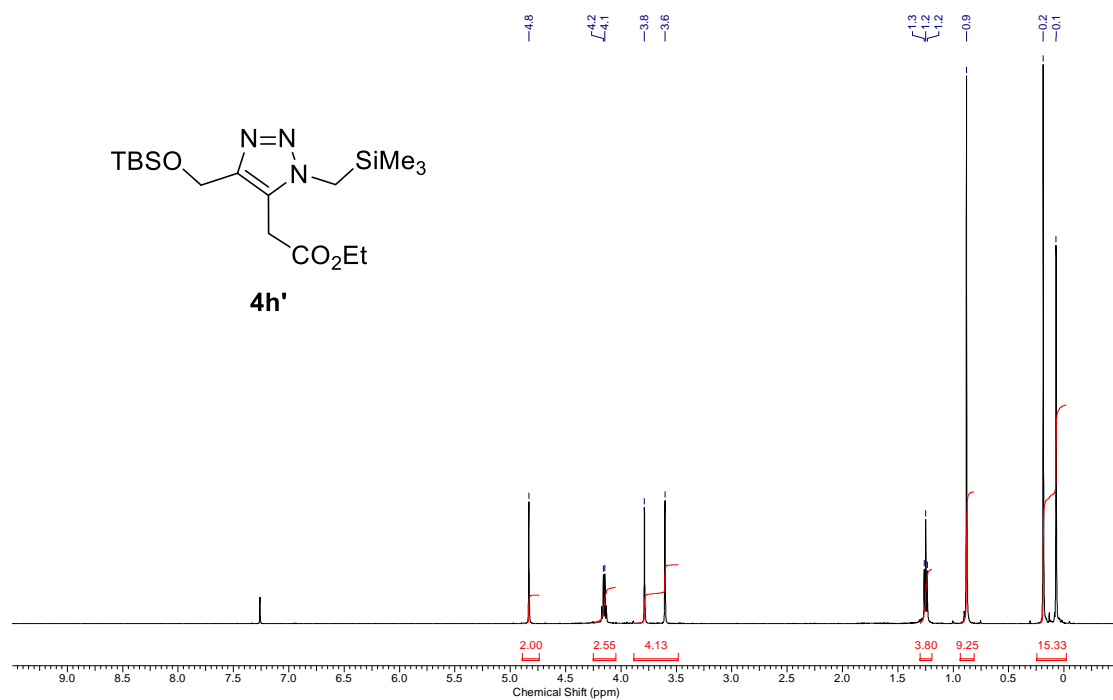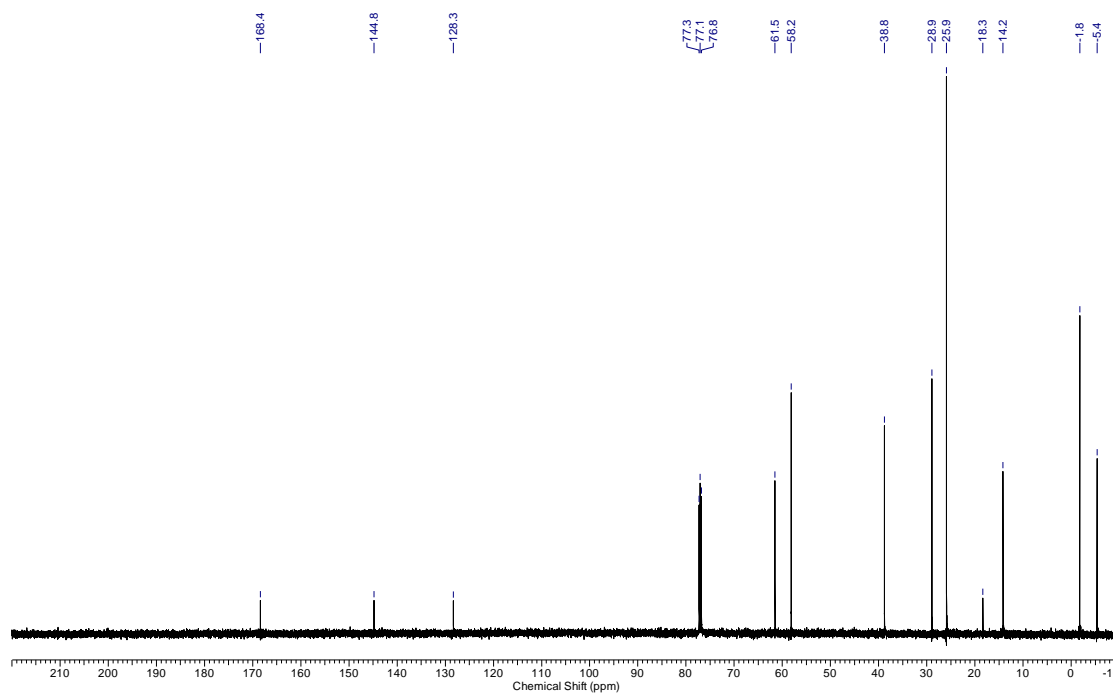

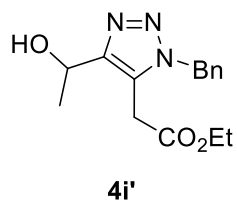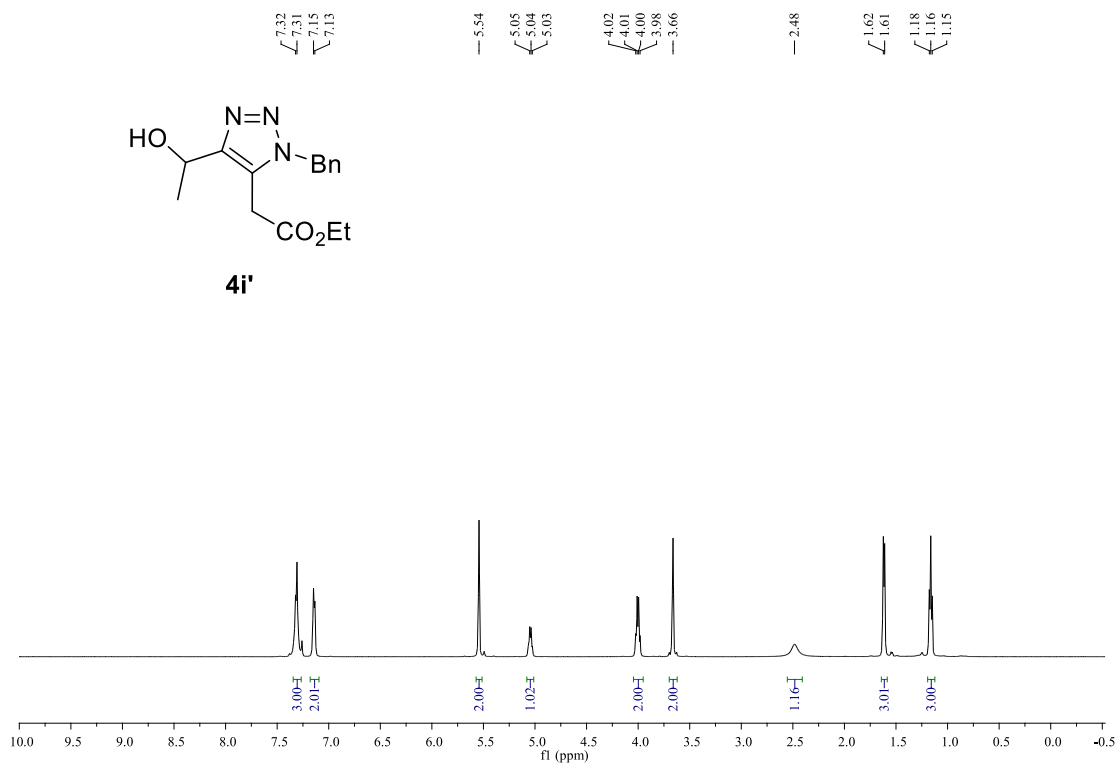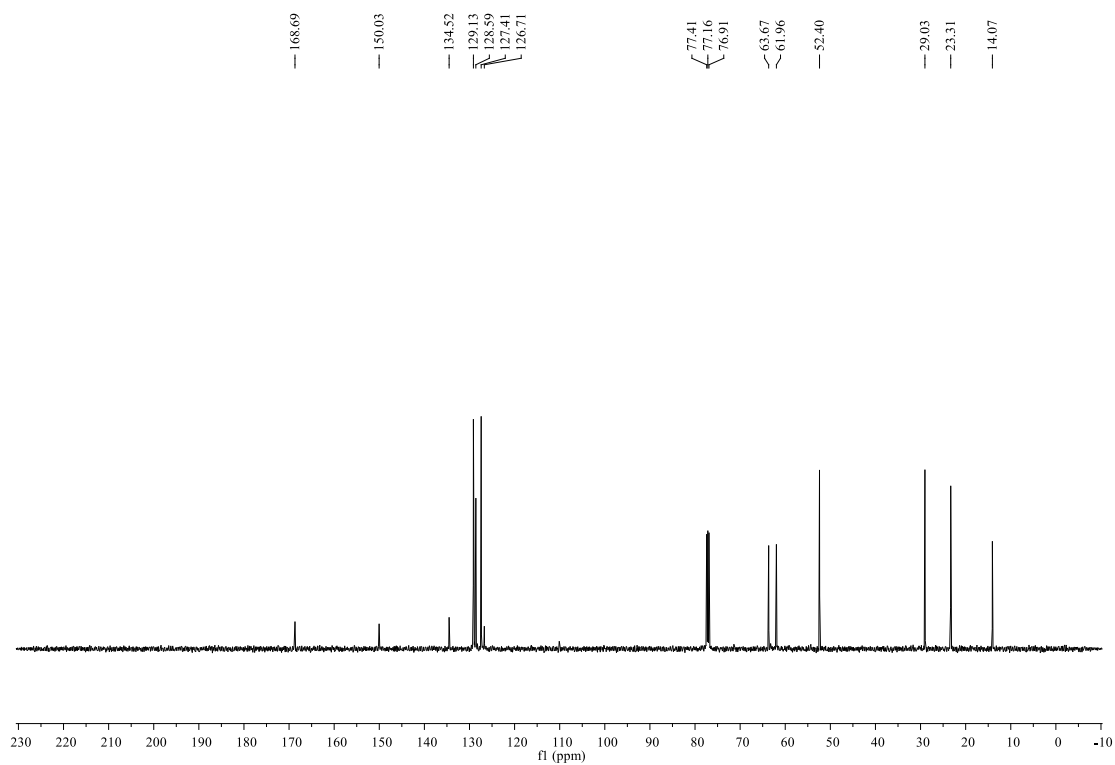

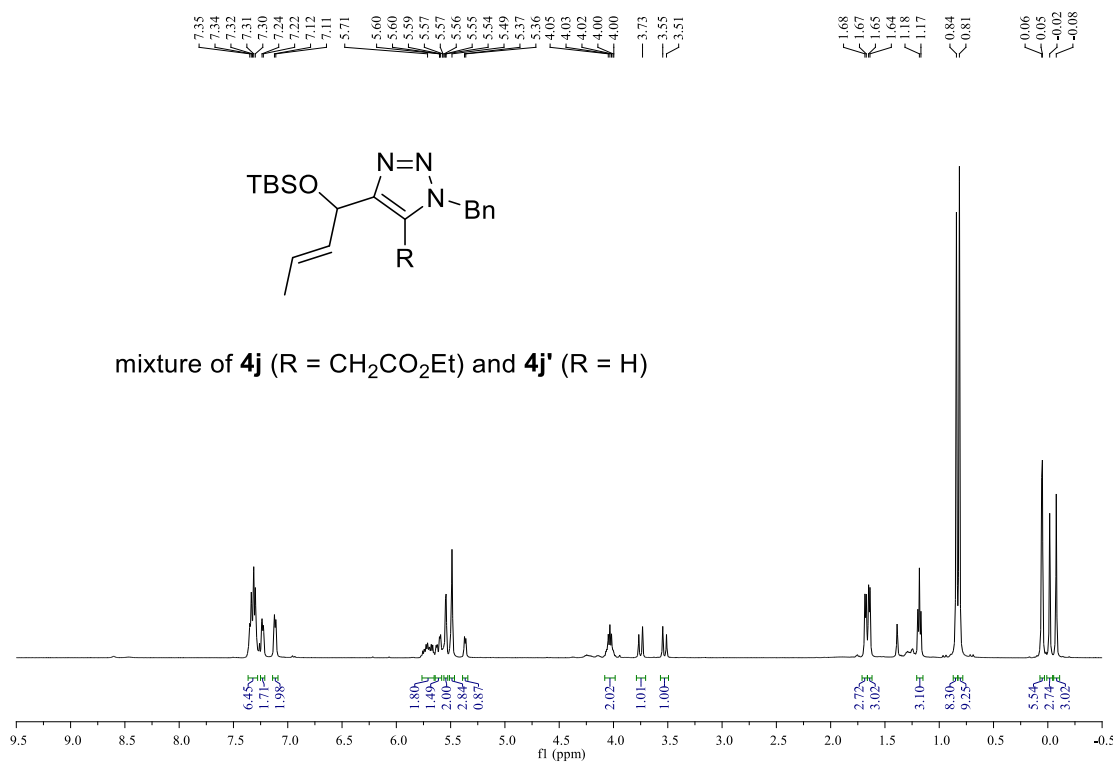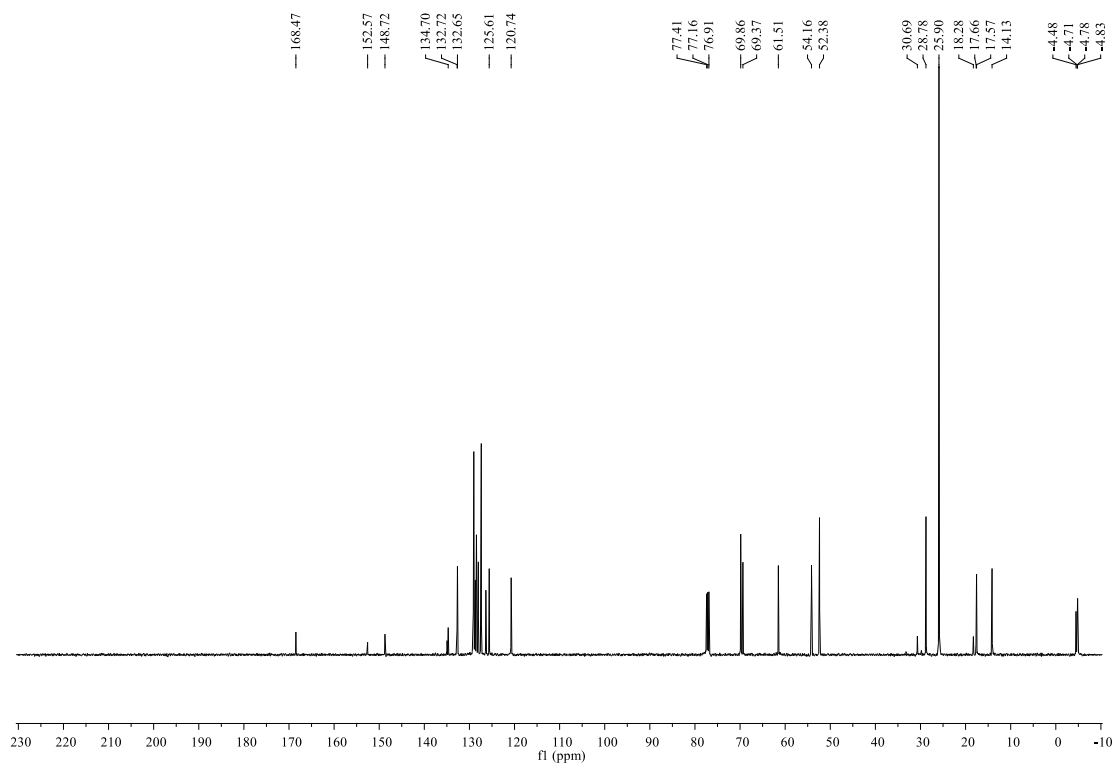



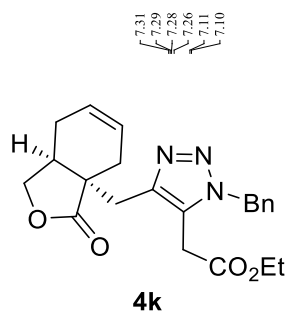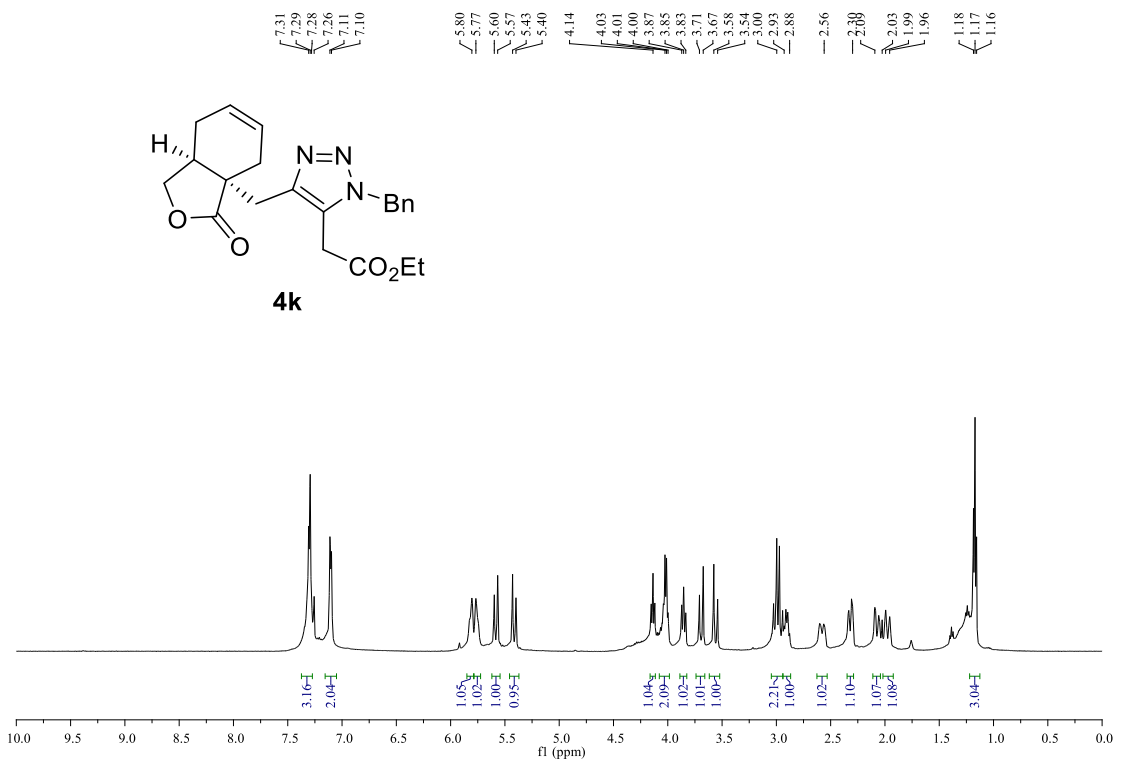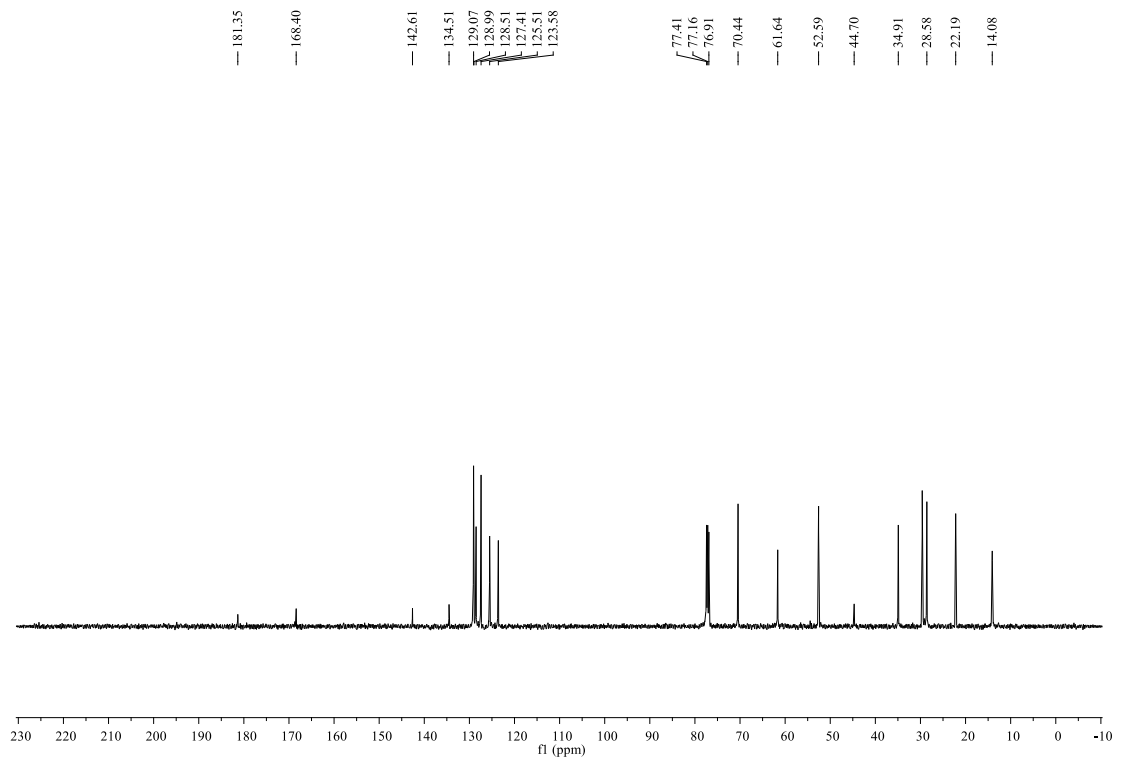

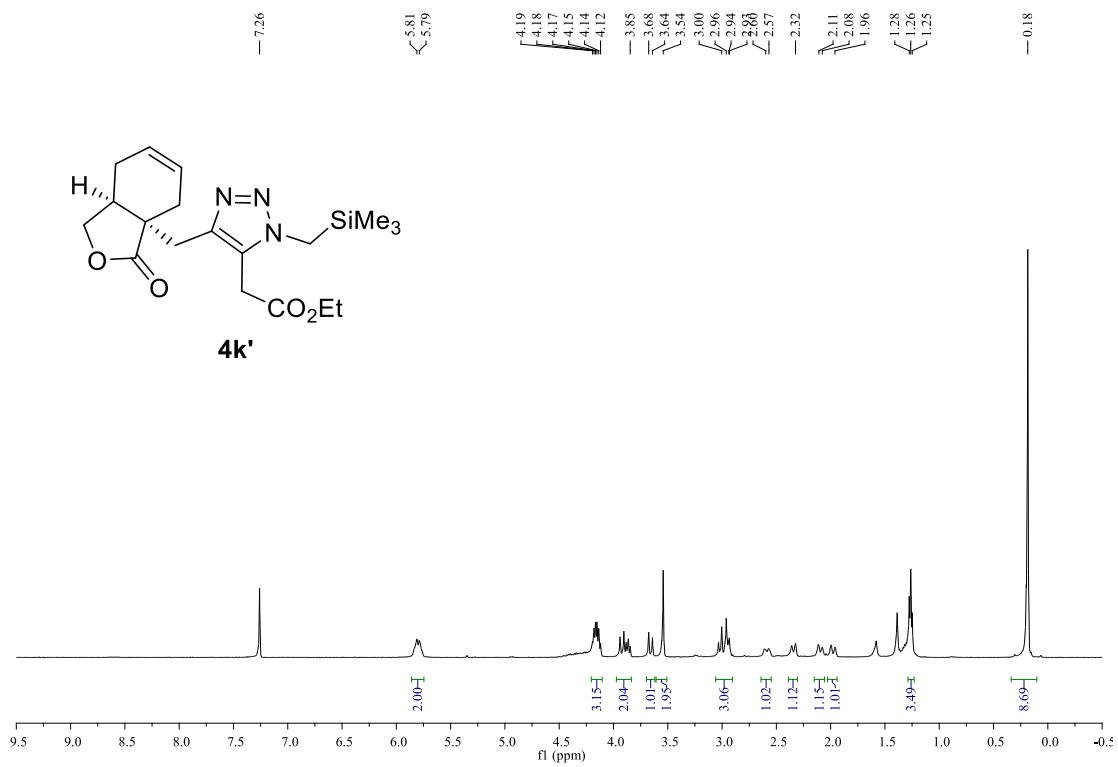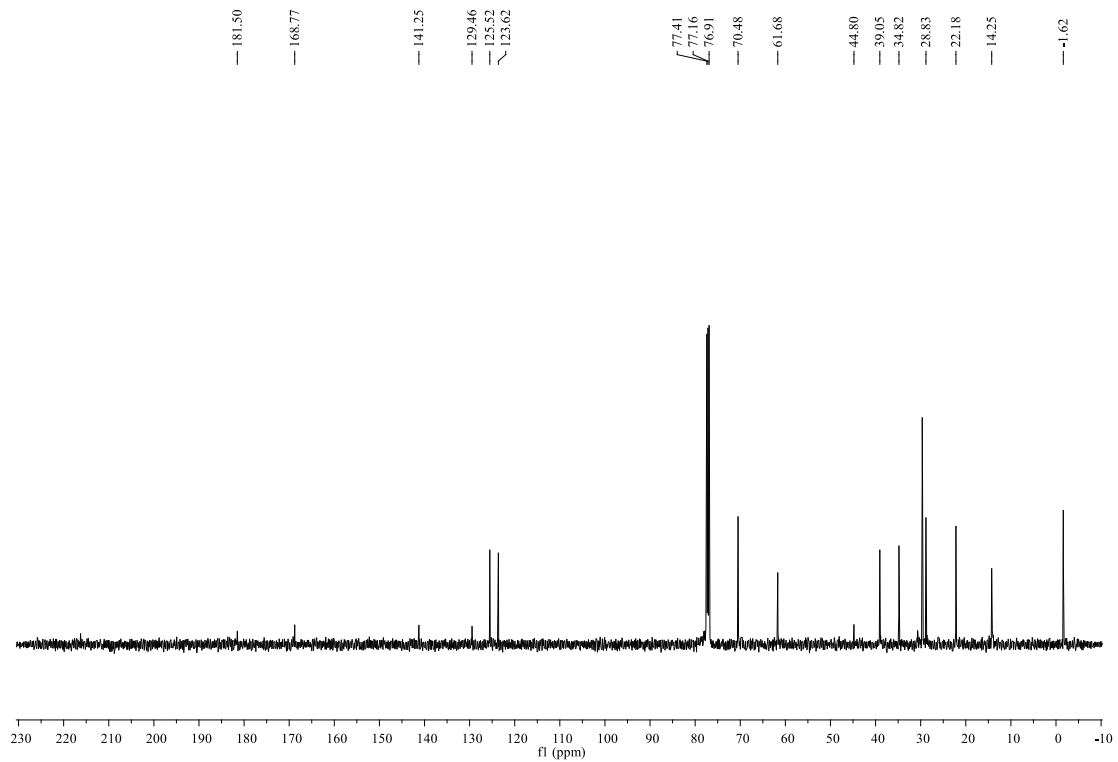

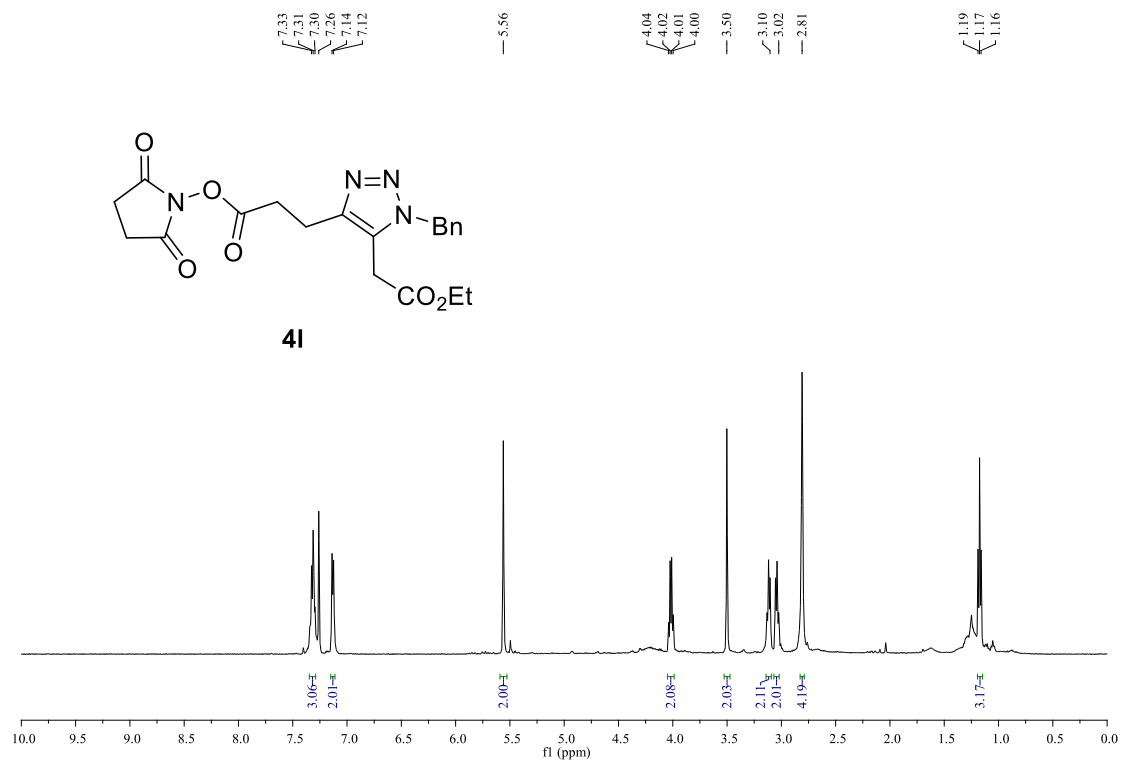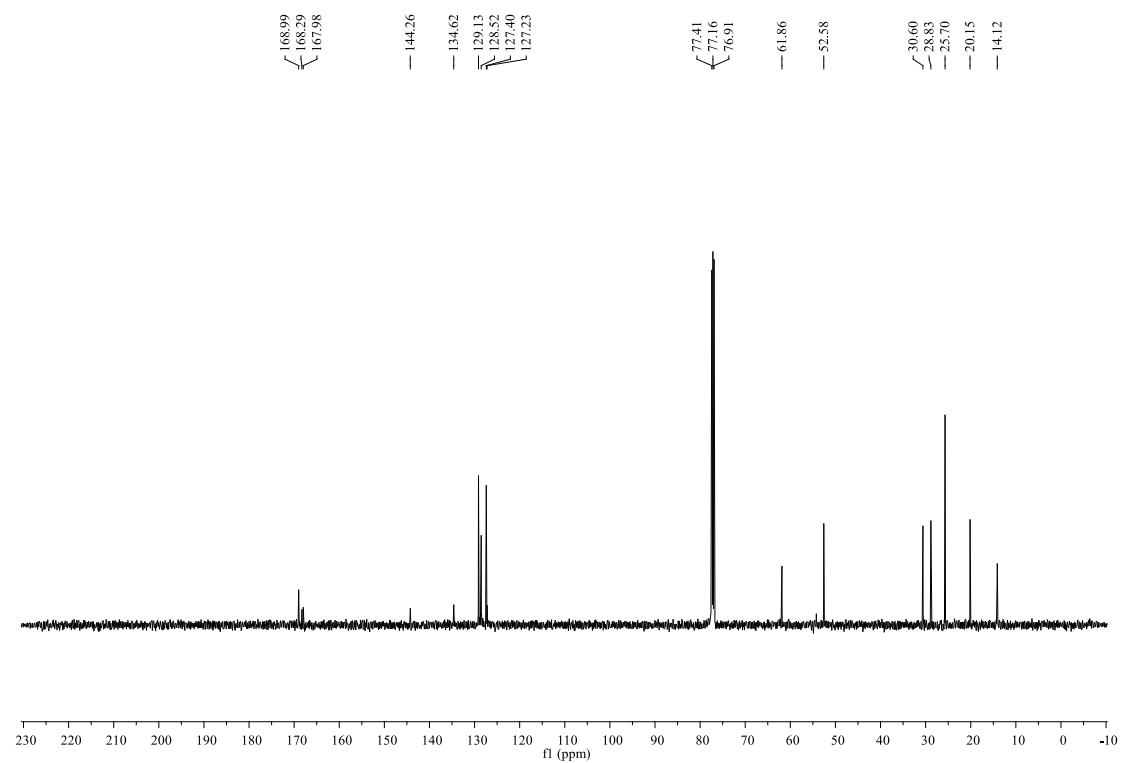

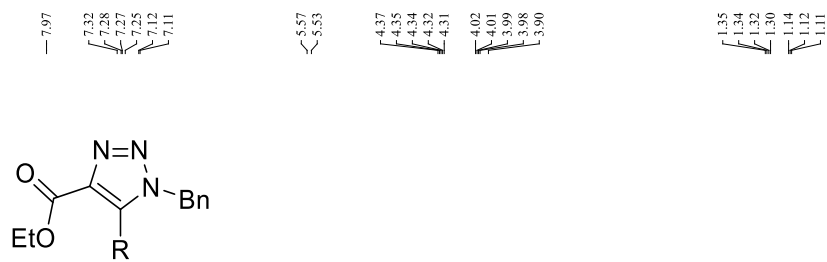

mixture of **4m** (R=CH<sub>2</sub>CO<sub>2</sub>Et) and **4m'** (R=H)

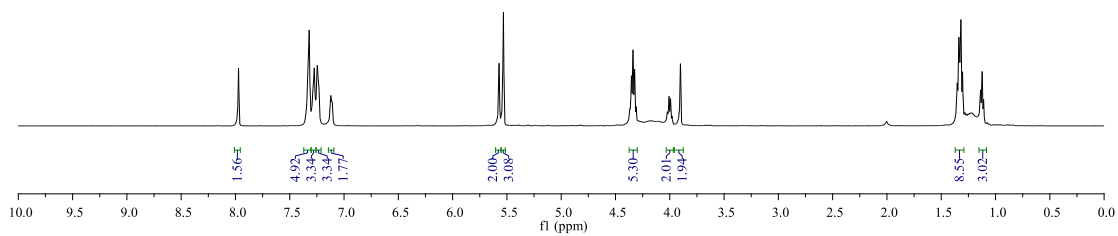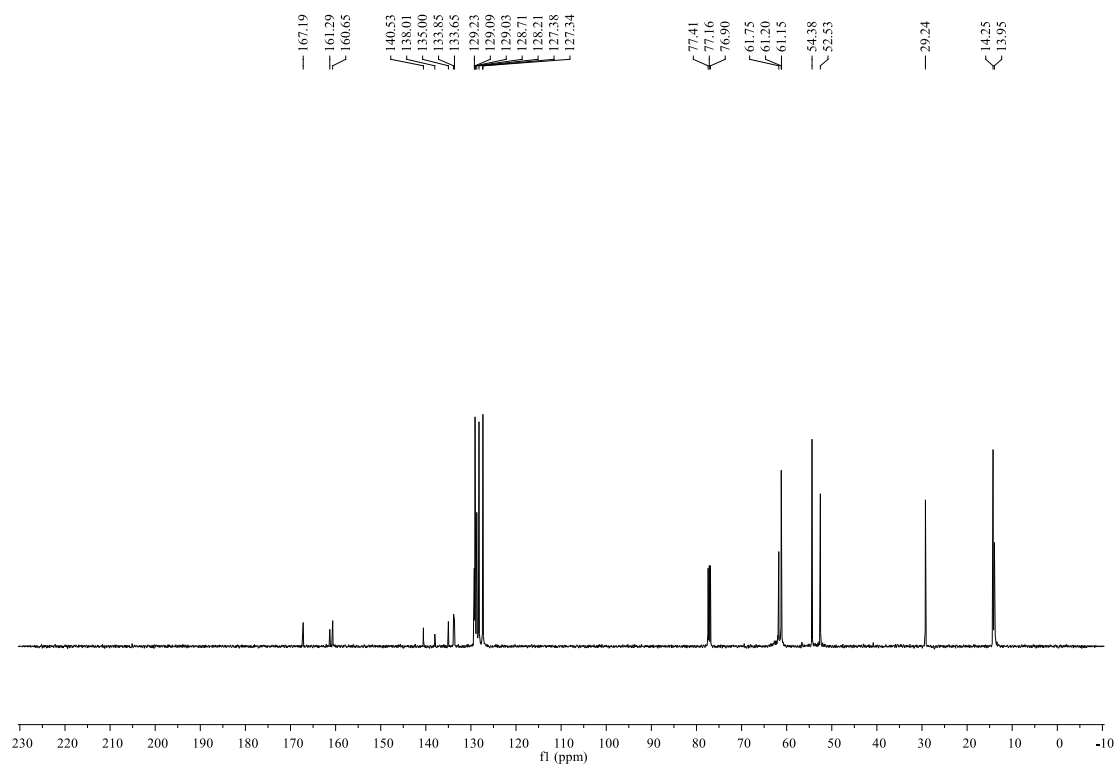

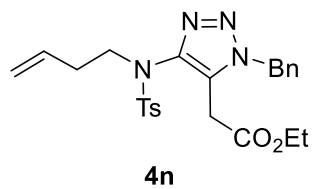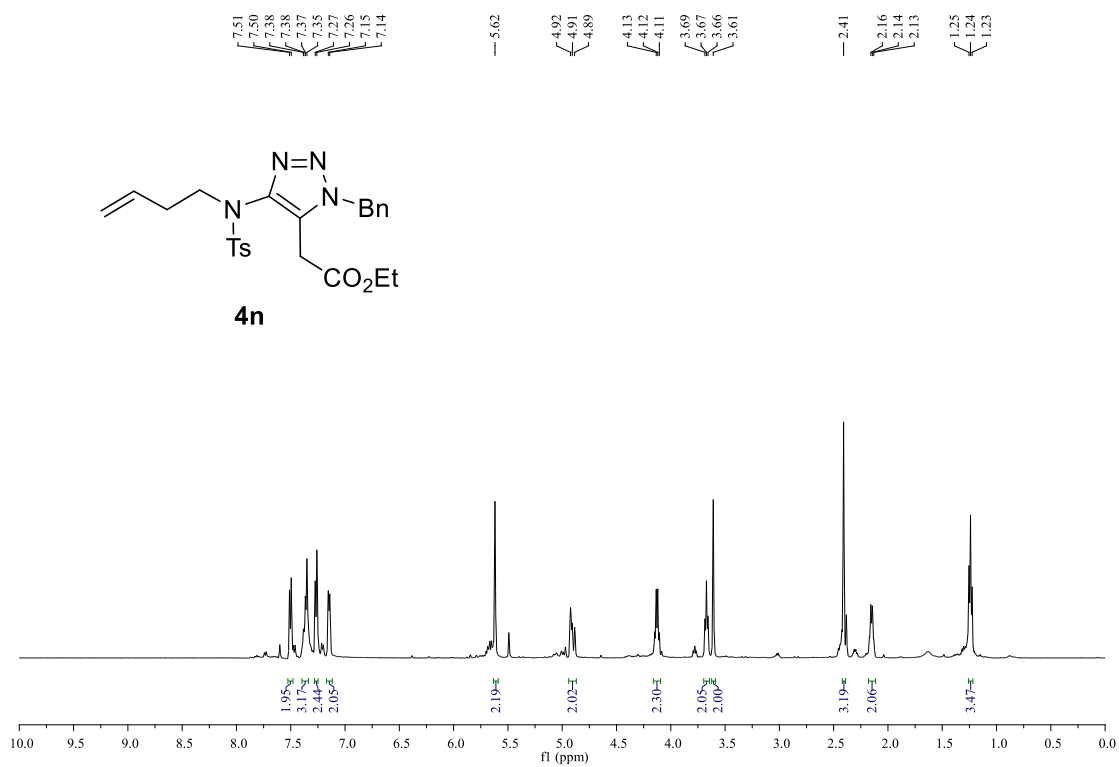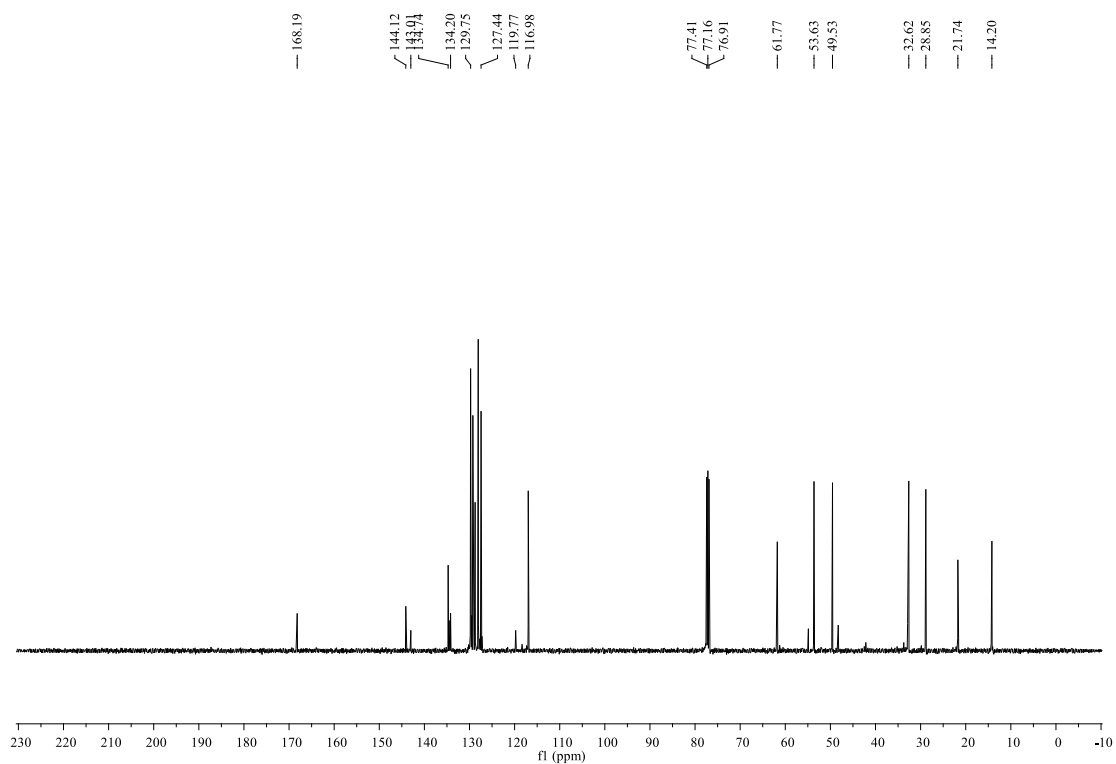

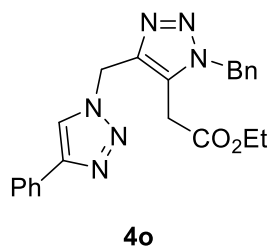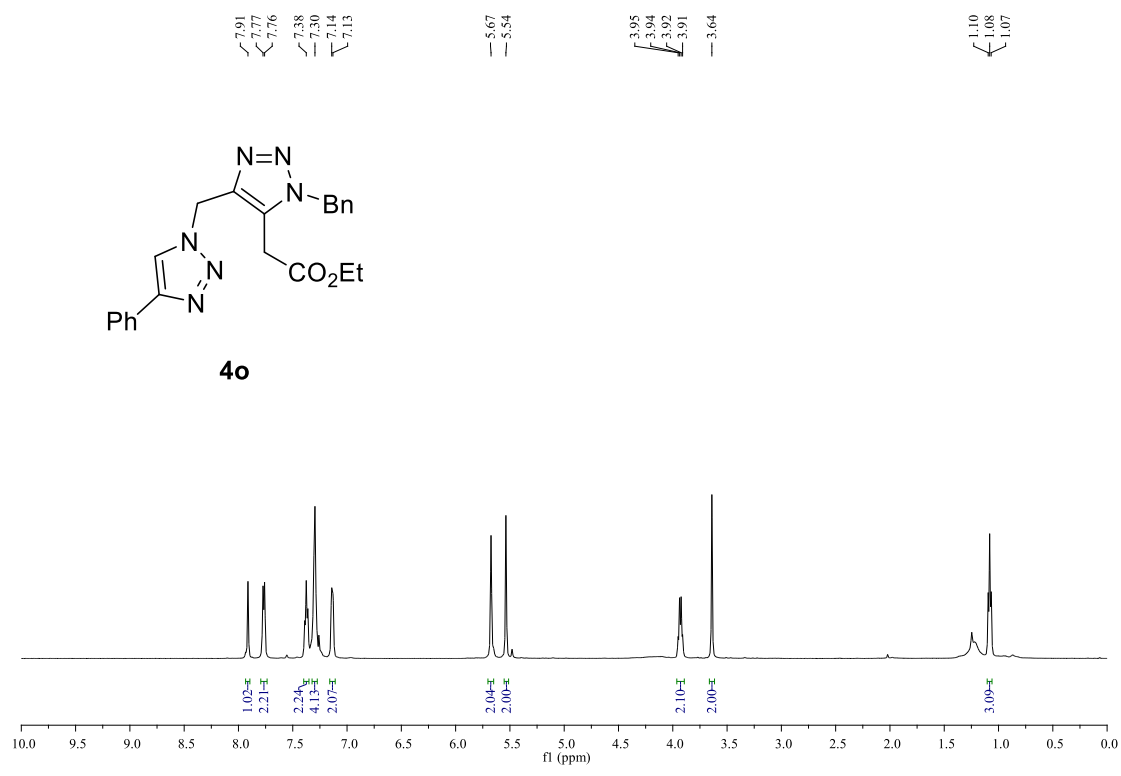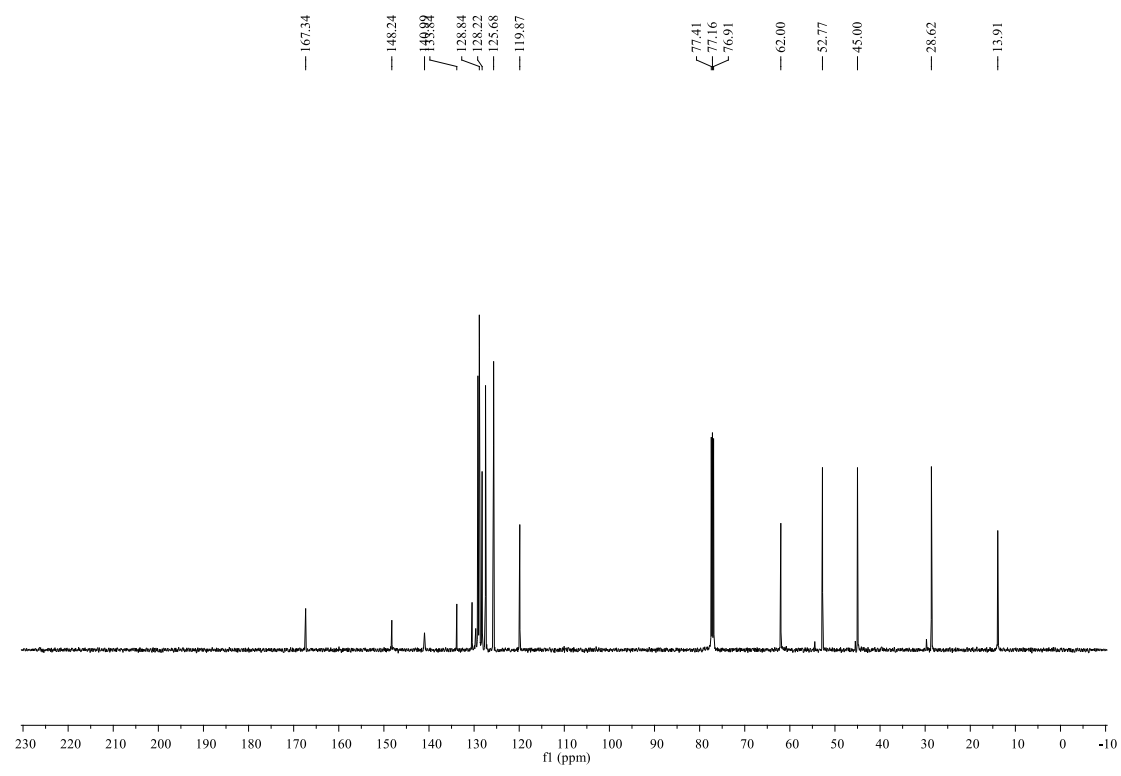

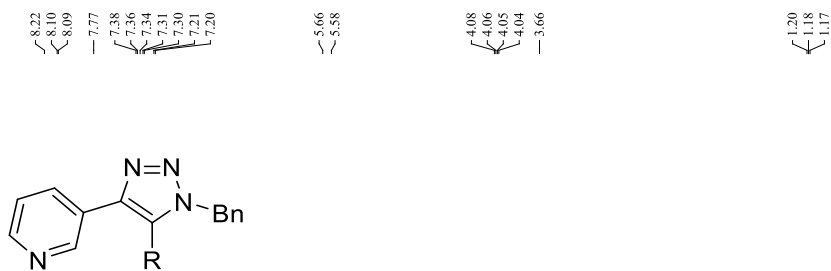

mixture of **4p** (R=CH<sub>2</sub>CO<sub>2</sub>Et) and **4p'** (R=H)

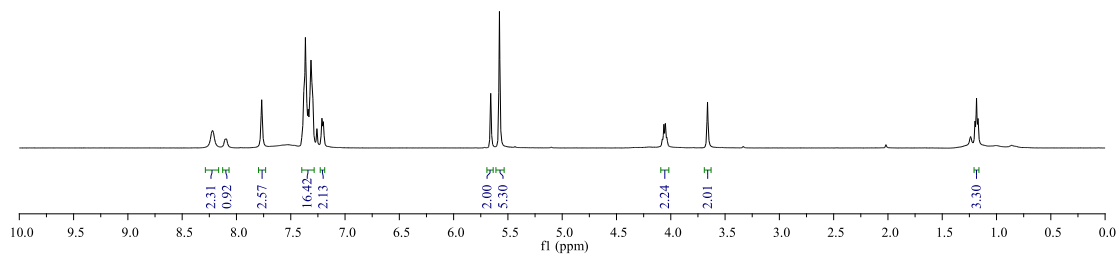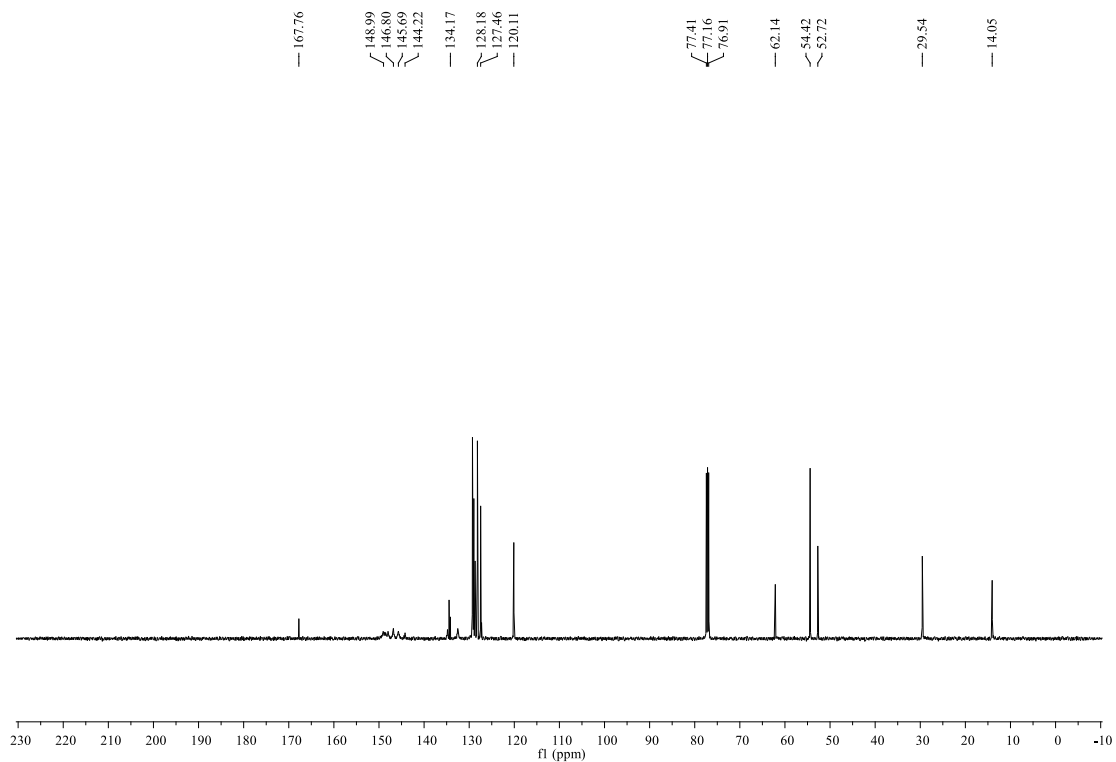

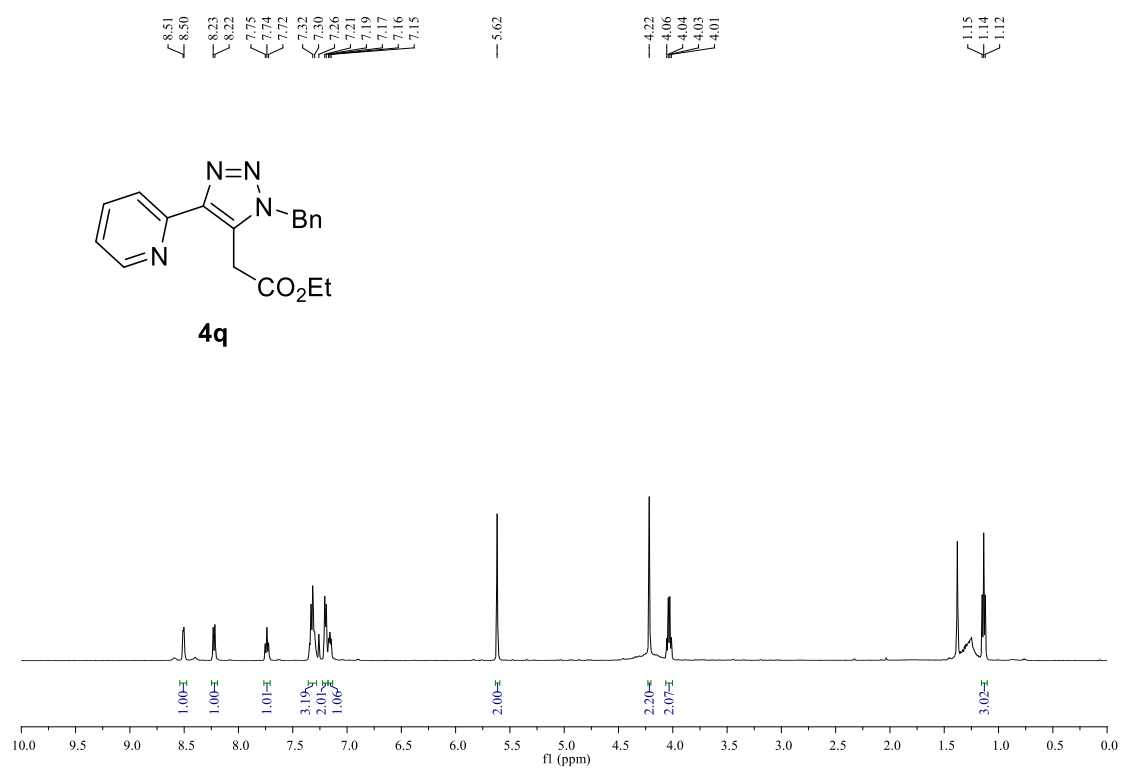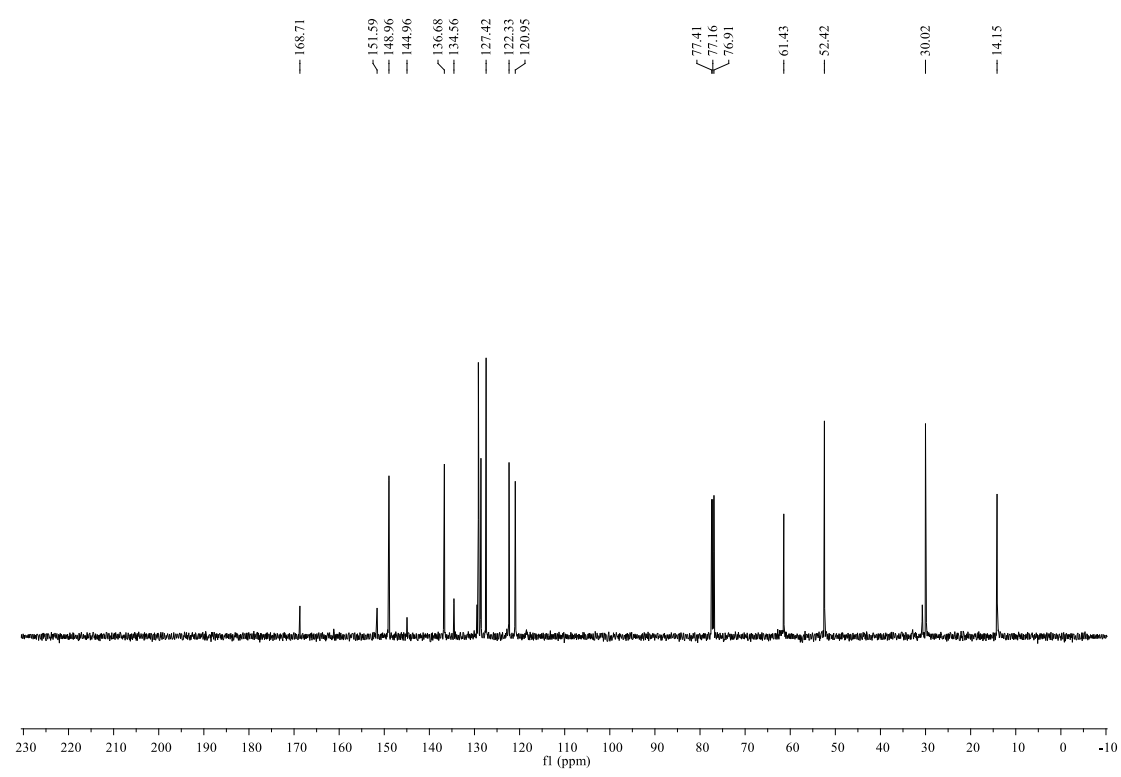



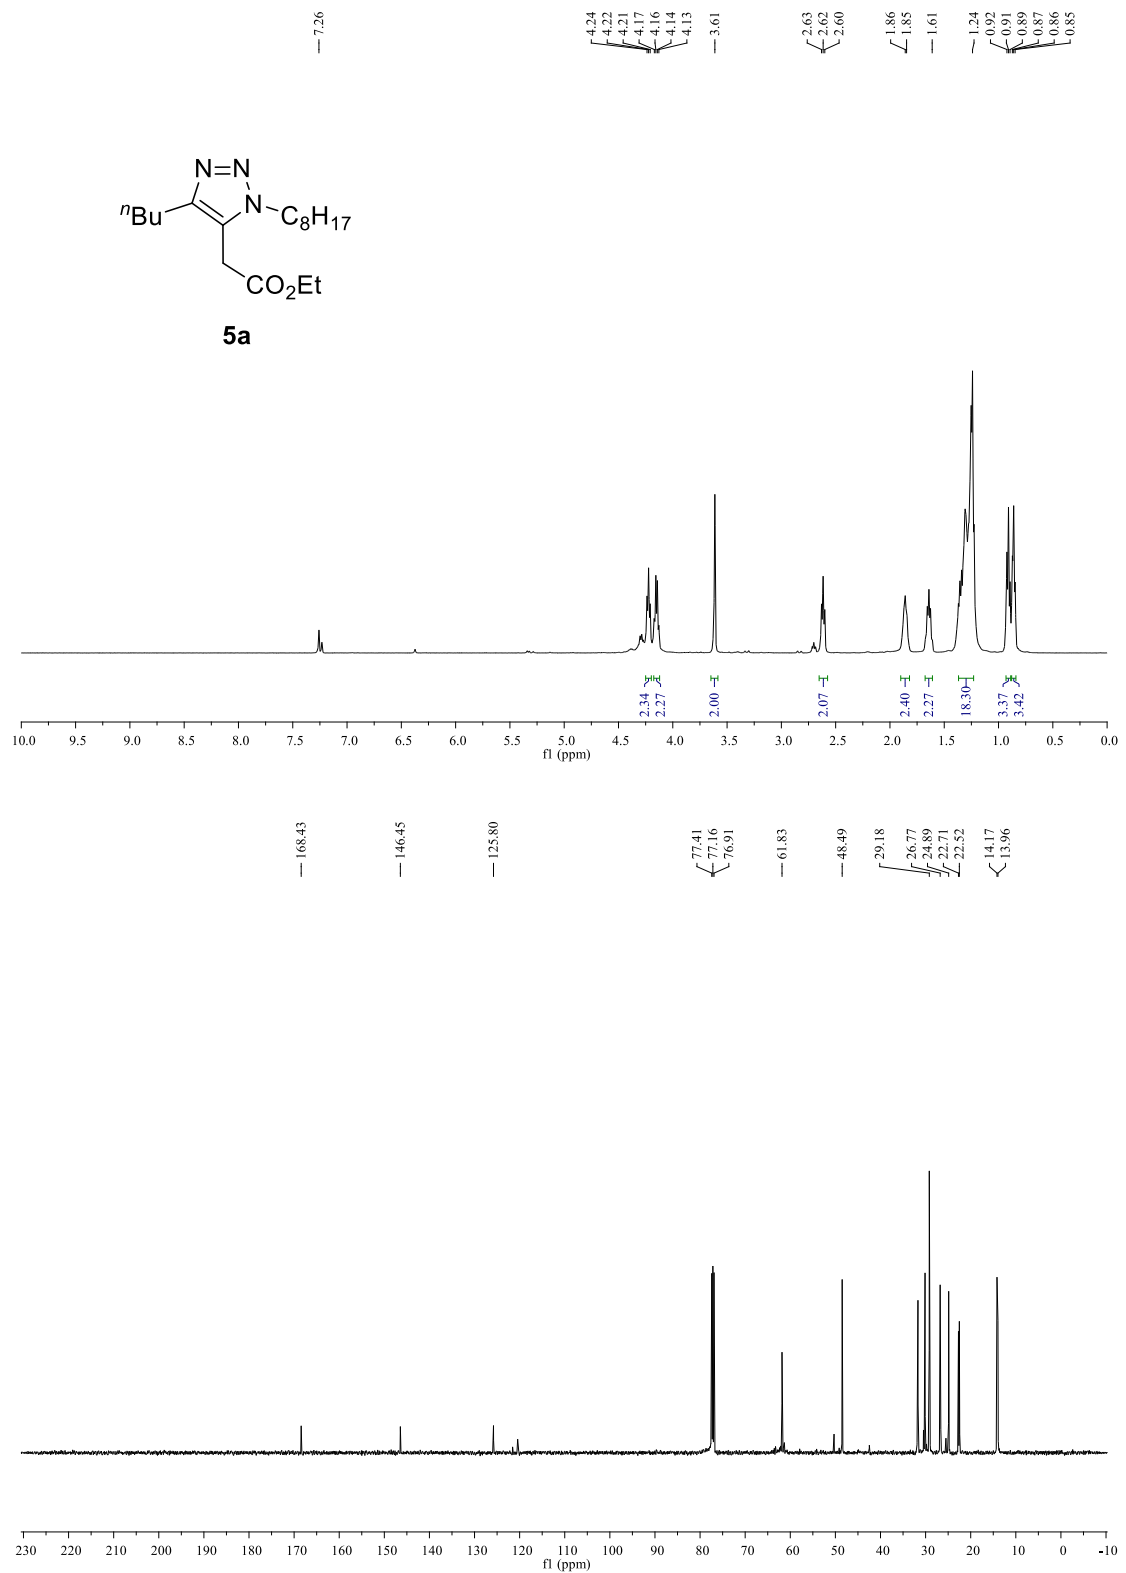

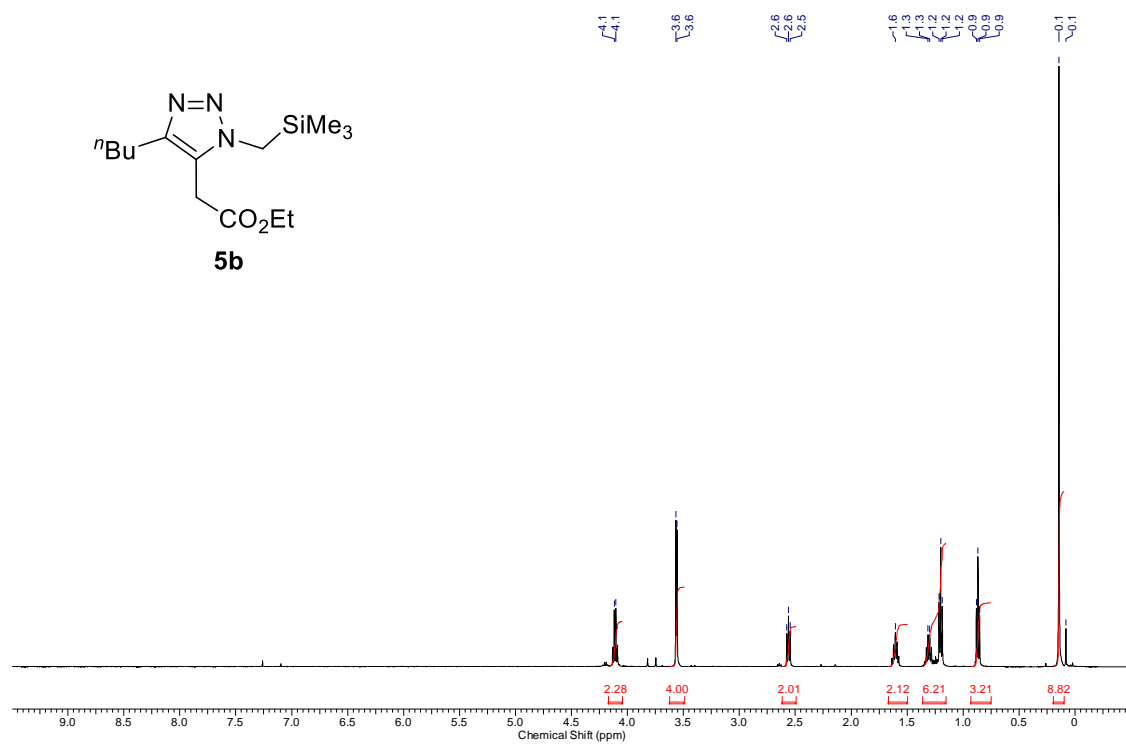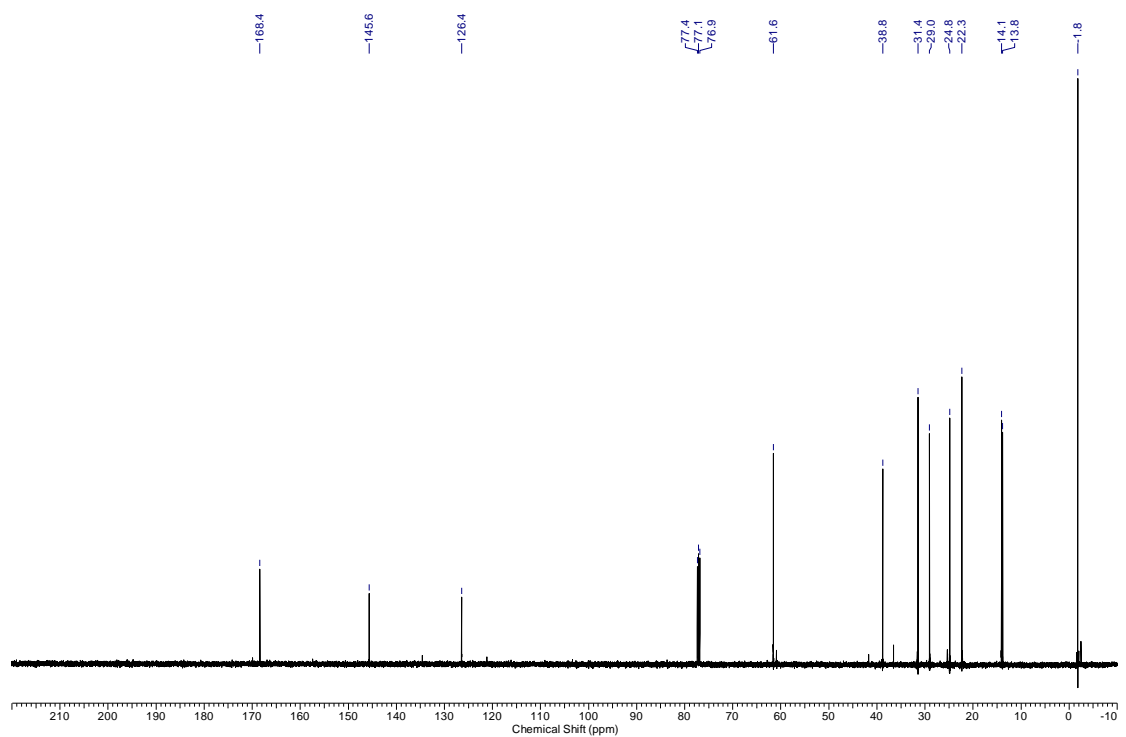

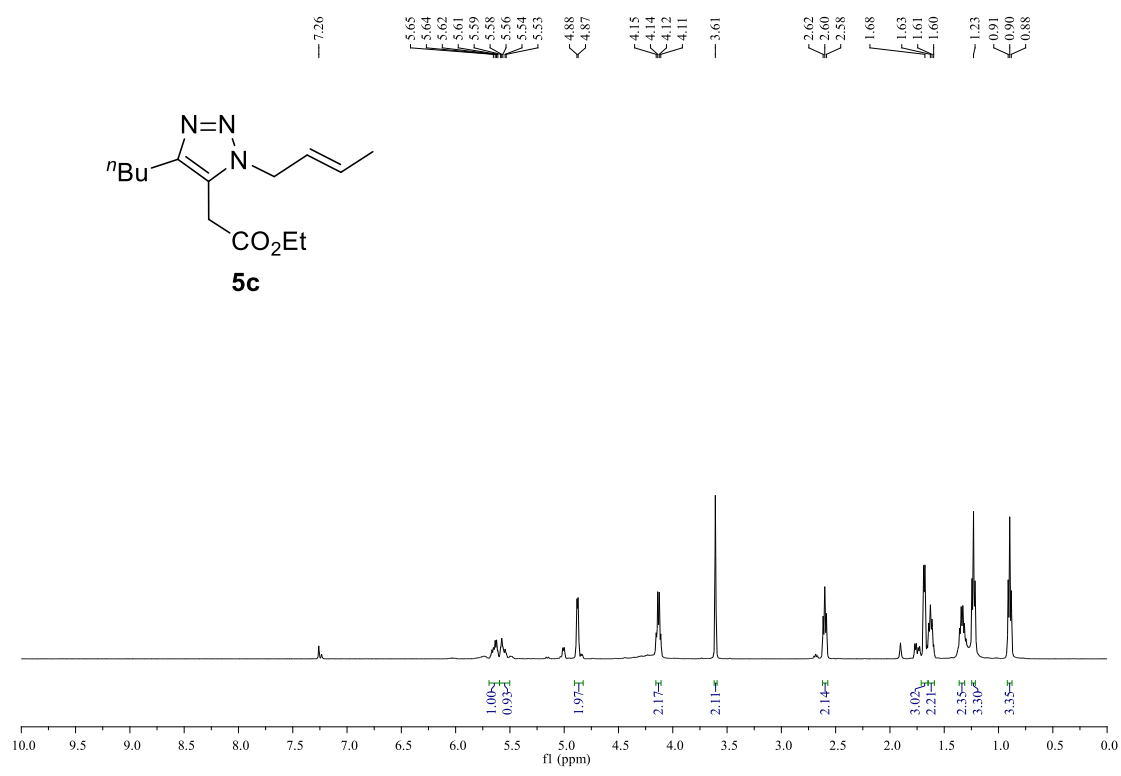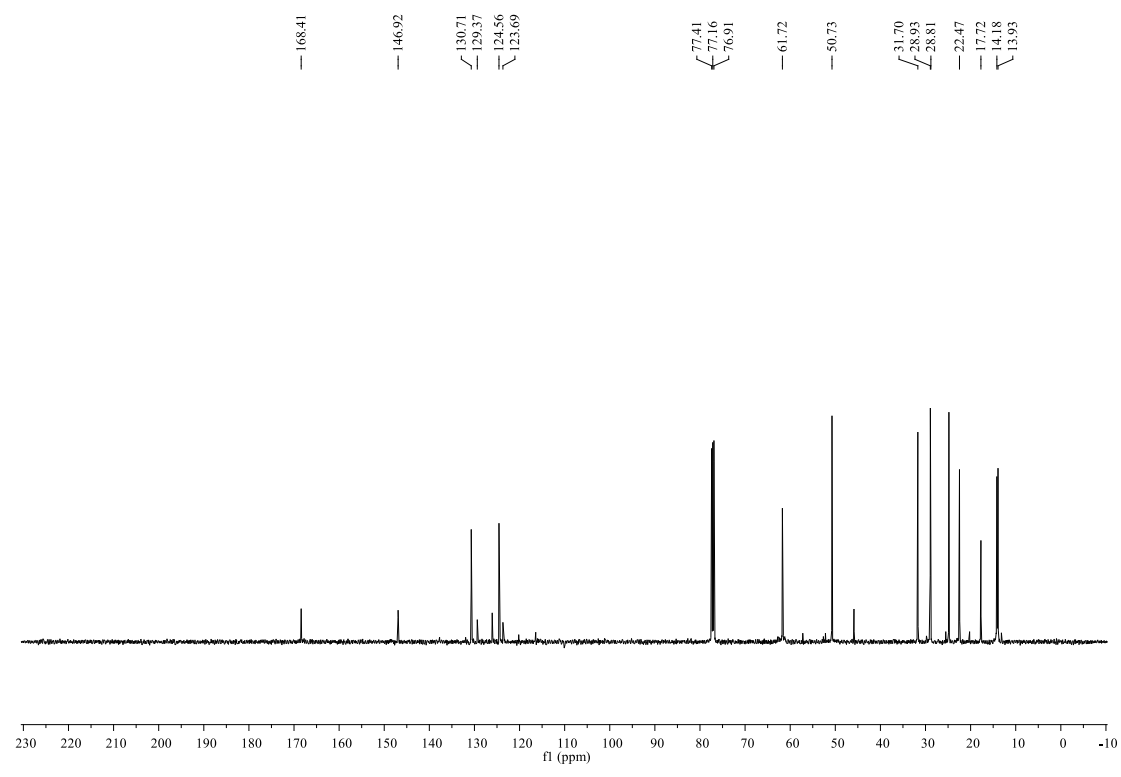

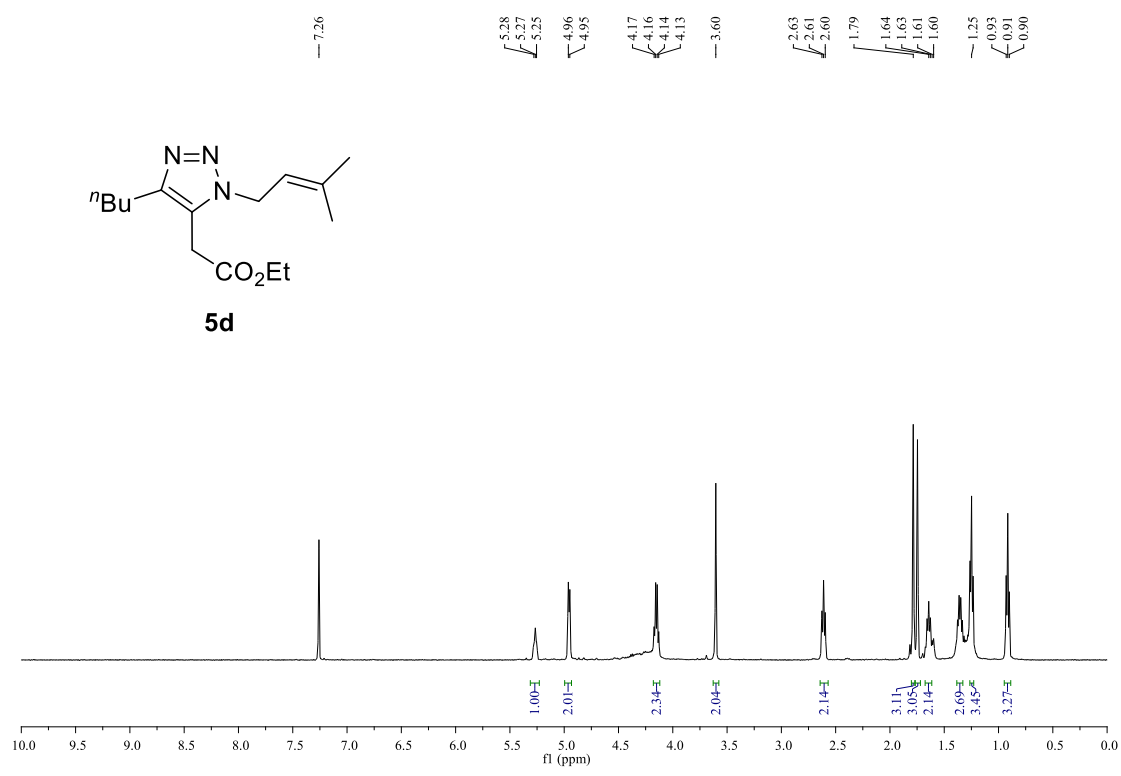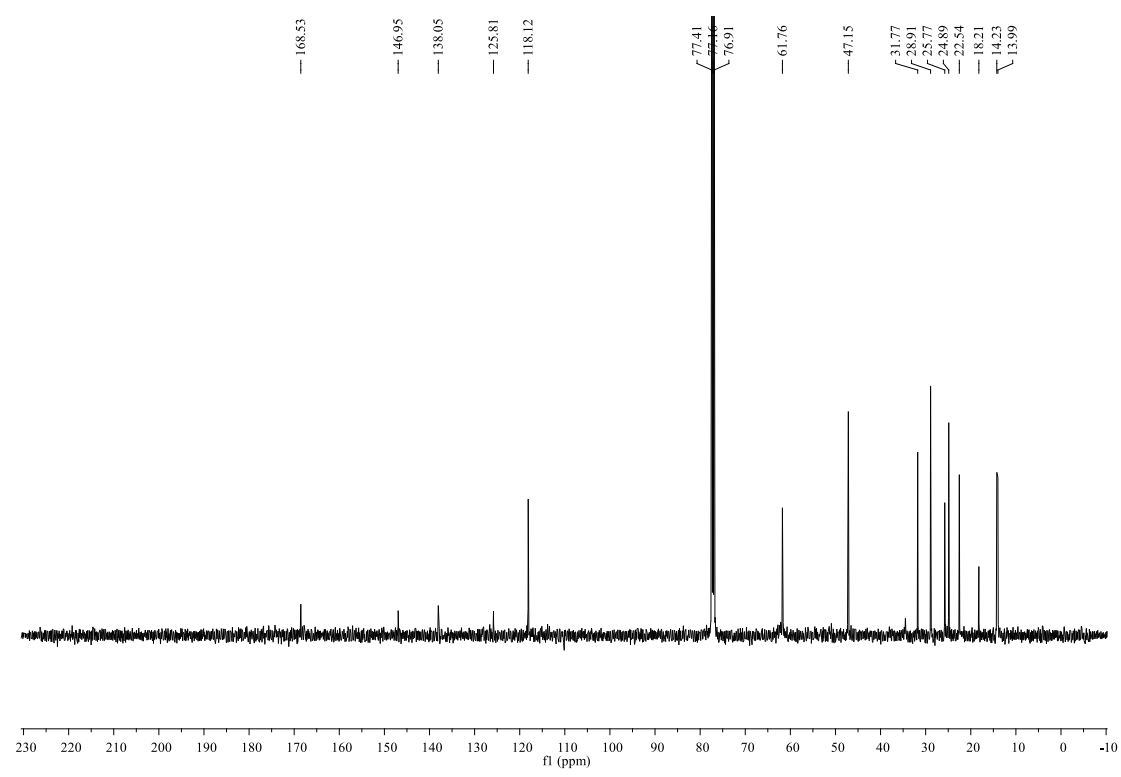

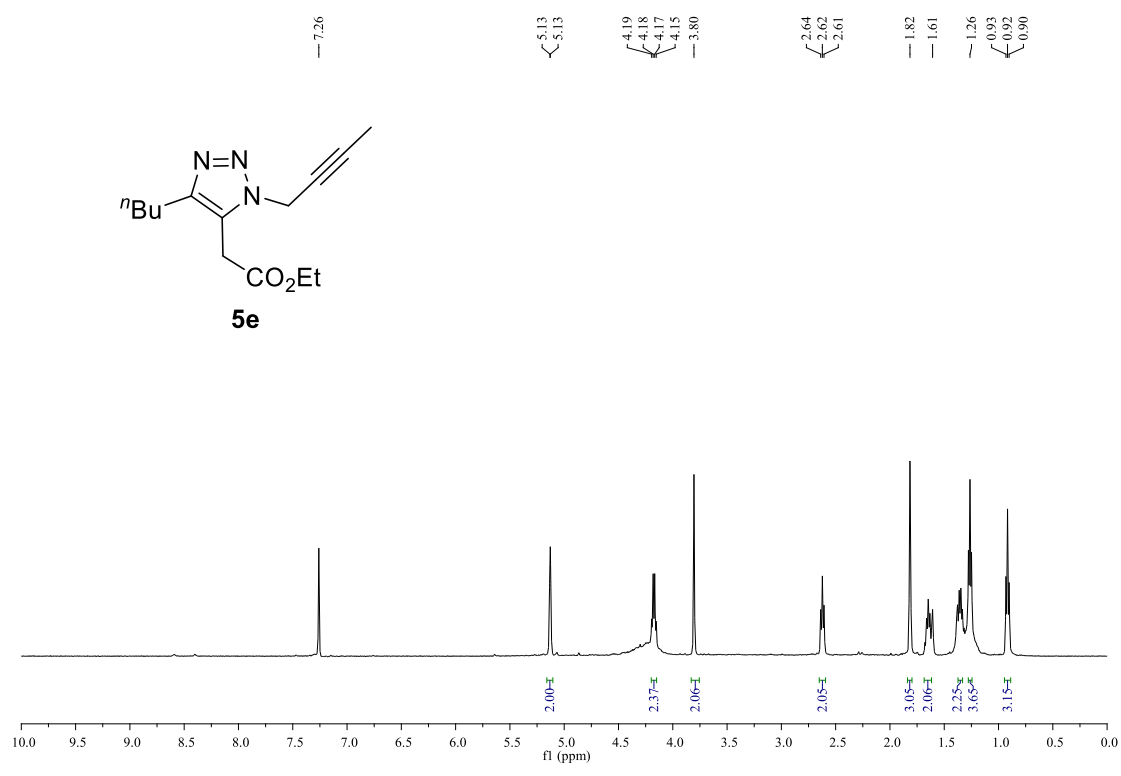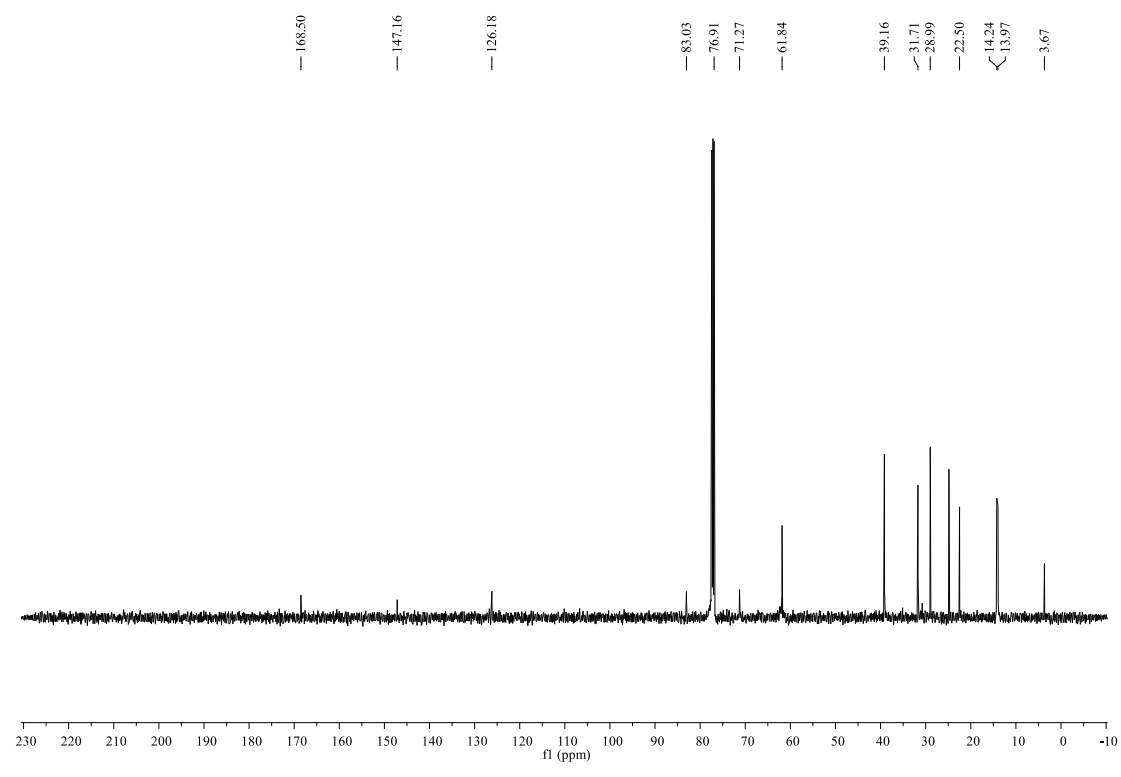

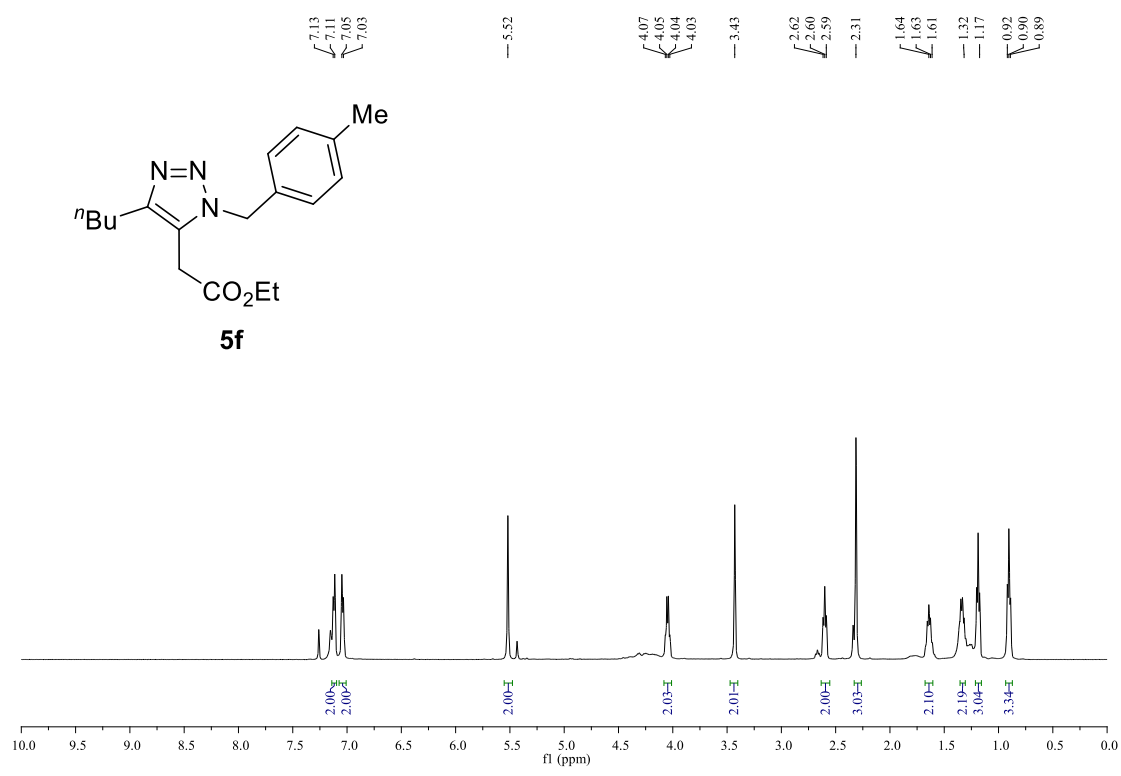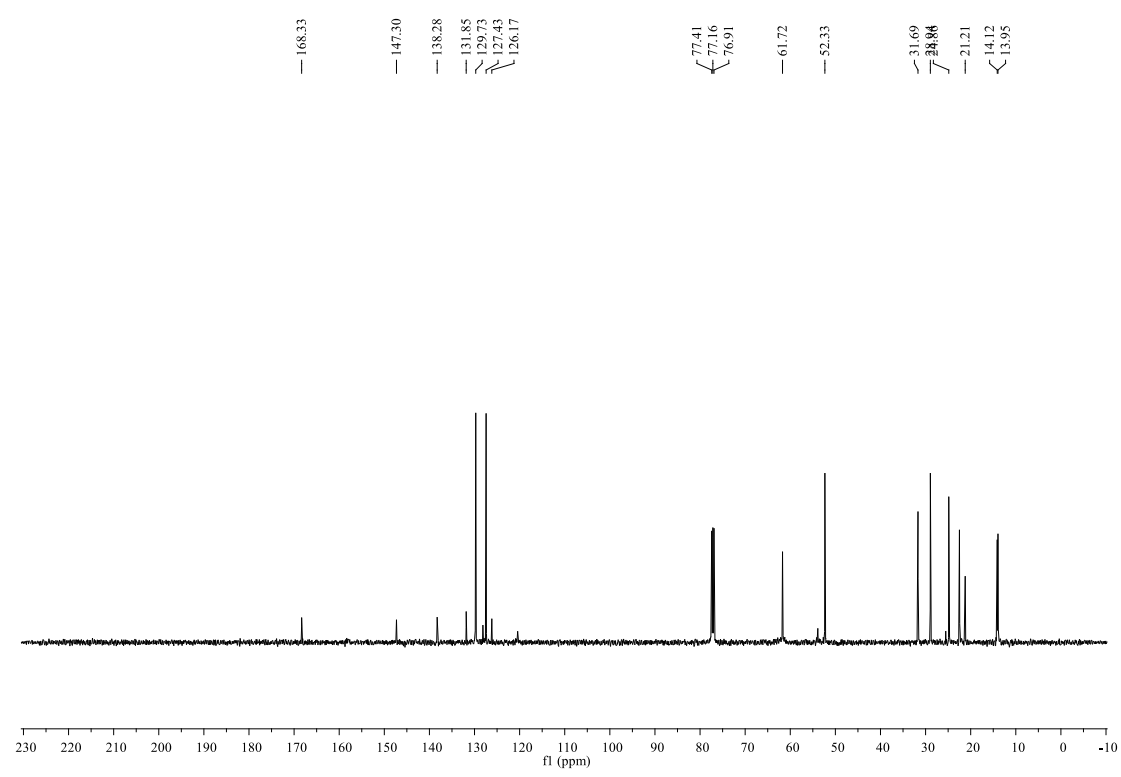

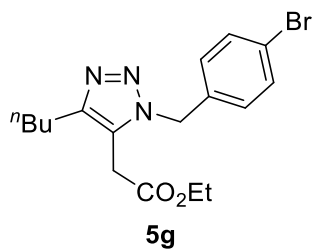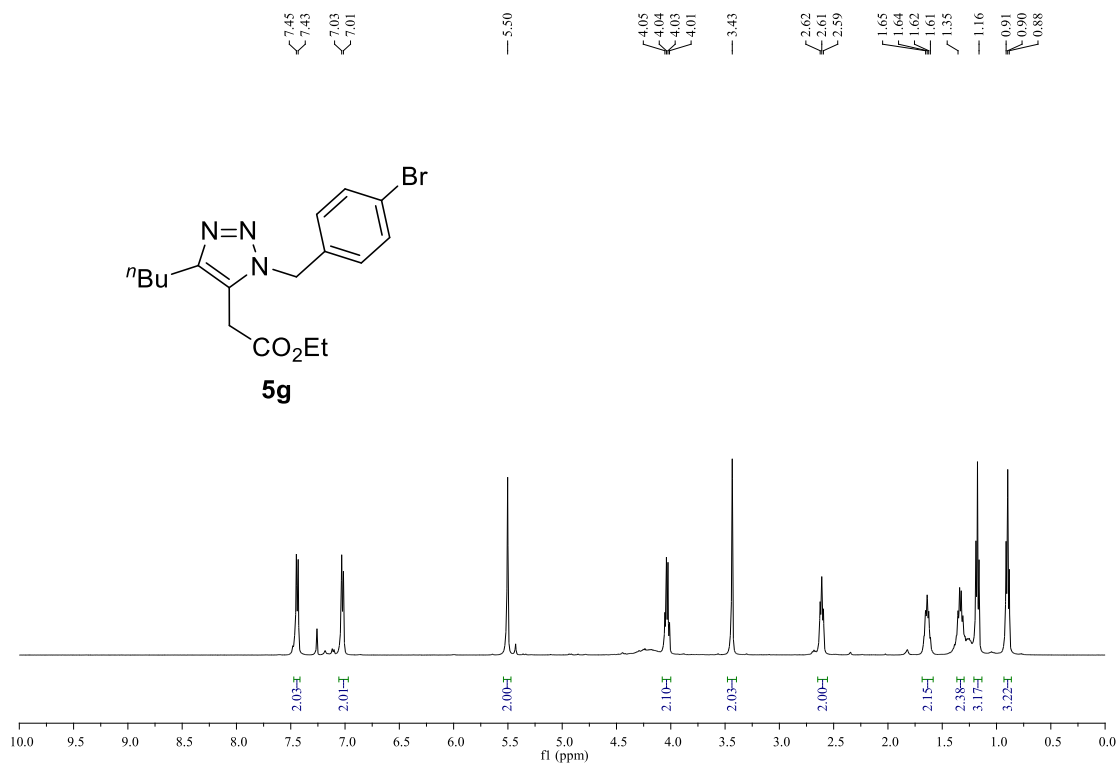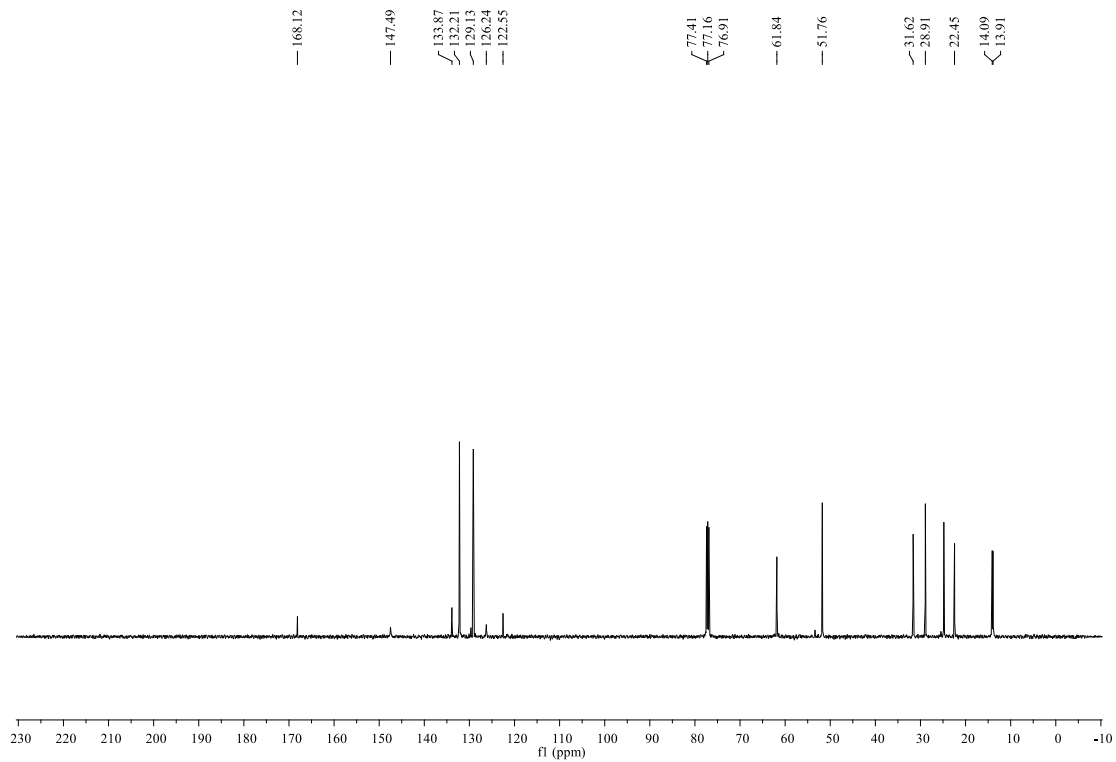

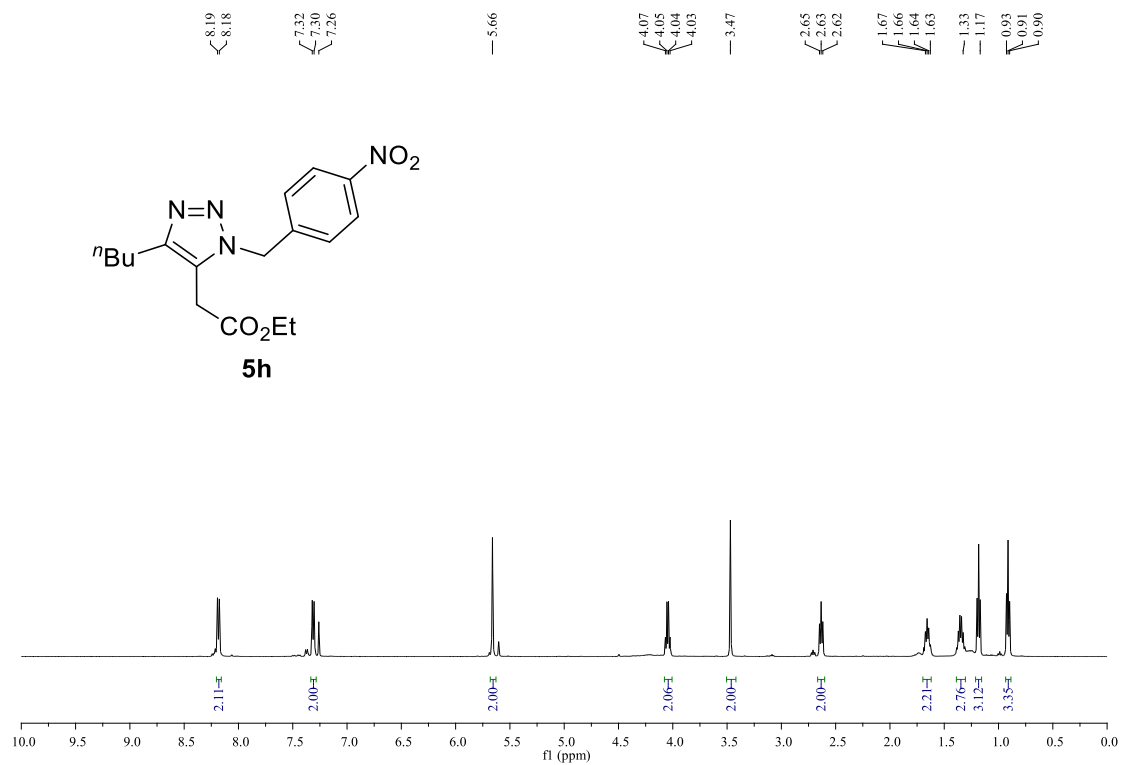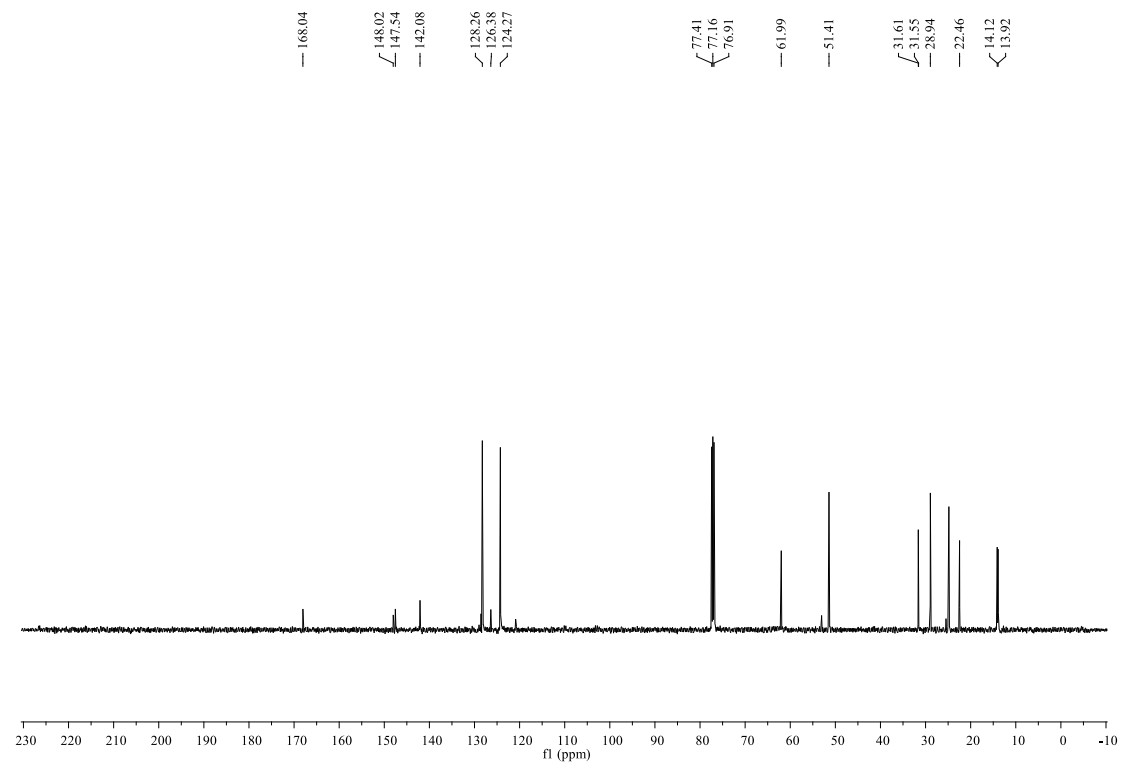



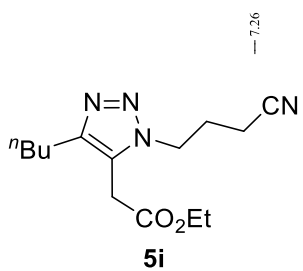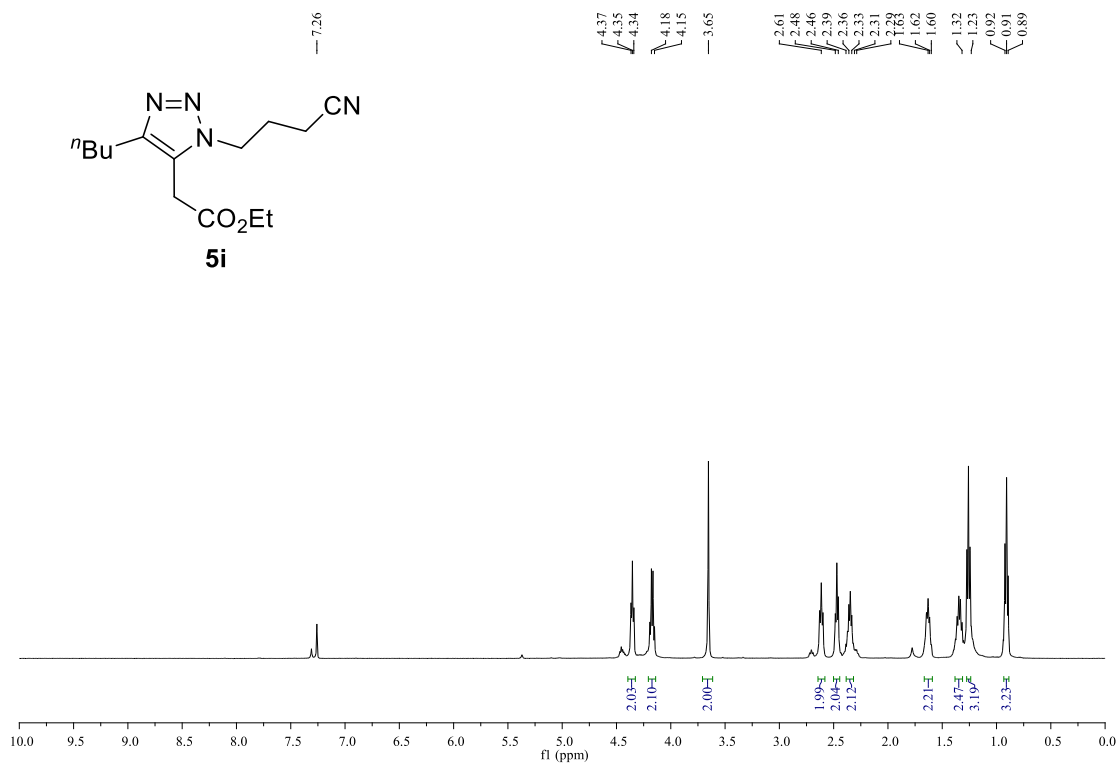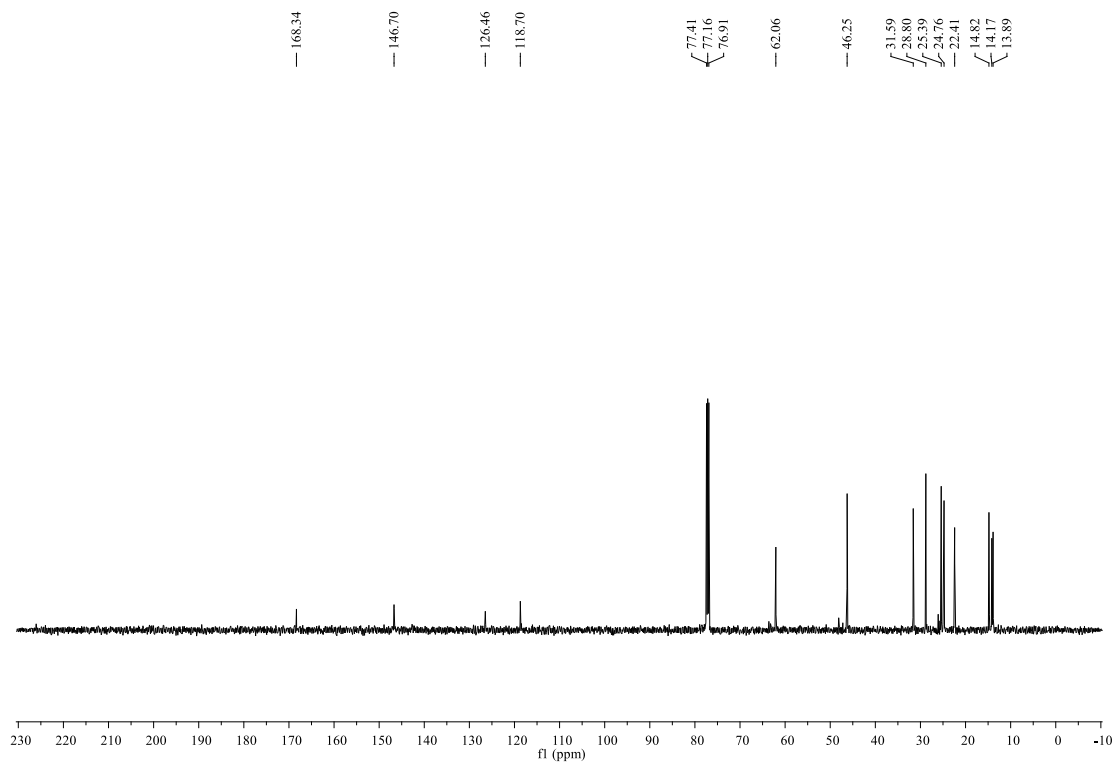

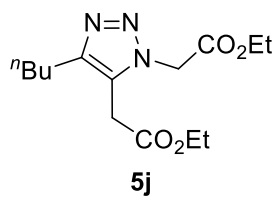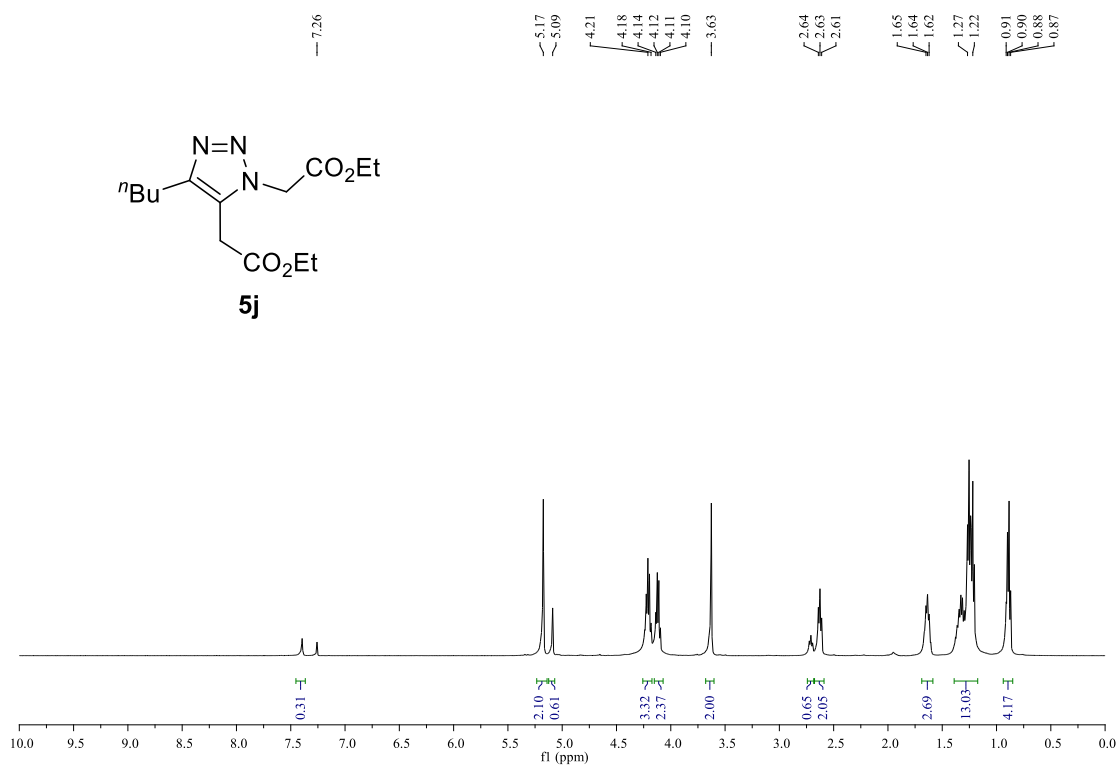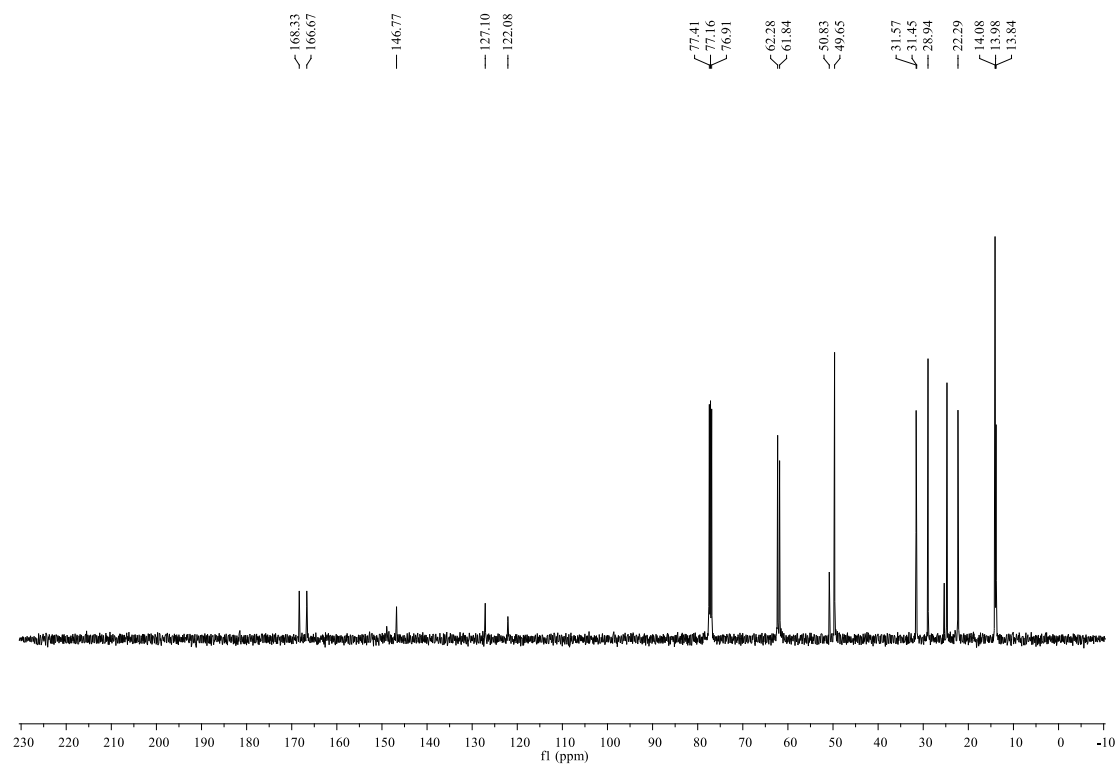

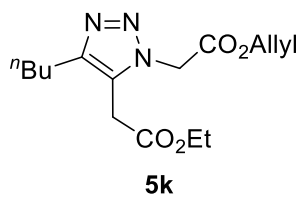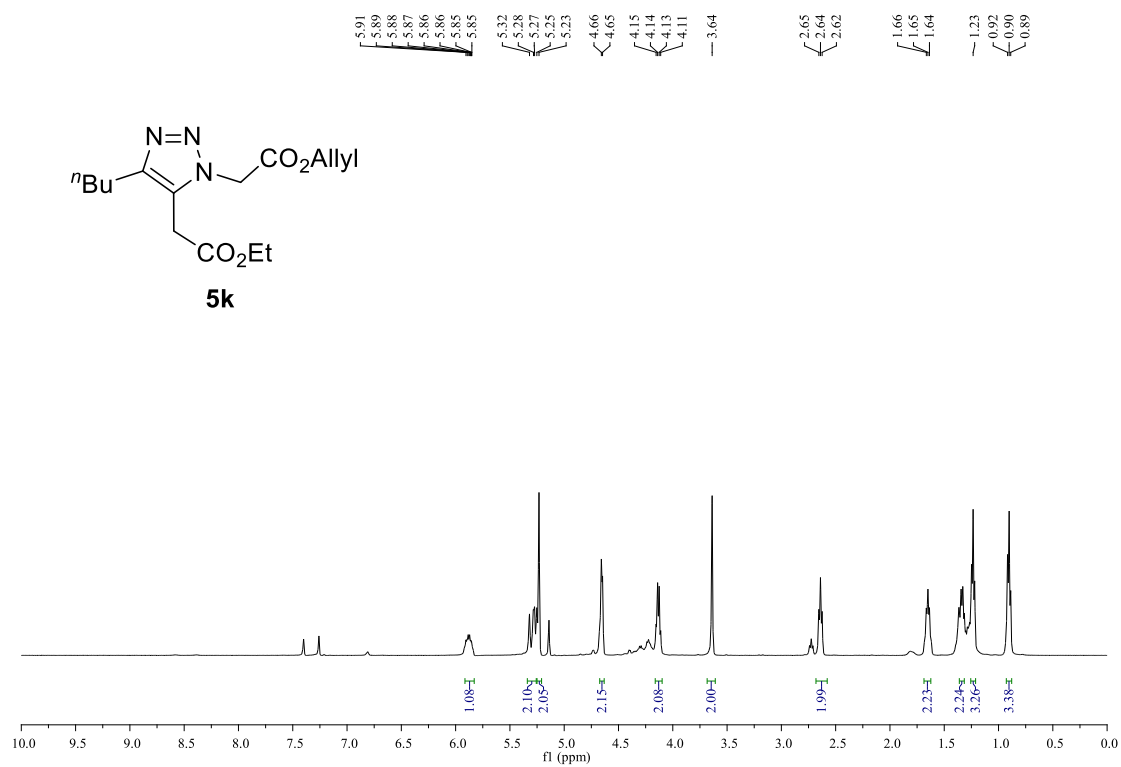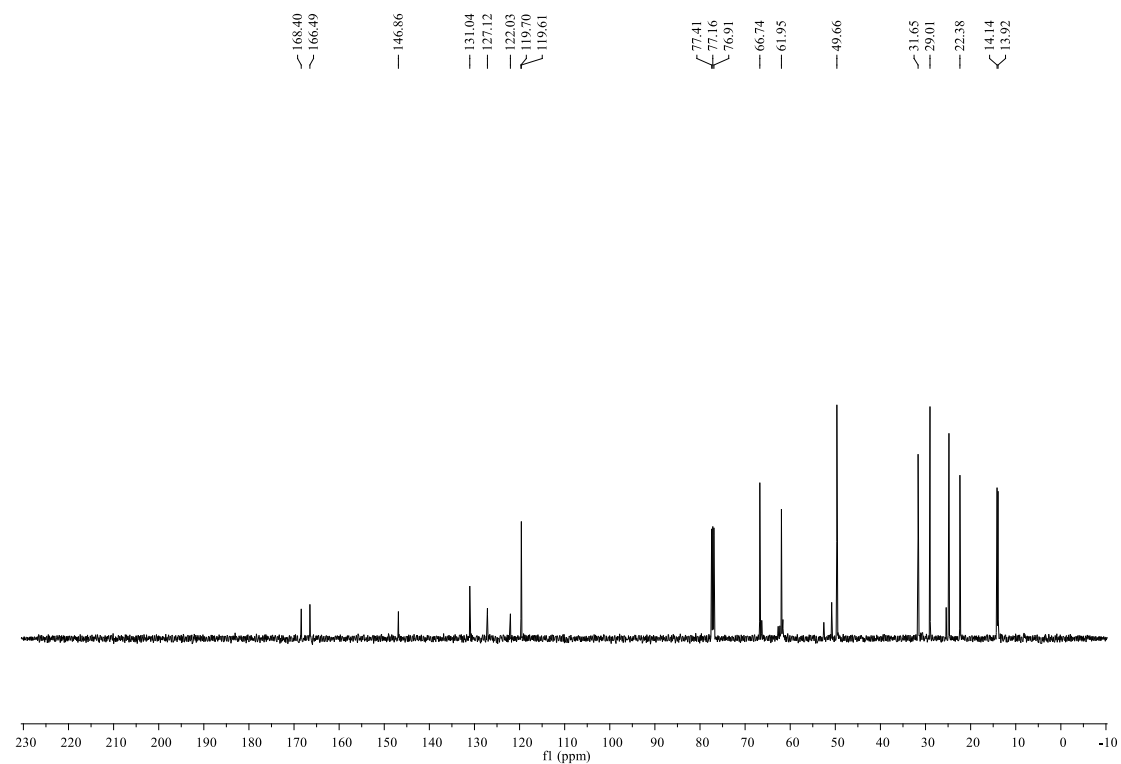

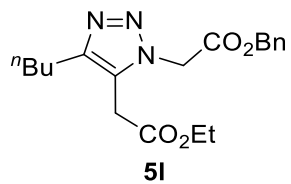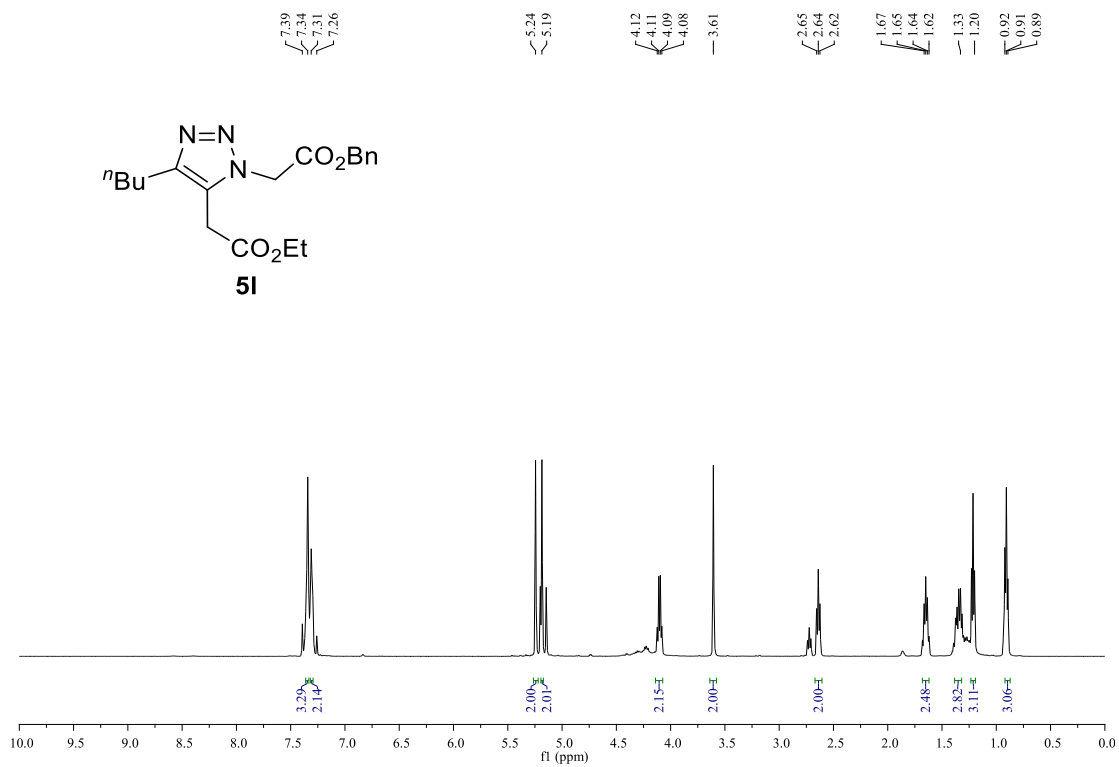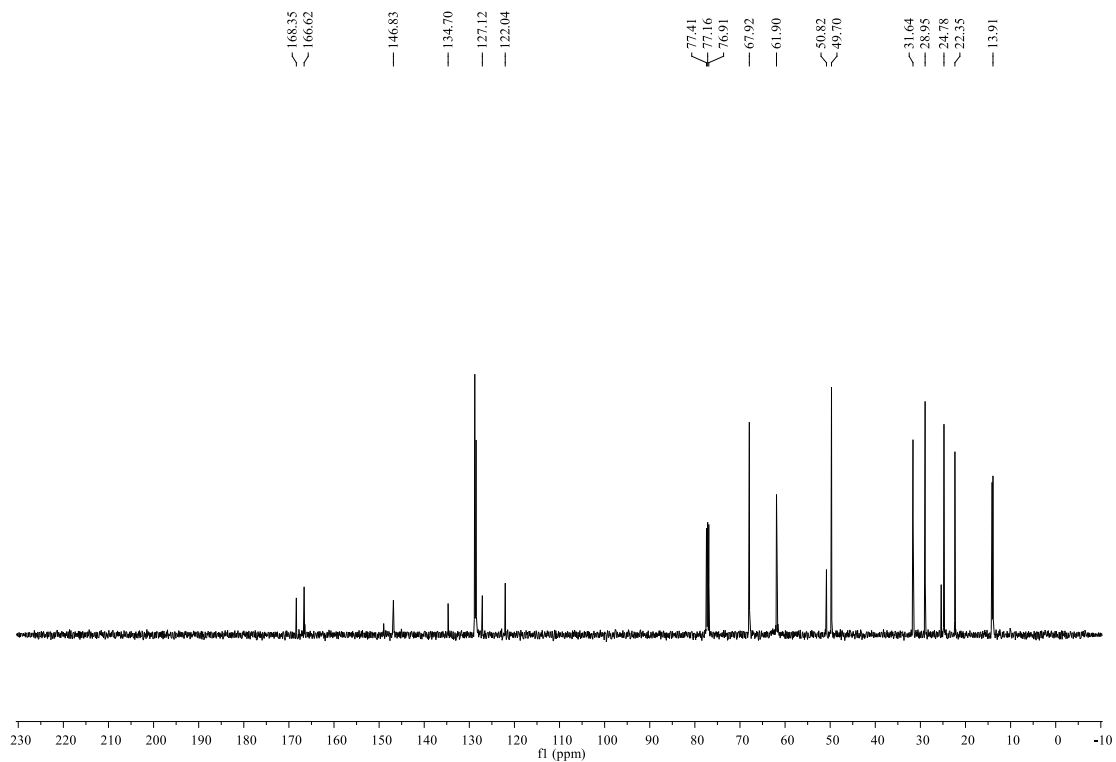

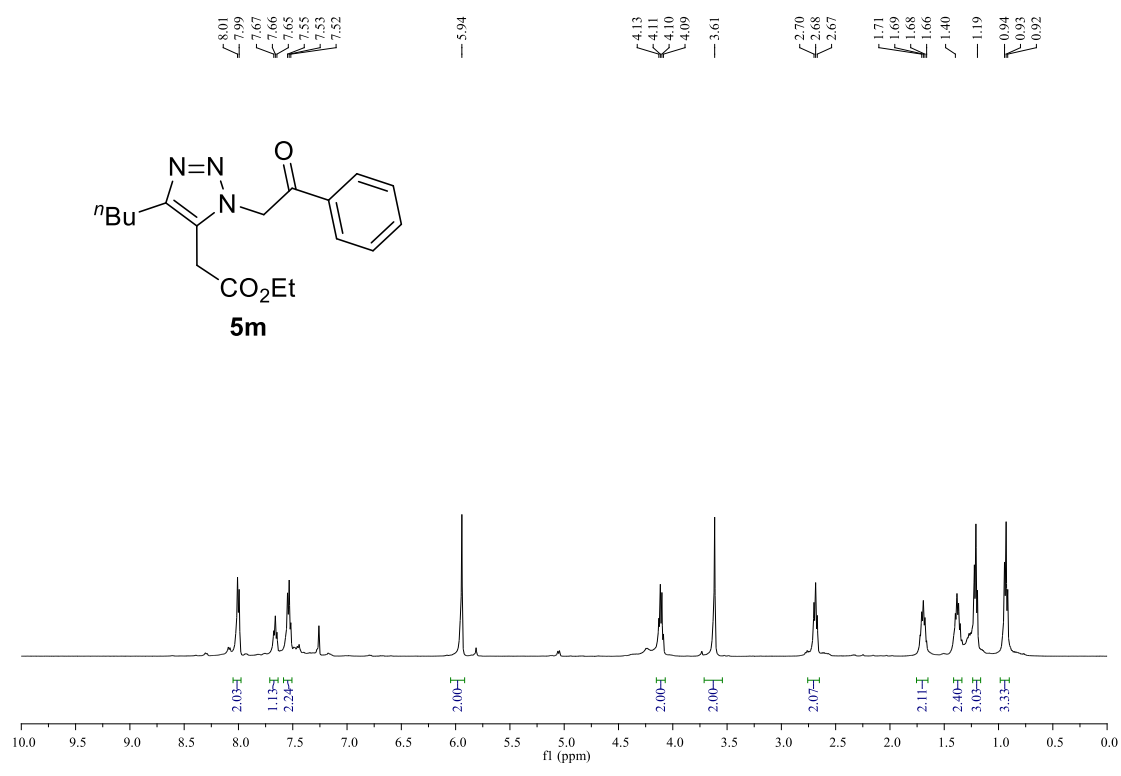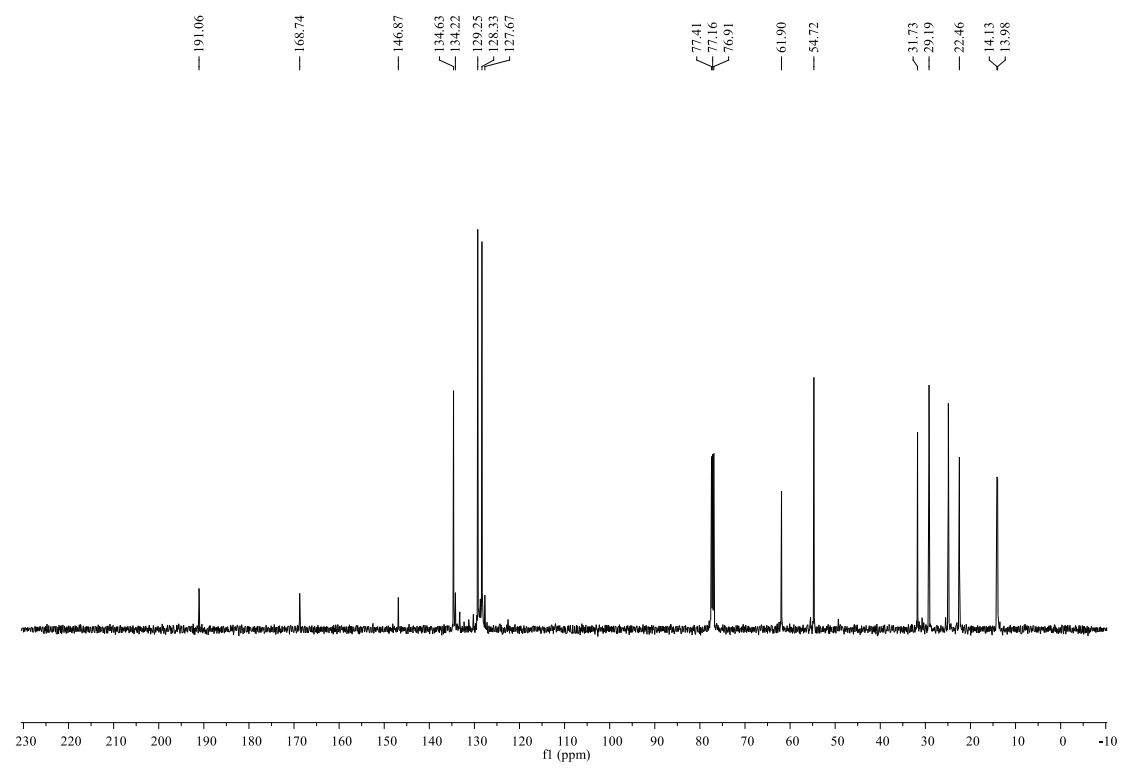

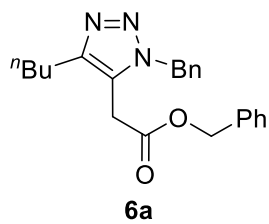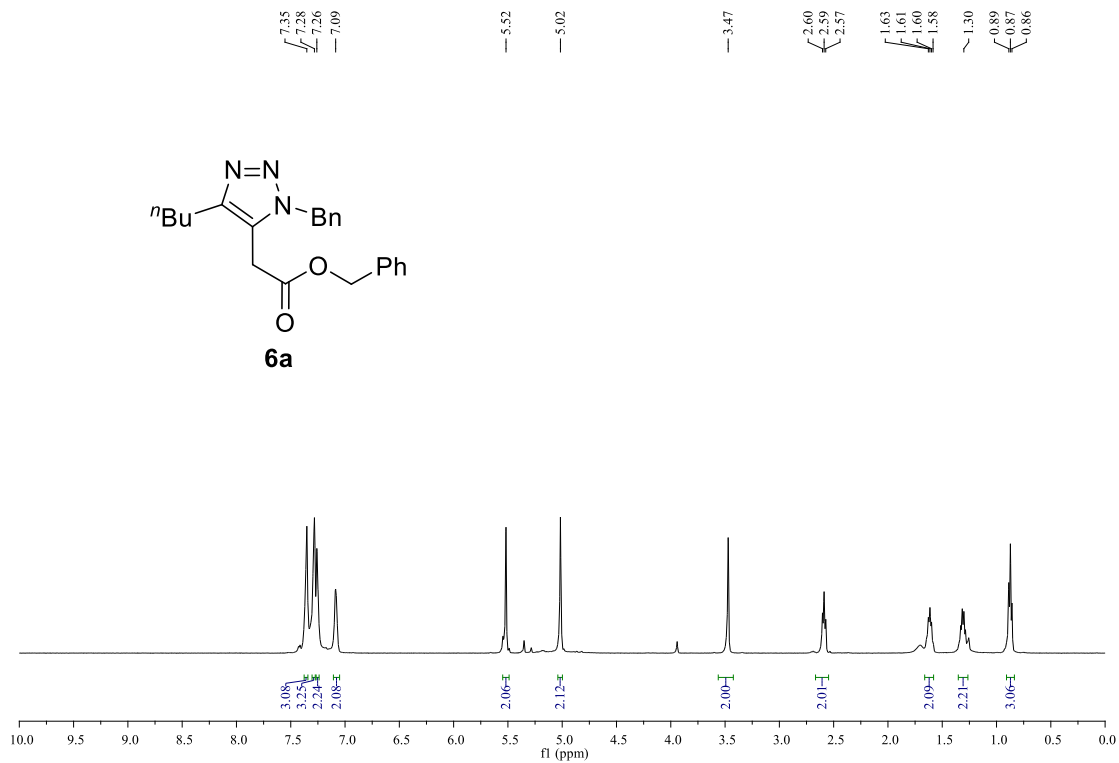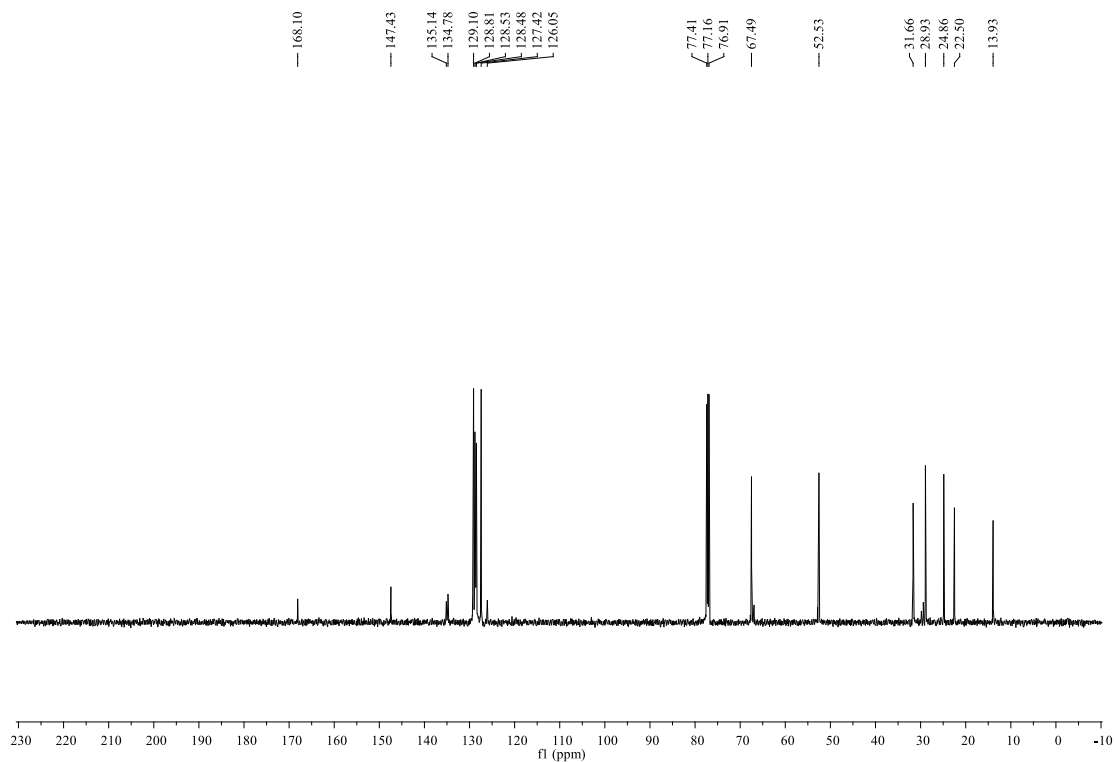

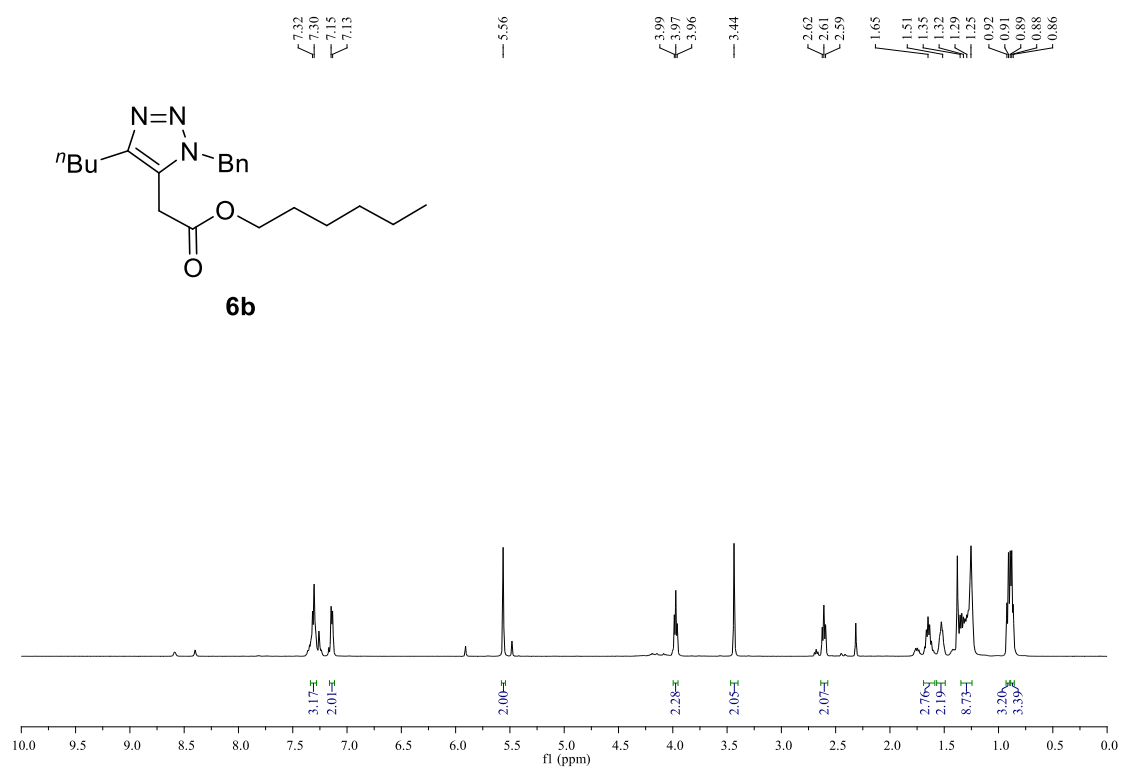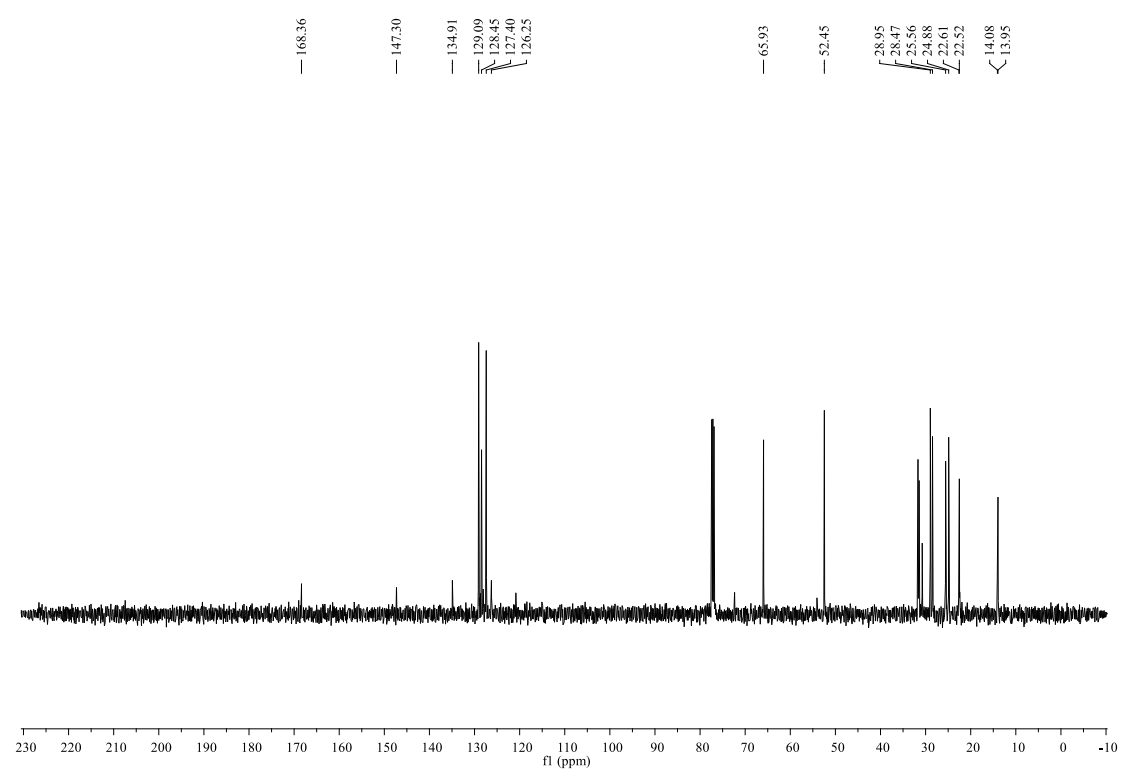

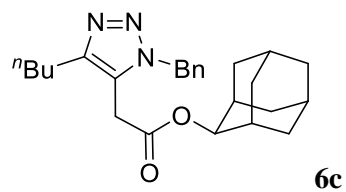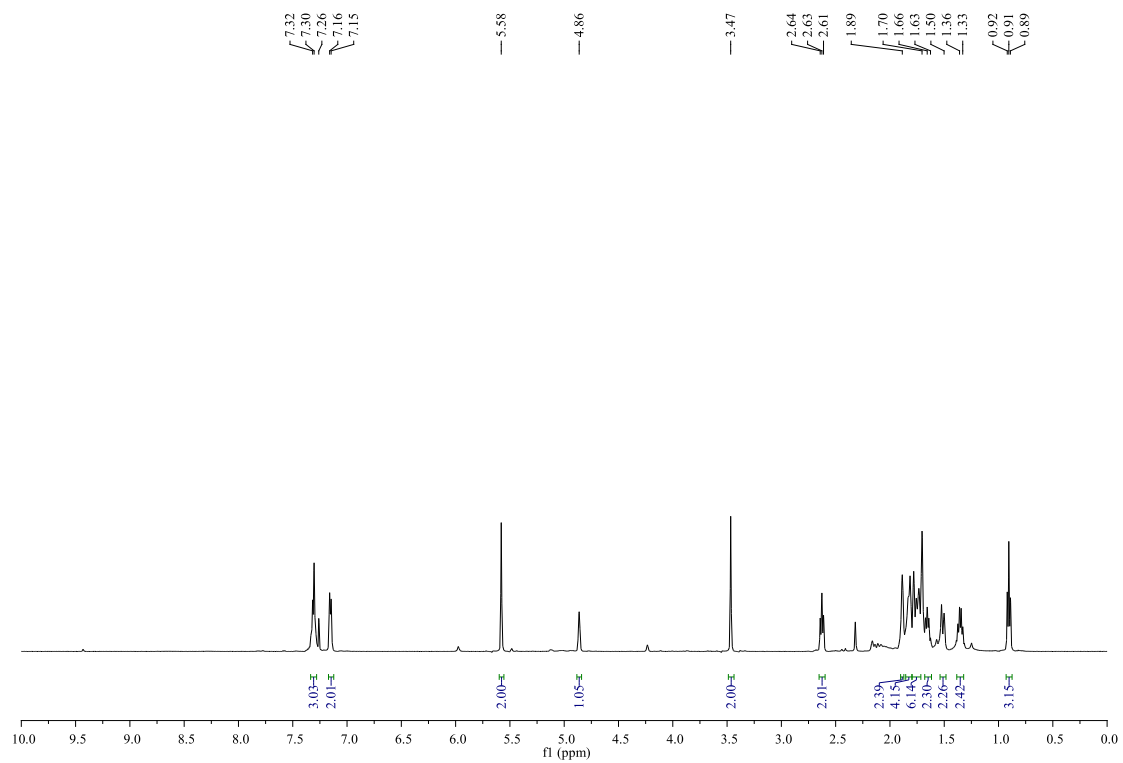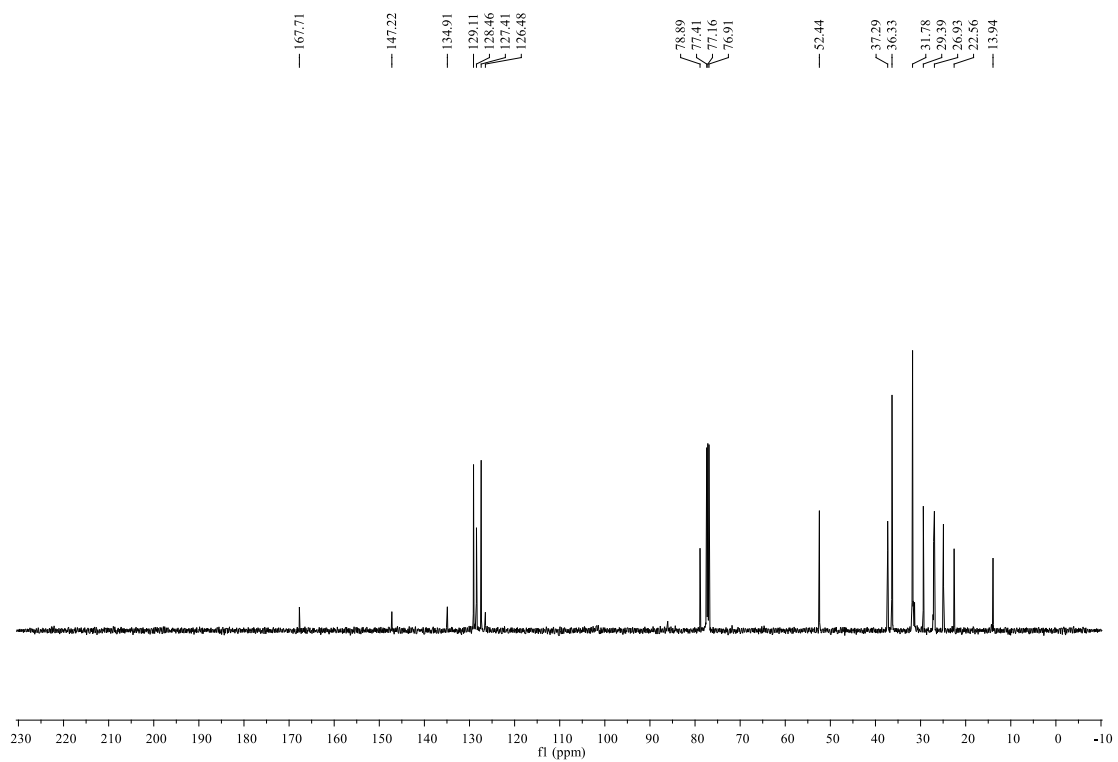



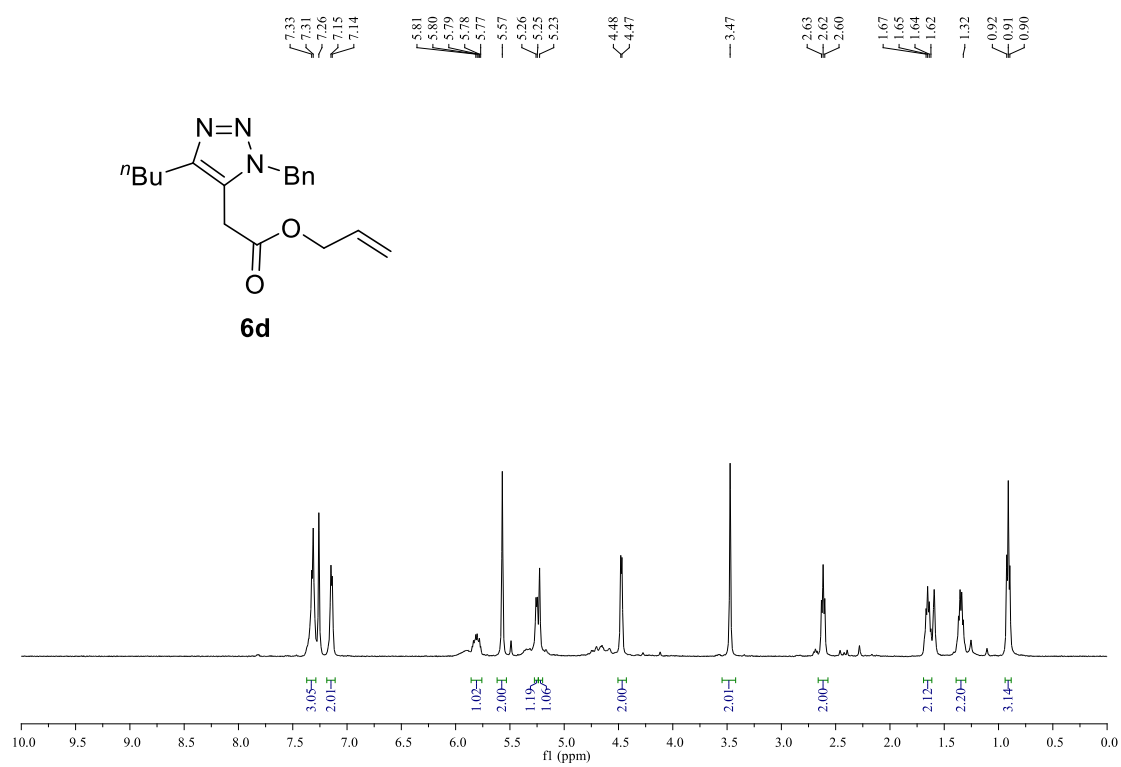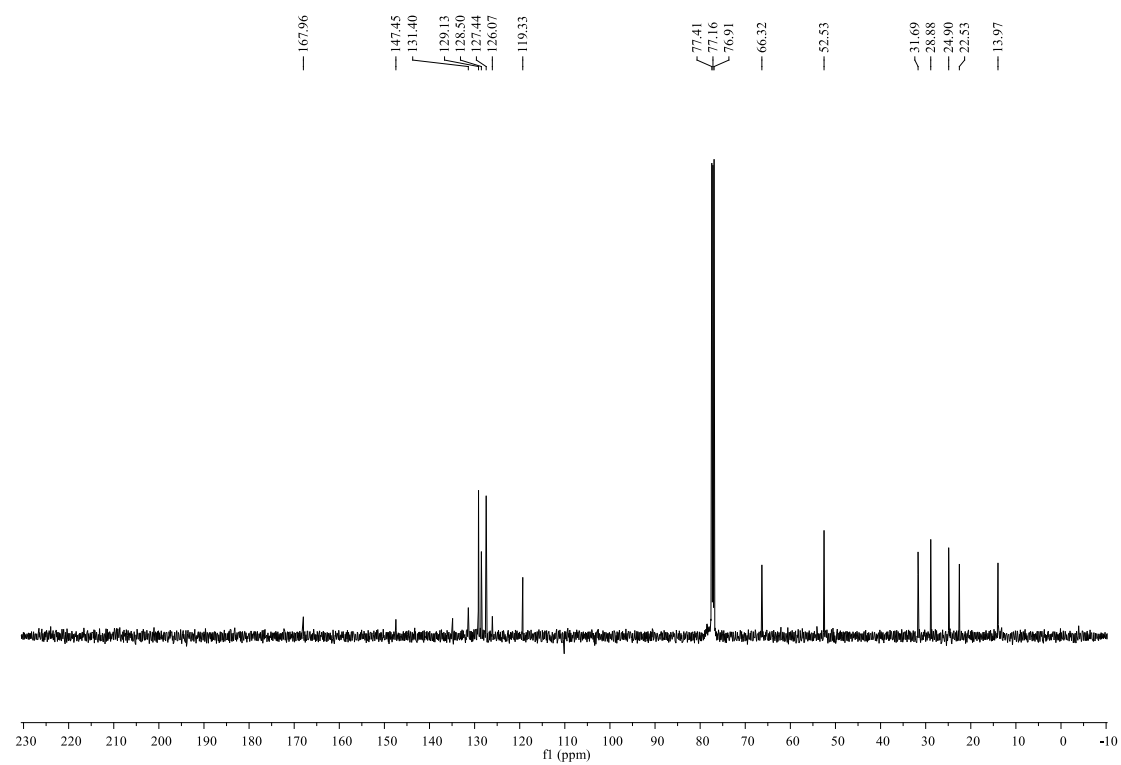

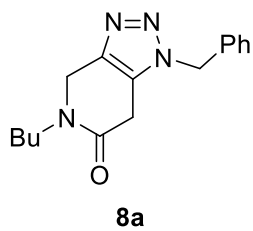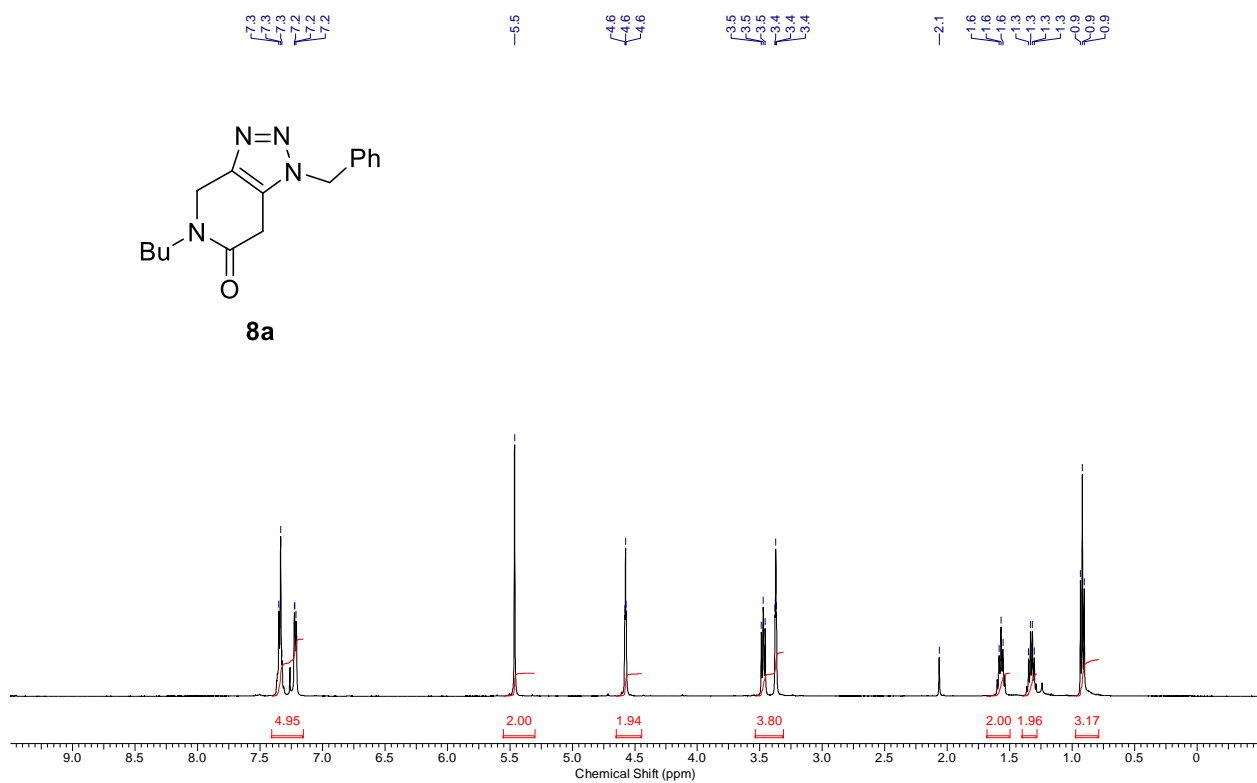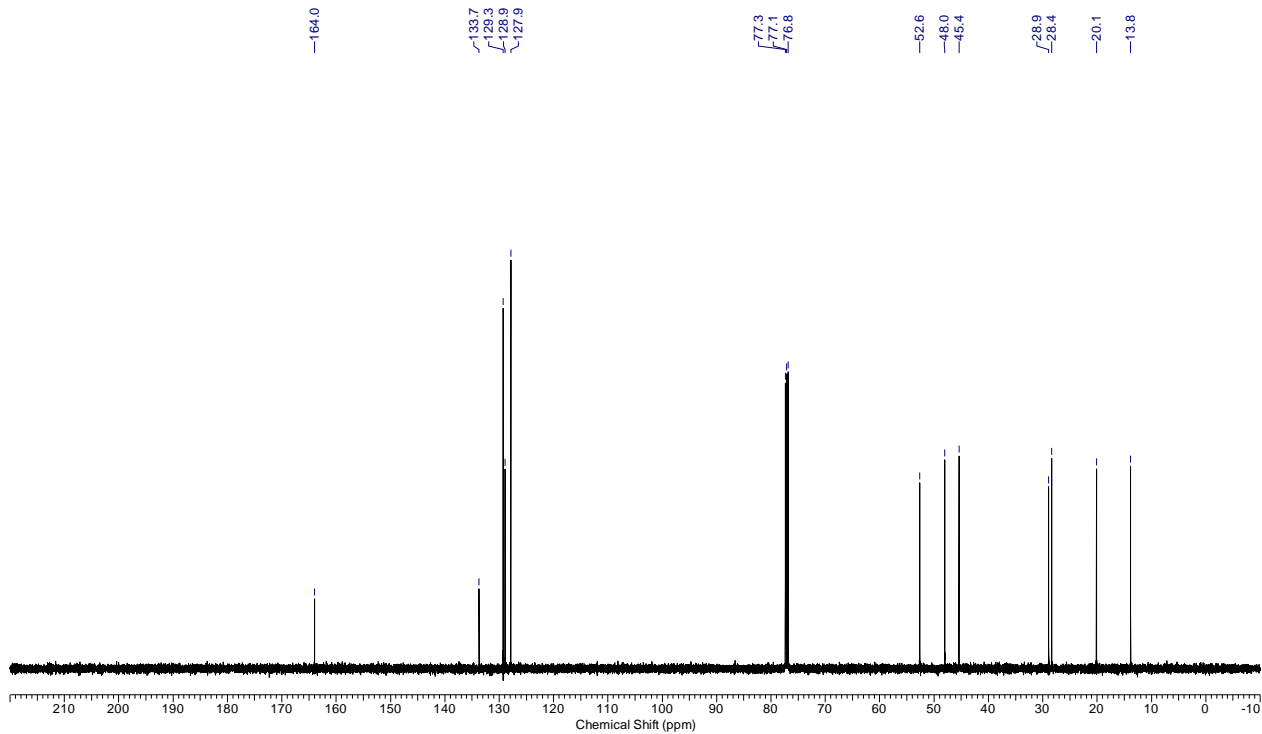

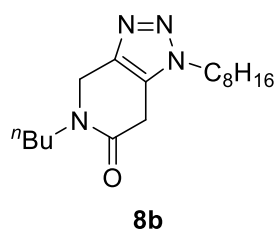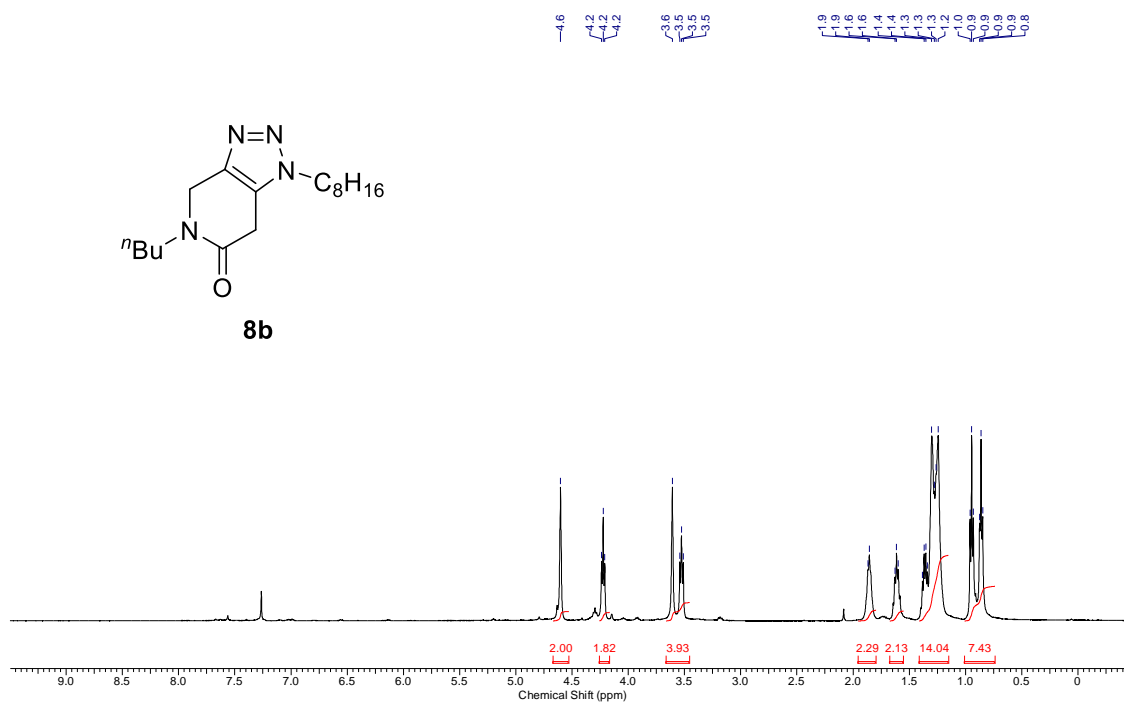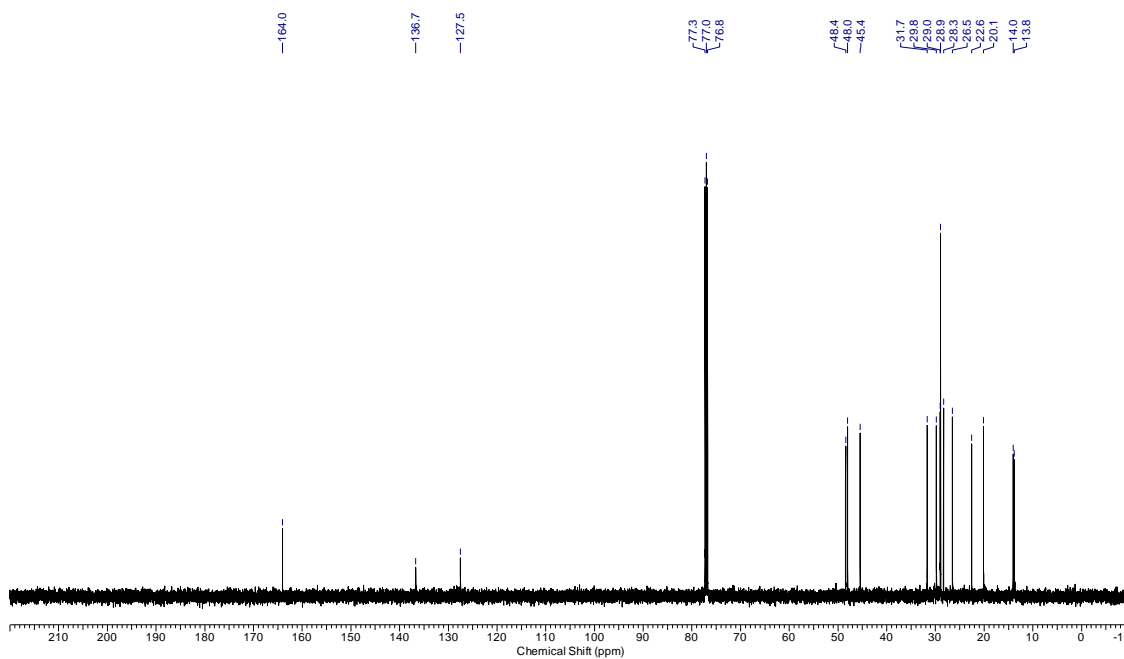

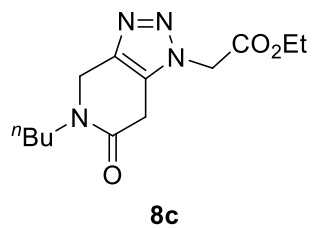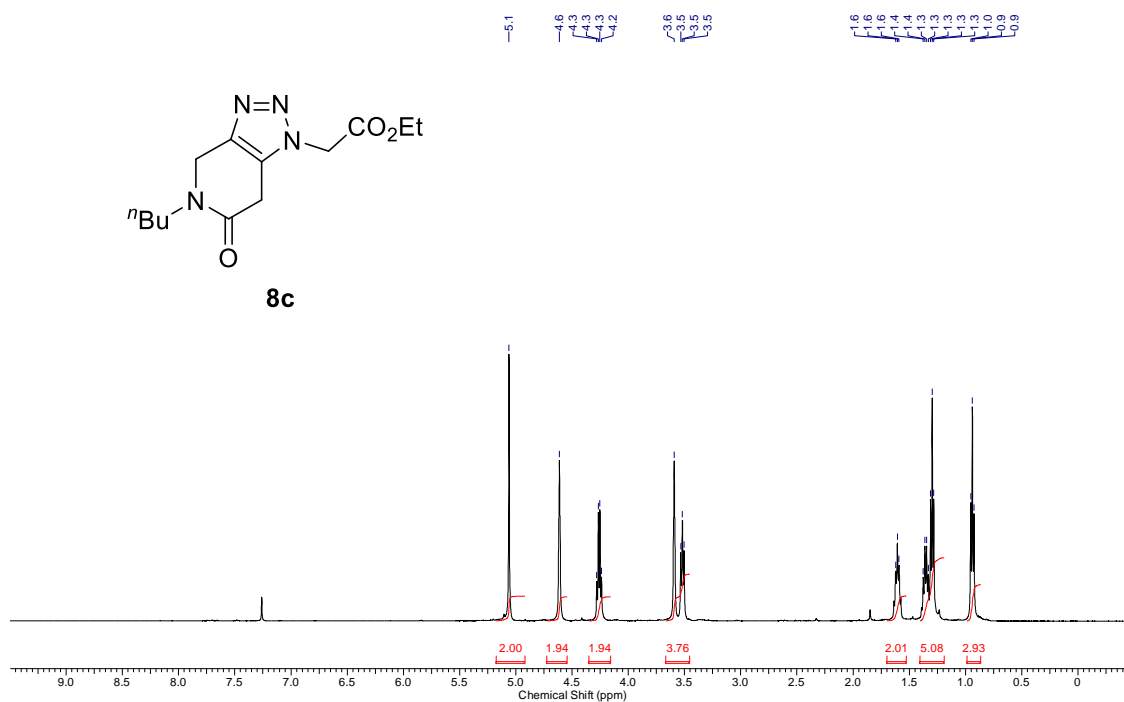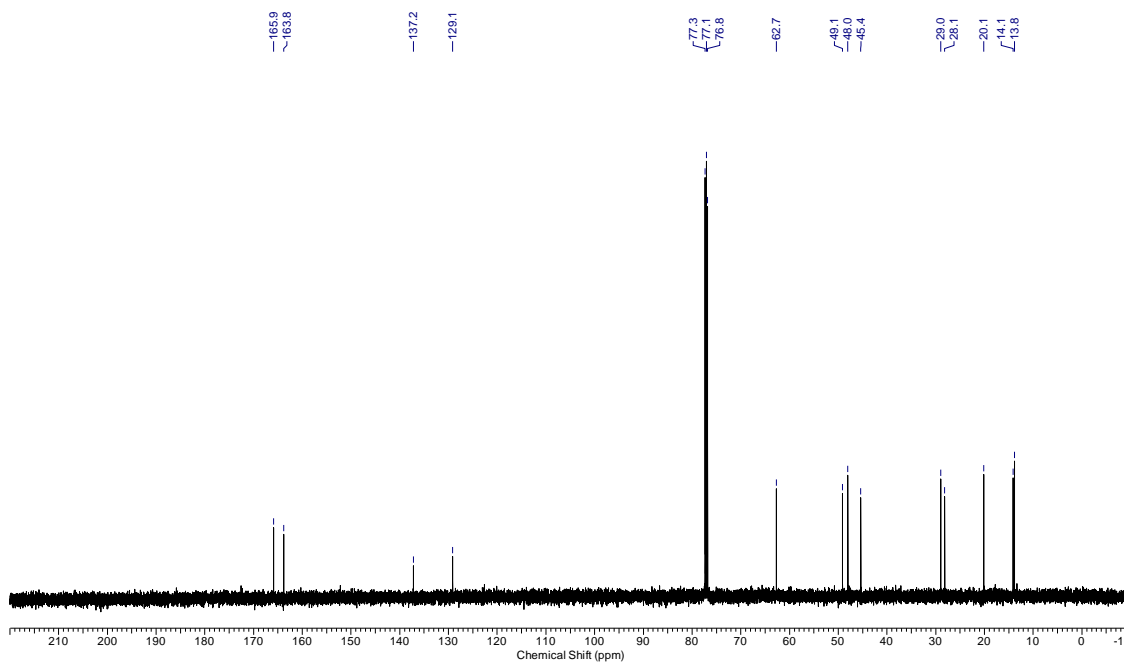

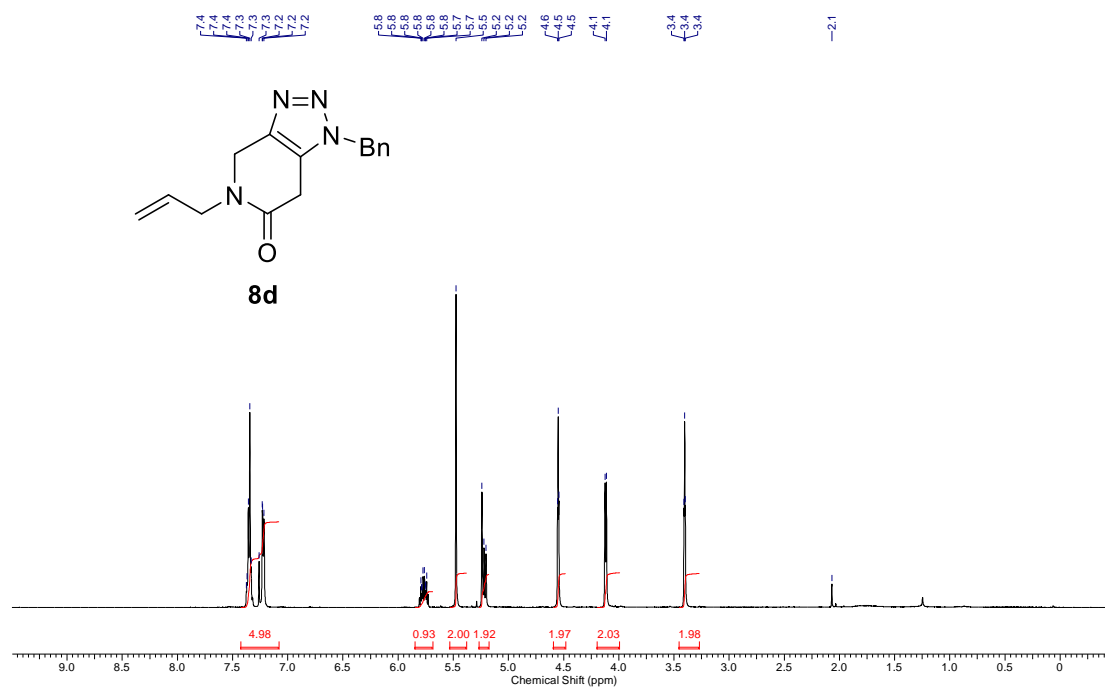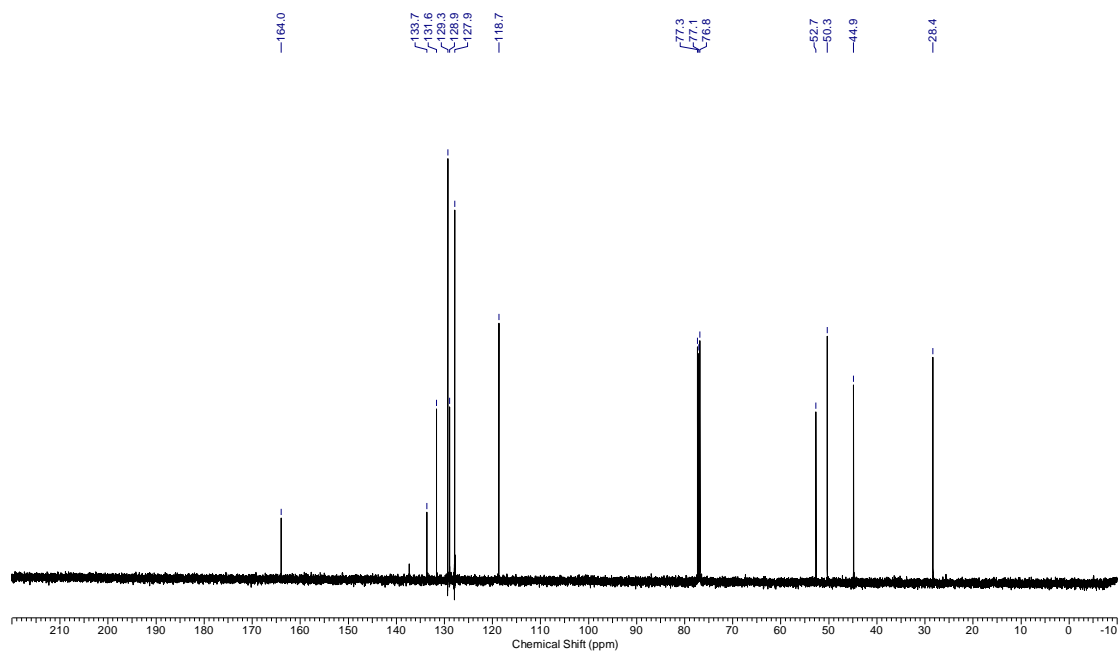

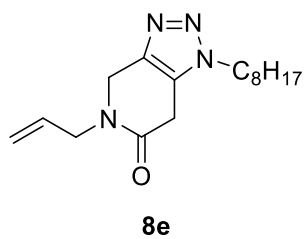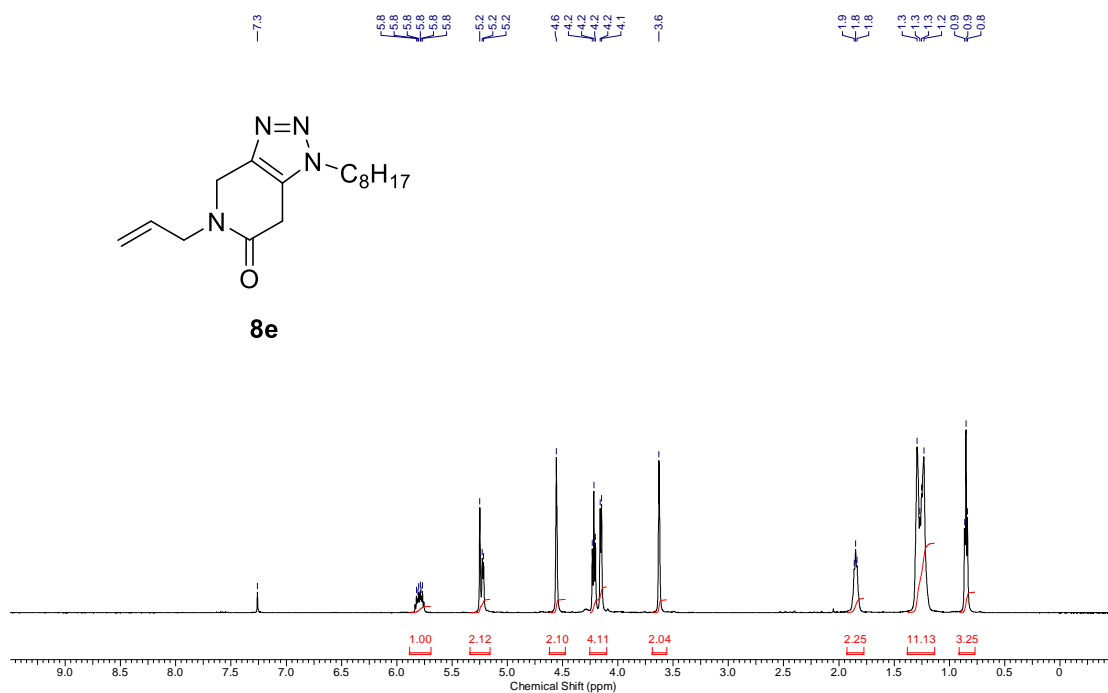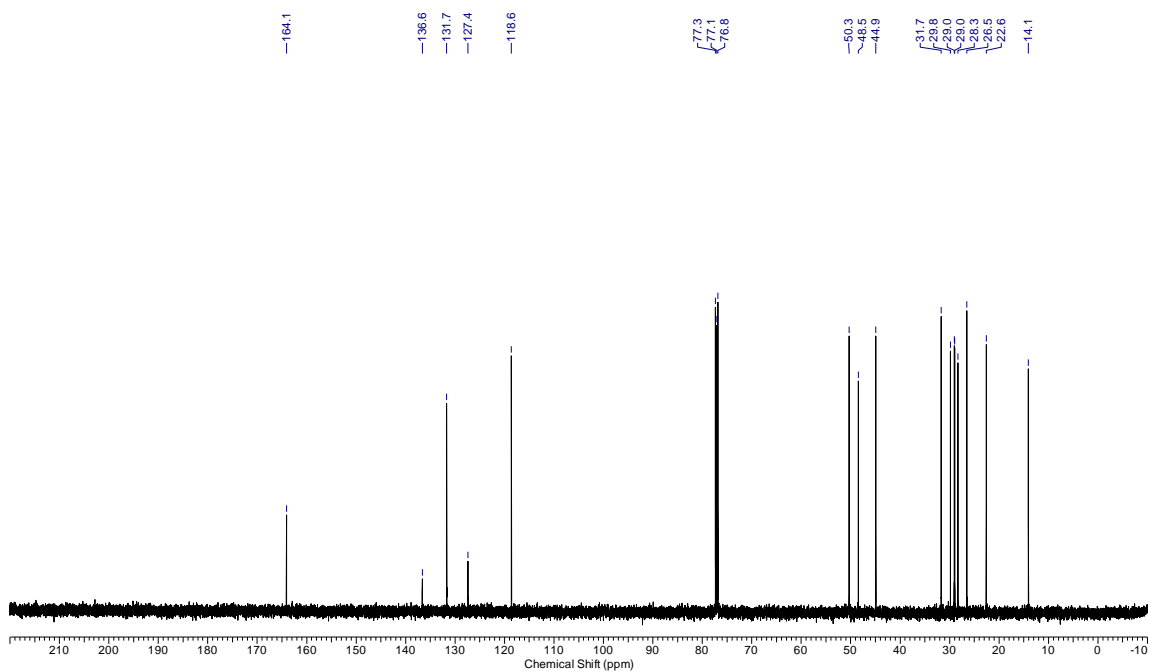

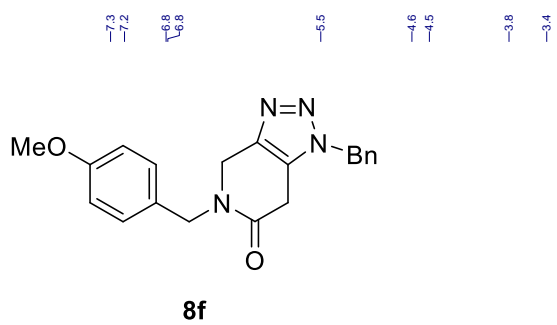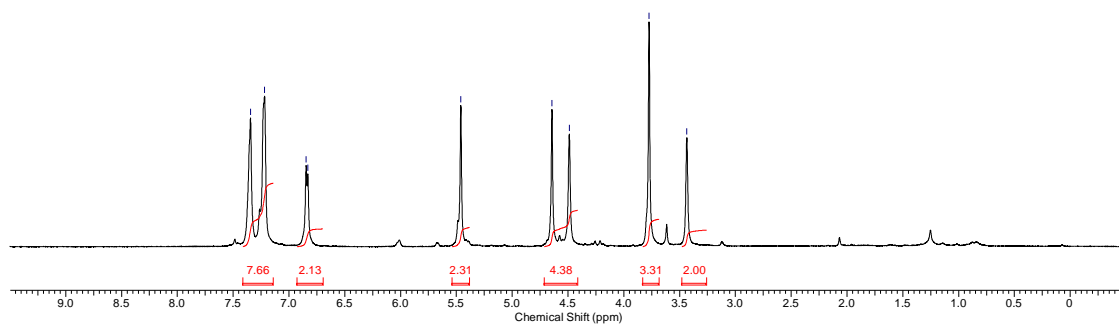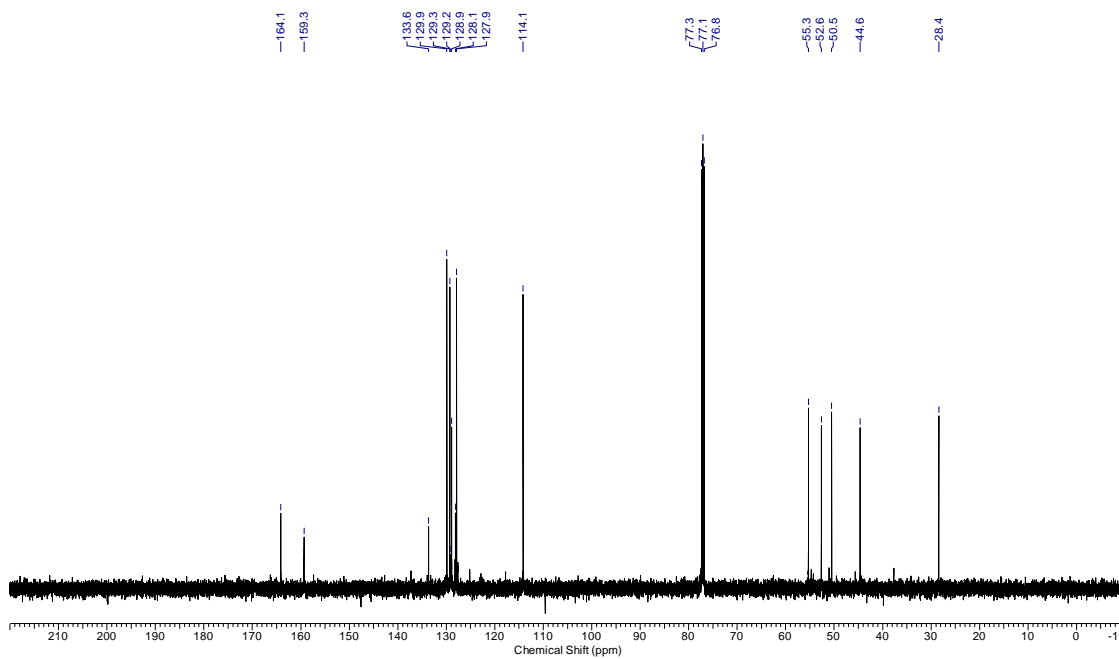

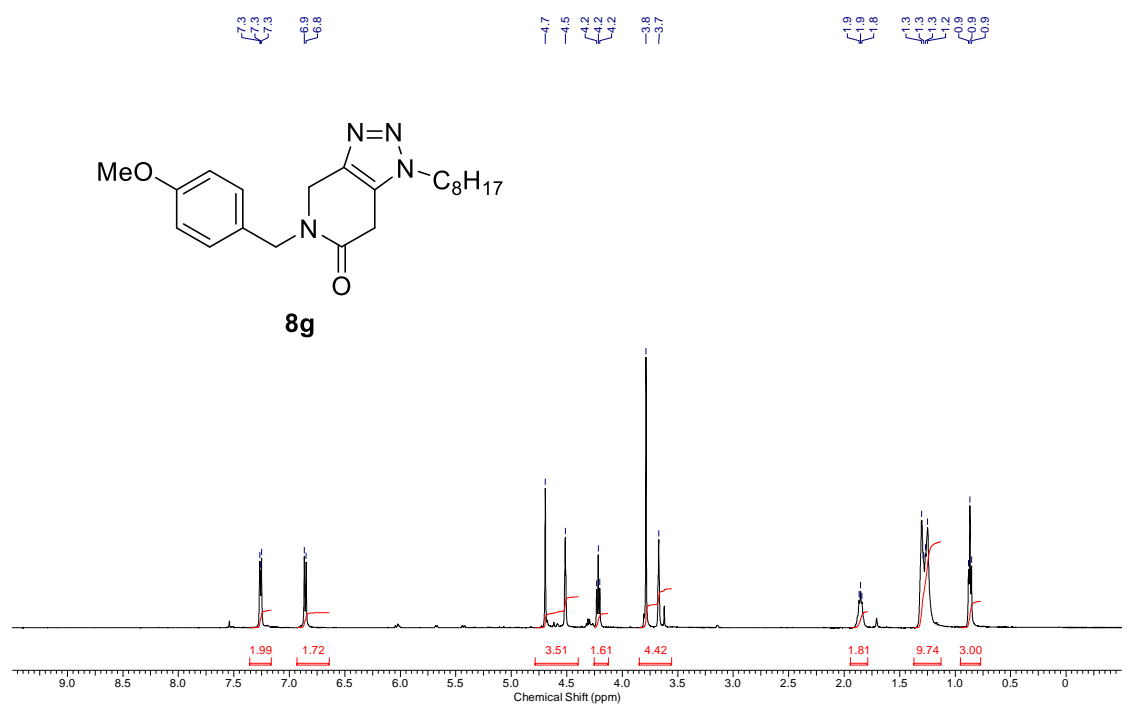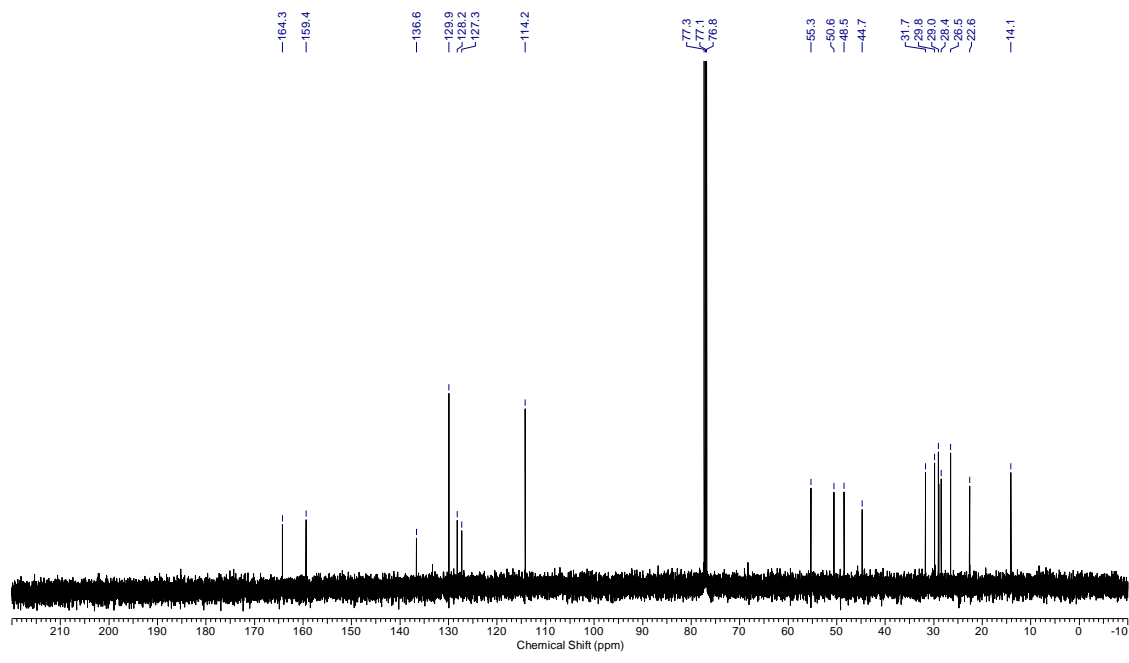



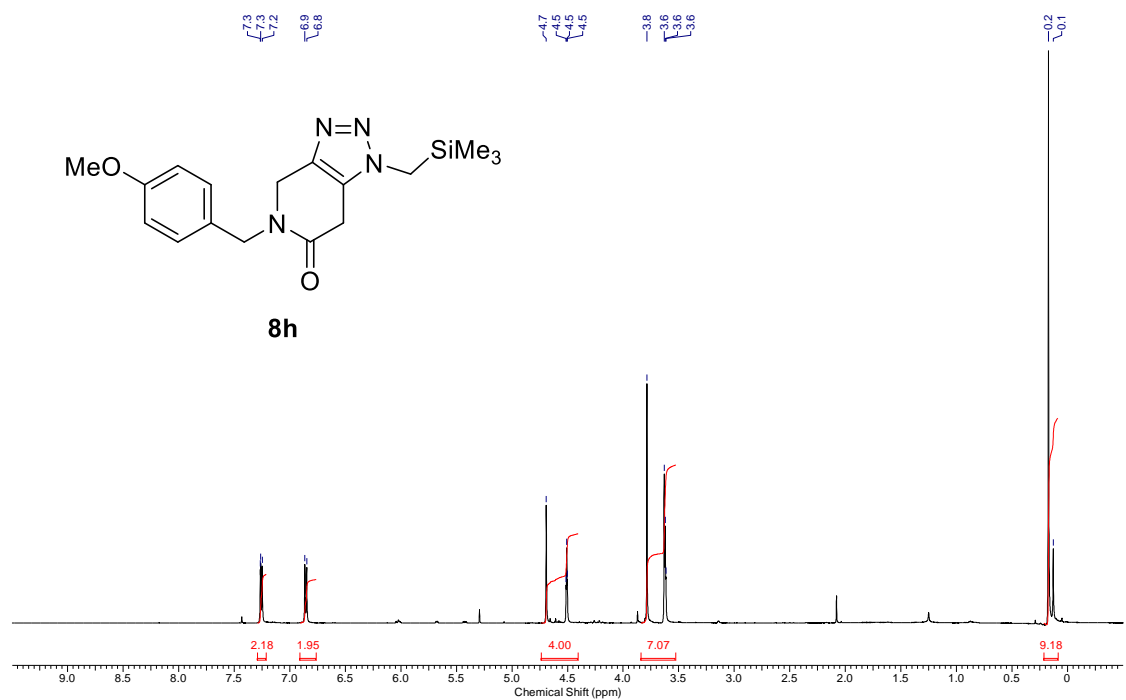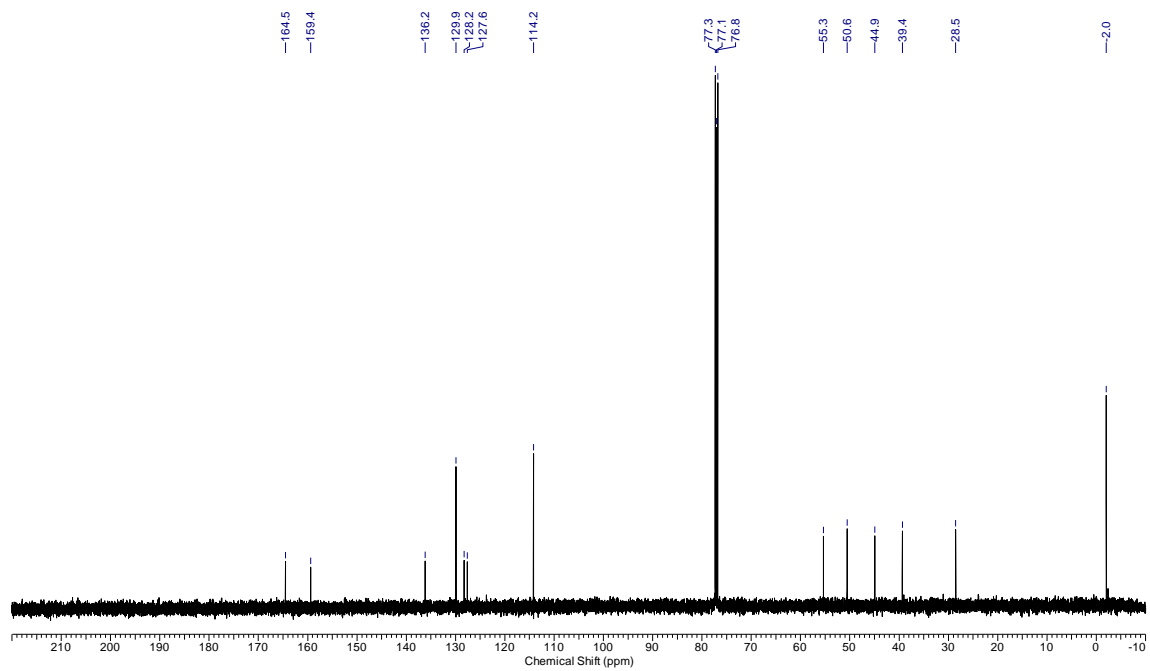

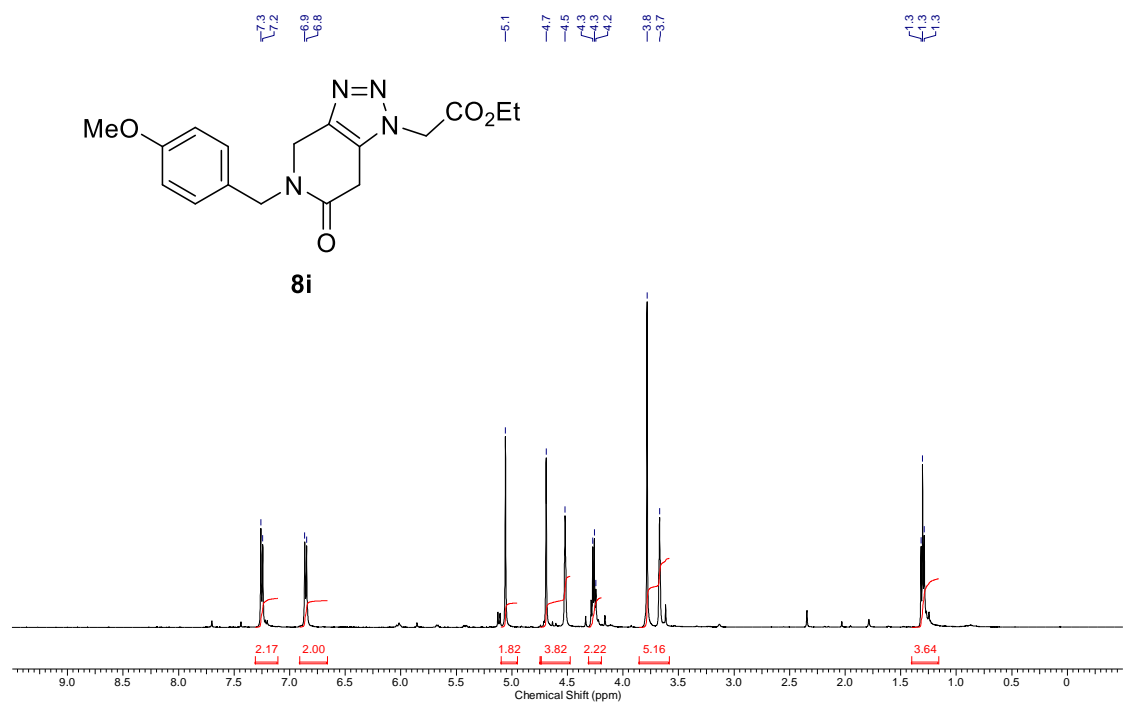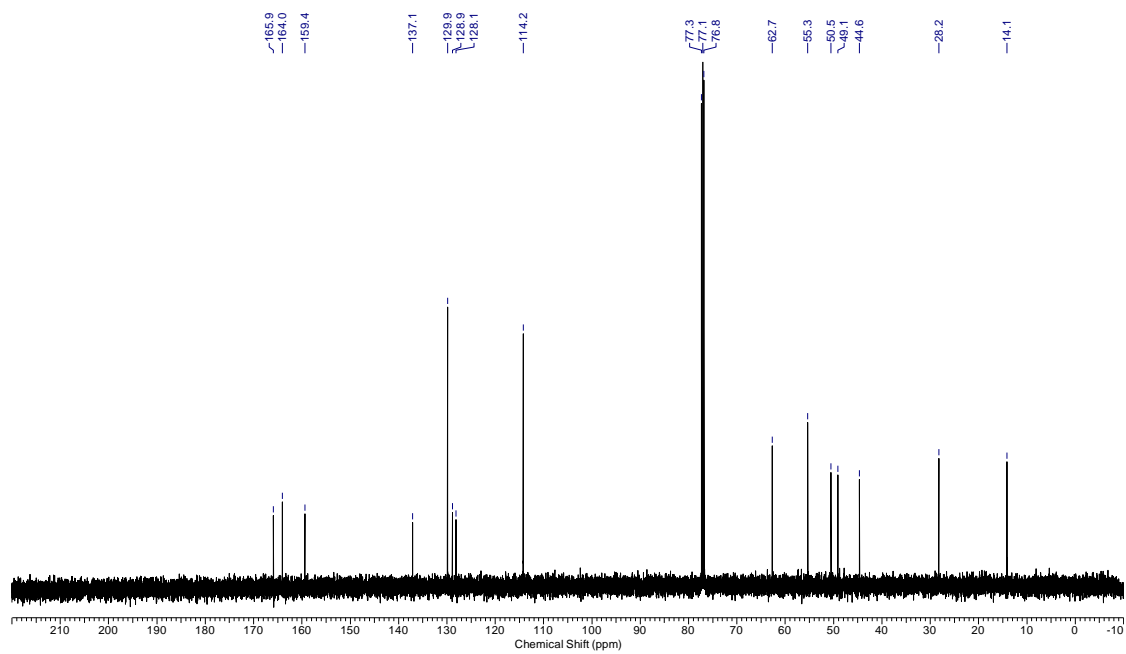

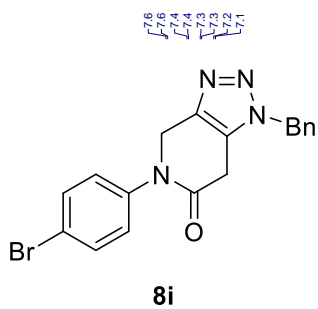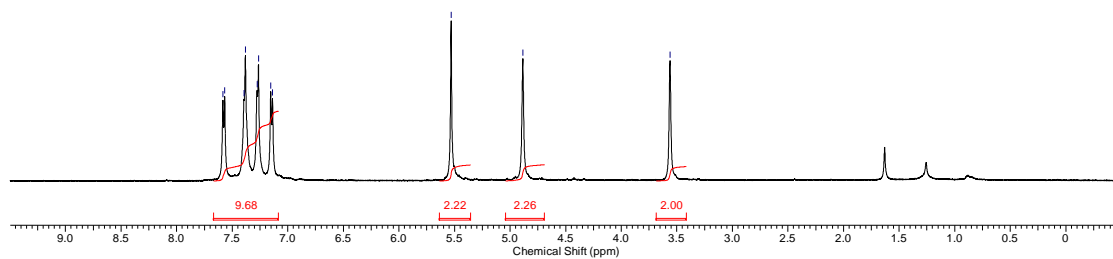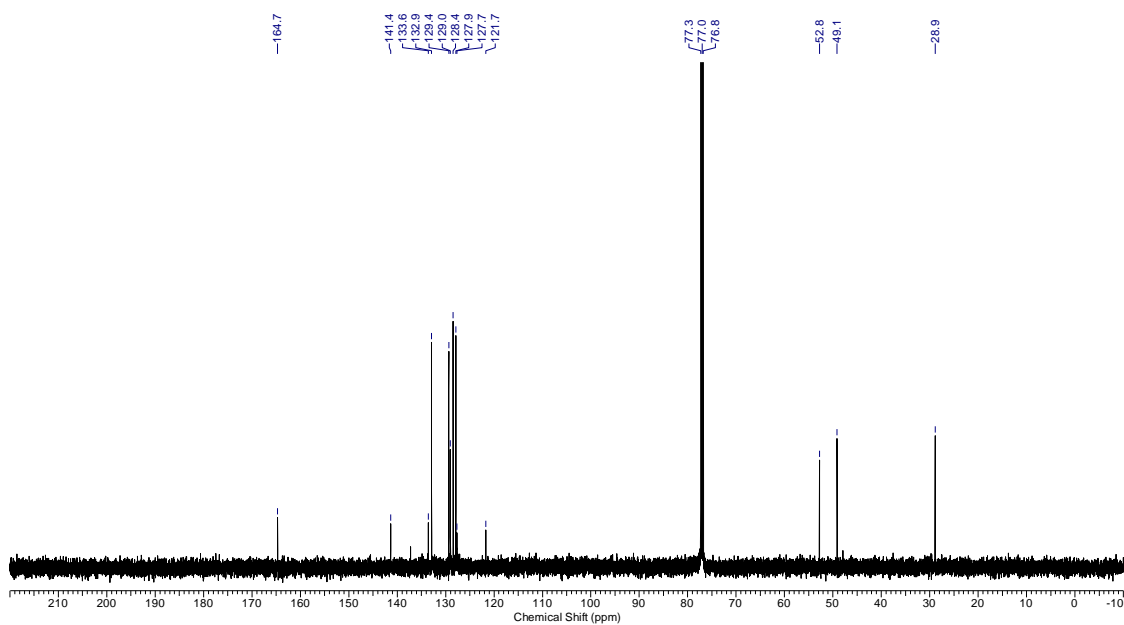

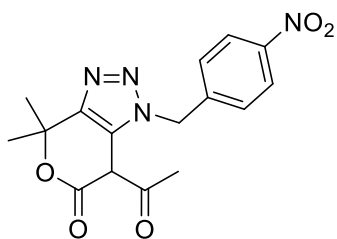

**8k**

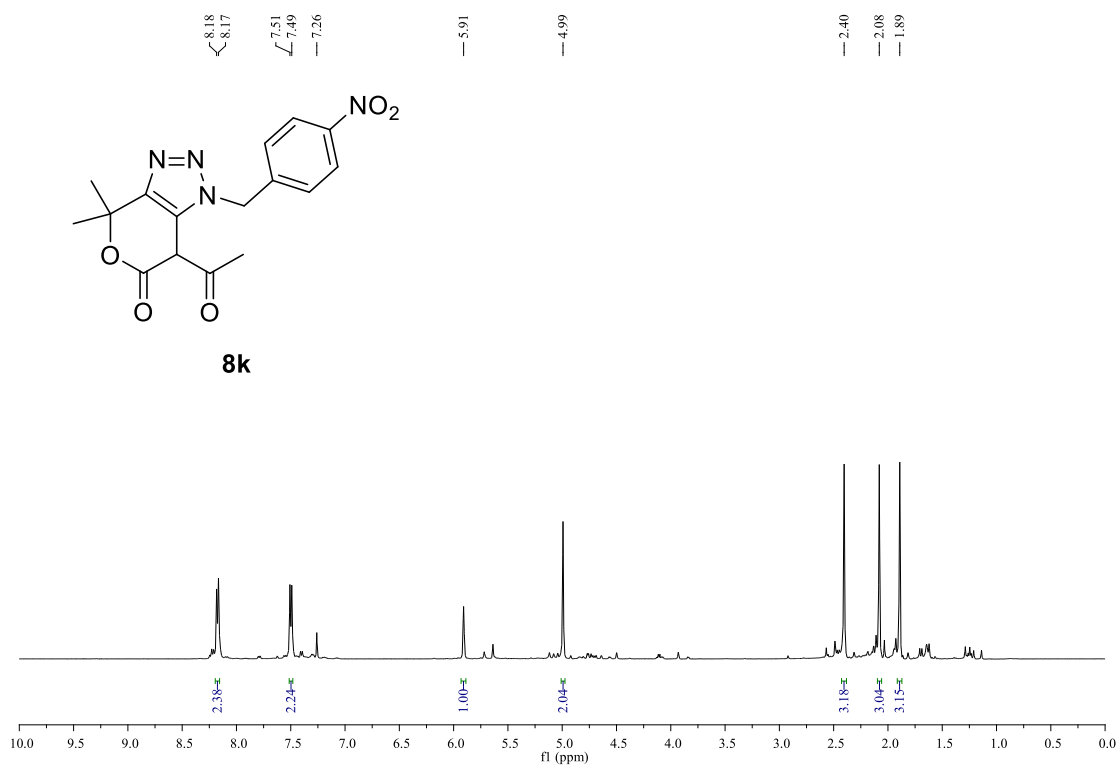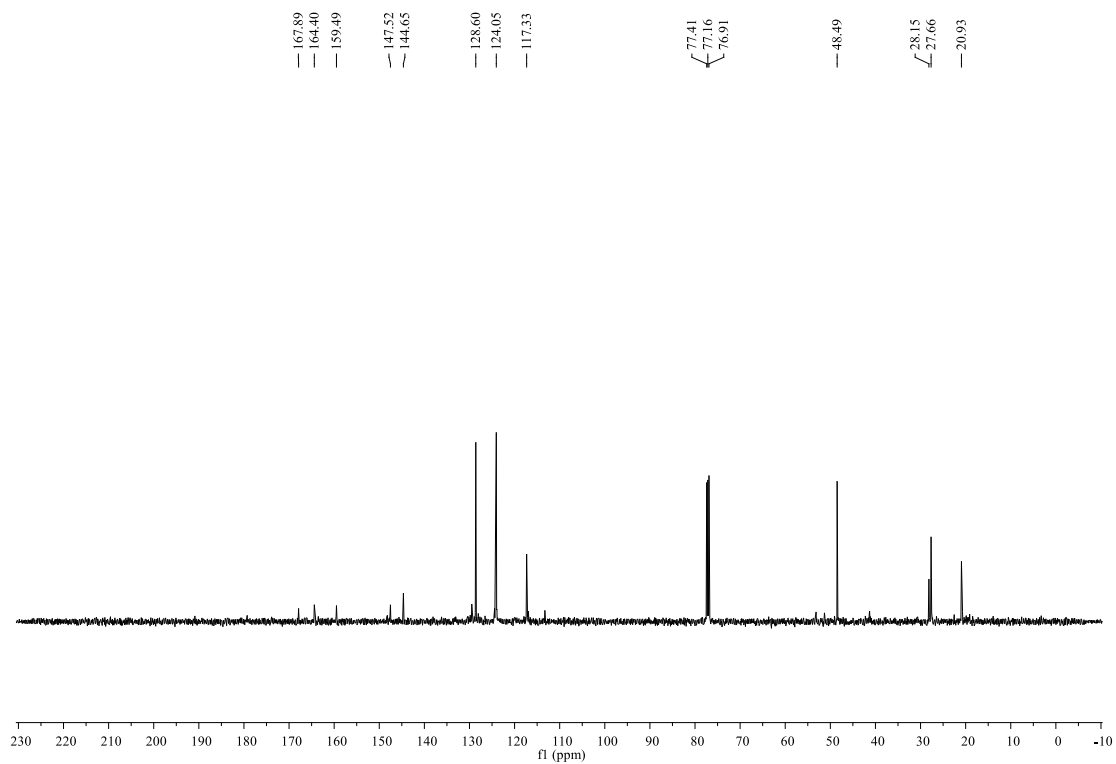

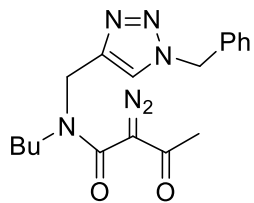

81'

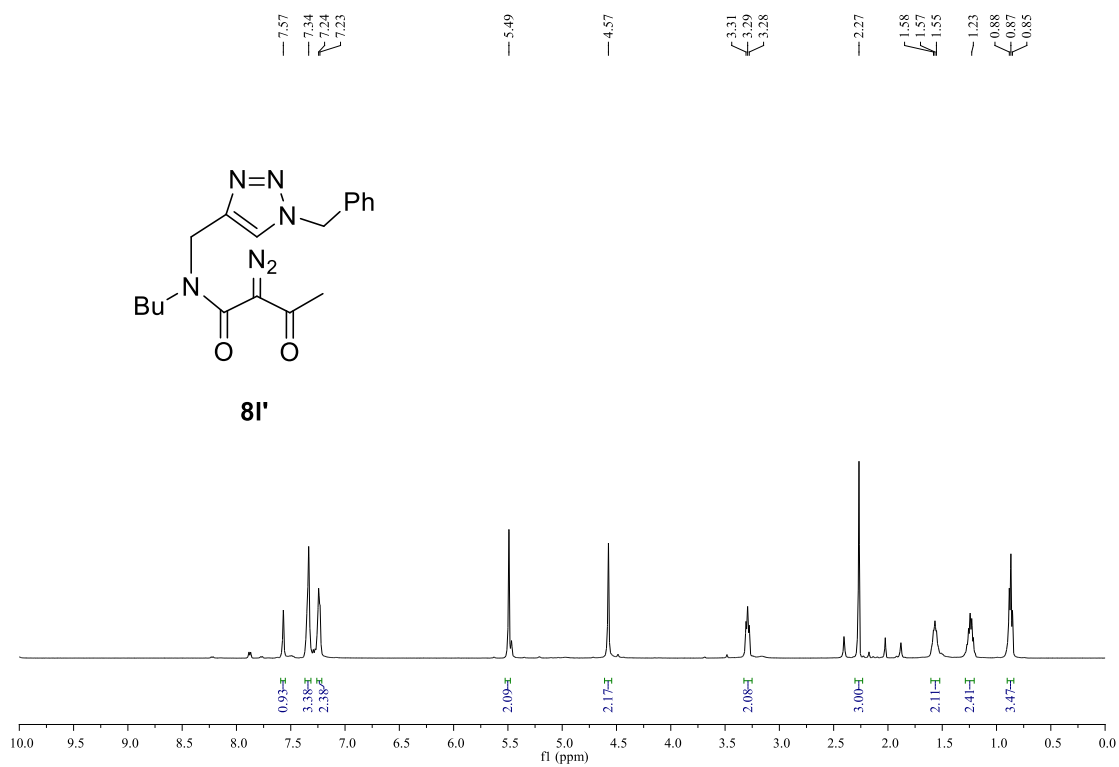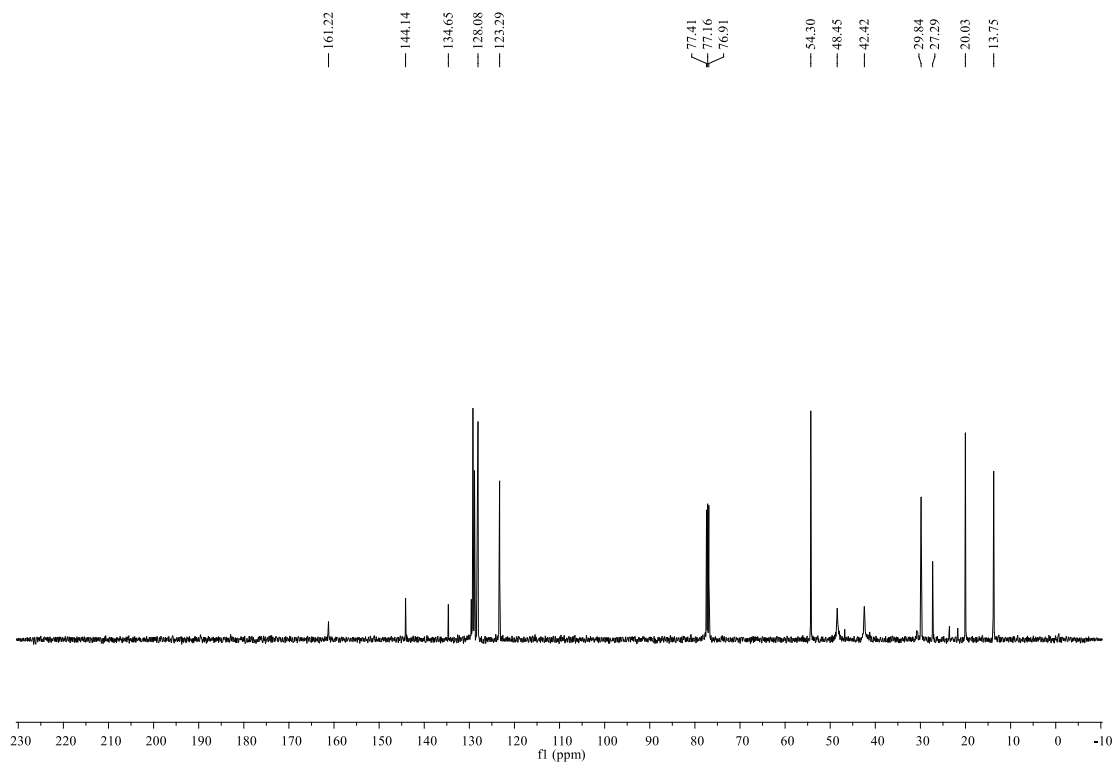

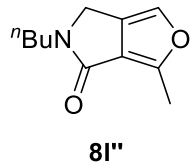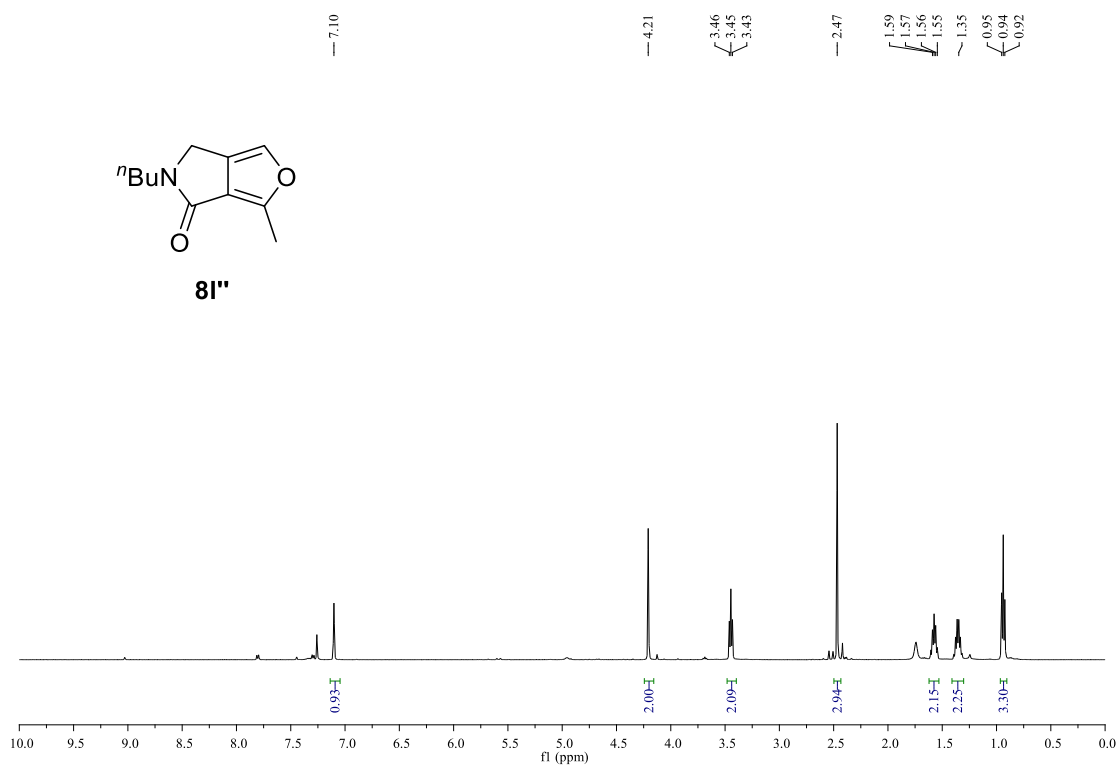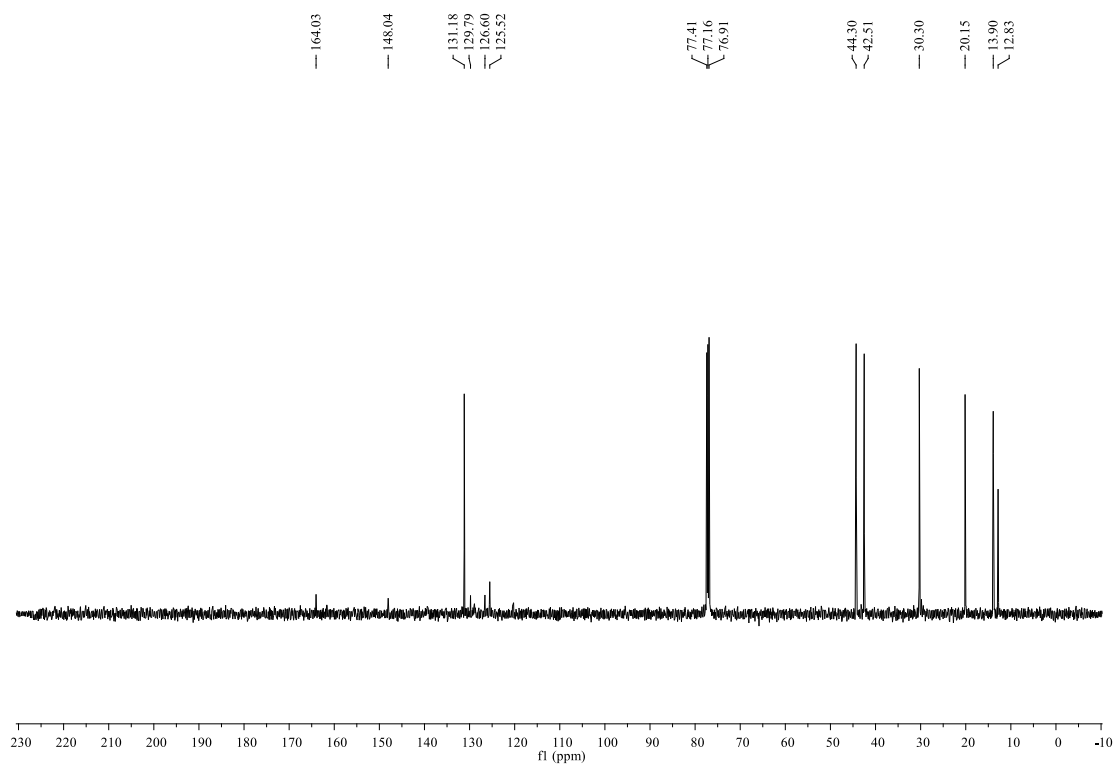

Supplement: d1qo01112j1.pdf [file d1qo01112j1.pdf]
